# Supplementary material
Source: PubMed Central journal article supplement (PMC7254969)
Supplement: NIHMS1546057-supplement-SuppInfo.pdf [file NIHMS1546057-supplement-SuppInfo.pdf]

In the format provided by the authors and unedited.

# Pro-efferocytic nanoparticles are specifically taken up by lesional macrophages and prevent atherosclerosis

Alyssa M. Flores<sup>1,9</sup>, Niloufar Hosseini-Nassab<sup>2,9</sup>, Kai-Uwe Jarr<sup>1,9</sup>, Jianqin Ye<sup>1</sup>, Xingjun Zhu<sup>2</sup>, Robert Wirka<sup>3</sup>, Ai Leen Koh<sup>4</sup>, Pavlos Tsantilas<sup>1</sup>, Ying Wang<sup>1</sup>, Vivek Nanda<sup>1</sup>, Yoko Kojima<sup>1</sup>, Yitian Zeng<sup>4</sup>, Mozhgan Lotfi<sup>1</sup>, Robert Sinclair<sup>4</sup>, Irving L. Weissman<sup>5</sup>, Erik Ingelsson<sup>3,6</sup>, Bryan Ronain Smith<sup>7,8,10\*</sup> and Nicholas J. Leeper<sup>1,3,6,10\*</sup>

---

<sup>1</sup>Department of Surgery, Division of Vascular Surgery, Stanford University School of Medicine, Stanford, CA, USA. <sup>2</sup>Department of Radiology, Stanford University School of Medicine, Stanford, CA, USA. <sup>3</sup>Department of Medicine, Division of Cardiovascular Medicine, Stanford University School of Medicine, Stanford, CA, USA. <sup>4</sup>Department of Materials Science and Engineering, Stanford University, Stanford, CA, USA. <sup>5</sup>Stanford Institute for Stem Cell Biology and Regenerative Medicine, Stanford, CA, USA. <sup>6</sup>Stanford Cardiovascular Institute, Stanford, CA, USA. <sup>7</sup>Department of Biomedical Engineering, Michigan State University, East Lansing, MI, USA. <sup>8</sup>Institute for Quantitative Health Science and Engineering, East Lansing, MI, USA. <sup>9</sup>These authors contributed equally: Alyssa M. Flores, Niloufar Hosseini-Nassab, Kai-Uwe Jarr. <sup>10</sup>These authors contributed equally: Bryan Ronain Smith, Nicholas J. Leeper.  
\*e-mail: [smit2901@msu.edu](mailto:smit2901@msu.edu); [nleeper@stanford.edu](mailto:nleeper@stanford.edu)



1 **Supplementary Table 4.** Enriched canonical pathways in SWNT-SHP1i-treated lesional macrophages  
2 from Ingenuity Pathway Analysis. Functional enrichment was assessed using two-sided Fisher's exact test  
3 (n = 4 biologically independent animals per group).

4  
5 **Supplementary Table 5.** Gene Ontology enrichment analysis of genes that were upregulated in lesional  
6 macrophages by exposure to SWNT-SHP1i. Functional enrichment was assessed using two-sided Fisher's  
7 exact test with Bonferroni correction for multiple comparisons (n = 4 biologically independent animals  
8 per group).

9  
10 **Supplementary Table 6.** Gene Ontology enrichment analysis of genes that showed reduced expression in  
11 lesional macrophages exposed to SWNT-SHP1i. Functional enrichment was assessed using two-sided  
12 Fisher's exact test with Bonferroni correction for multiple comparisons (n = 4 biologically independent  
13 animals per group).

14  
15 **Supplementary Video 1.** <sup>18</sup>F-FDG-PET/CT of SWNT-SHP1i treated and SWNT-Cy5.5 control *apoE*<sup>-/-</sup>  
16 mice.

17  
18  
19  
20  
21  
22  
23  
24  
25  
26

1 **Supplementary Methods**

2 **Endotoxin assay**

3 Formulations of SWNT-PEG, SWNT-PEG-Cy5.5 (SWNT-Cy5.5), and SWNT-PEG-Cy5.5-SHP1i  
4 (SWNT-SHP1i) were each assessed for endotoxin levels using the *Limulus* Amebocyte Lysate  
5 chromogenic endotoxin quantification kit (Thermo Scientific) according to the manufacturer's protocol.

6  
7 **Study of SHP1i release from SWNTs**

8 Solutions of SWNT- SHP1i were dialyzed at room temperature with PBS (pH=7.4). The spectroscopic  
9 absorption of the outlet buffer was measured at different timepoints to quantify the release profile of SHP1i. For  
10 study of physiologically-relevant release, solutions of SWNT-SHP1i were dialyzed at room temperature with  
11 20% serum solution in PBS. The amount of released SHP1i was measured using UV spectroscopy by sampling  
12 the serum solution at different timepoints.

13  
14 **Macrophage polarization**

15 To induce differentiation of THP-1 monocytes to M0 macrophages, cells were incubated with phorbol 12-  
16 myristate 13-acetate (PMA, 50 ngmL<sup>-1</sup>, Sigma) for 24 hrs. Once differentiated, cells were serum-starved  
17 overnight and incubated with lipopolysaccharide (LPS, 10 ngmL<sup>-1</sup>, Sigma) and human IFN- $\gamma$  (20 ngmL<sup>-1</sup>,  
18 R&D systems) to obtain classically activated M1 macrophages, or human IL-4 (20 ngmL<sup>-1</sup>) in RMPI with  
19 10% FBS for 24hr to obtain M2-polarized macrophages. RAW264.7 cells were polarized to M1  
20 macrophages by culturing cells with lipopolysaccharide (LPS, 10 ngmL<sup>-1</sup>) and mouse IFN- $\gamma$  (50 ngmL<sup>-1</sup>,  
21 Sigma), or M2 macrophages with mouse IL-4 (20 ngmL<sup>-1</sup>, BioLegend) for 24hr in DMEM supplemented  
22 with 10% FBS.

23  
24 **Apoptosis assay**

1 RAW264.7 cells were plated at 5,000 cells/well in glass bottom culture dishes (MatTek Corporation),  
2 grown overnight at 37°C, and serum-starved for the next 24hr. Apoptosis was induced with staurosporine  
3 (STS, 1 μM, Sigma-Aldrich) in the presence or absence of SWNT-Cy5.5 (4 nM), SWNT-SHP1i (4 nM),  
4 or SHP1i (300 nM) for 2 hours. Apoptosis was evaluated using the *In Situ* Cell Detection Kit, Fluorescein  
5 (Roche, 11684795910), according to the manufacturer's protocol.

6

### 7 **Proliferation assay**

8 A modified MTT (3-[4,5-dimethyl-thiazol-2-yl]-2,5-diphenyltetrazolium bromide) assays was performed  
9 to analyze macrophage proliferation and viability. RAW264.7 cells were plated at 25,000 cells/well in a  
10 96-well plate grown overnight at 37°C, and serum-starved for the next 24hr. Cells were stimulated with  
11 10% FBS for 24hr with or without SWNT-Cy5.5 (4 nM), SWNT-SHP1i (4 nM), or SHP1i (300 nM), and  
12 then incubated with 10 uL of MTT AB solution (Millipore, Billerica) for 2hr. 100 μl of acidic  
13 isopropanol (0.04N HCl) was added to each well and the absorbance was measured at 570 nm (reference  
14 wavelength 650 nm) on an ELISA plate reader using SpectraMax 190 Microplate Reader (Molecular  
15 Devices).

16

### 17 **Single-cell RNA sequencing**

18 Following aortic sample preparation, single cells were encapsulated in a gel bead that is functionalized  
19 with a 14-base pair (bp) cell-specific barcode and 10-bp unique molecular identified (UMI) that tags each  
20 mRNA molecule.<sup>7</sup> Reverse transcription occurs in each gel bead. The 10X system utilizes droplet-based  
21 microfluidics to capture the mRNA of thousands of cells in parallel. Following capture and lysis, full-  
22 length cDNA is synthesized and amplified for construction of Illumina sequencing libraries. The resulting  
23 libraries were sequenced across three lanes on an Illumina HiSeq4000 platform with a 26-bp Read 1 to  
24 sequence the cell barcode and UMI, an 8-bp i7 index read to sequence the sample index, and a 98-bp  
25 Read 2 to sequence the transcript using a paired-end configuration. Library preparation and sequencing  
26 was performed by the Stanford Functional Genomics Facility.

1 **Supplementary References**

- 2 1 Robinet, P. *et al.* Consideration of Sex Differences in Design and Reporting of Experimental  
3 Arterial Pathology Studies-Statement From ATVB Council. *Arterioscler Thromb Vasc Biol* **38**,  
4 292-303, doi:10.1161/ATVBAHA.117.309524 (2018).
- 5 2 Kojima, Y. *et al.* CD47-blocking antibodies restore phagocytosis and prevent atherosclerosis.  
6 *Nature* **536**, 86-90, doi:10.1038/nature18935 (2016).
- 7 3 Touching Base. *Nat Genet* **38** (2006).
- 8 4 Croker, B. A. *et al.* Inflammation and autoimmunity caused by a SHP1 mutation depend on IL-1,  
9 MyD88, and a microbial trigger. *Proc Natl Acad Sci U S A* **105**, 15028-15033,  
10 doi:10.1073/pnas.0806619105 (2008).
- 11 5 Su, X., Zhou, T., Yang, P., Edwards, C. K., 3rd & Mountz, J. D. Reduction of arthritis and  
12 pneumonitis in motheaten mice by soluble tumor necrosis factor receptor. *Arthritis Rheum* **41**,  
13 139-149, doi:10.1002/1529-0131(199801)41:1<139::AID-ART17>3.0.CO;2-T (1998).
- 14 6 Kaneko, T. *et al.* Dendritic cell-specific ablation of the protein tyrosine phosphatase Shp1  
15 promotes Th1 cell differentiation and induces autoimmunity. *J Immunol* **188**, 5397-5407,  
16 doi:10.4049/jimmunol.1103210 (2012).
- 17 7 Zheng, G. X. *et al.* Massively parallel digital transcriptional profiling of single cells. *Nat*  
18 *Commun* **8**, 14049, doi:10.1038/ncomms14049 (2017).
- 19

1 **Supplementary Table 4.** Enriched canonical pathways in SWNT-SHP1i-treated lesional macrophages  
2 from Ingenuity Pathway Analysis. Functional enrichment was assessed using two-sided Fisher's exact test  
3 (n = 4 biologically independent animals per group).

4  
5 **Supplementary Table 5.** Gene Ontology enrichment analysis of genes that were upregulated in lesional  
6 macrophages by exposure to SWNT-SHP1i. Functional enrichment was assessed using two-sided Fisher's  
7 exact test with Bonferroni correction for multiple comparisons (n = 4 biologically independent animals  
8 per group).

9  
10 **Supplementary Table 6.** Gene Ontology enrichment analysis of genes that showed reduced expression in  
11 lesional macrophages exposed to SWNT-SHP1i. Functional enrichment was assessed using two-sided  
12 Fisher's exact test with Bonferroni correction for multiple comparisons (n = 4 biologically independent  
13 animals per group).

14  
15 **Supplementary Video 1.** <sup>18</sup>F-FDG-PET/CT of SWNT-SHP1i treated and SWNT-Cy5.5 control *apoE*<sup>-/-</sup>  
16 mice.

17  
18  
19  
20  
21  
22  
23  
24  
25  
26

1 **Supplementary Methods**

2 **Endotoxin assay**

3 Formulations of SWNT-PEG, SWNT-PEG-Cy5.5 (SWNT-Cy5.5), and SWNT-PEG-Cy5.5-SHP1i  
4 (SWNT-SHP1i) were each assessed for endotoxin levels using the *Limulus* Amebocyte Lysate  
5 chromogenic endotoxin quantification kit (Thermo Scientific) according to the manufacturer's protocol.

6  
7 **Study of SHP1i release from SWNTs**

8 Solutions of SWNT- SHP1i were dialyzed at room temperature with PBS (pH=7.4). The spectroscopic  
9 absorption of the outlet buffer was measured at different timepoints to quantify the release profile of SHP1i. For  
10 study of physiologically-relevant release, solutions of SWNT-SHP1i were dialyzed at room temperature with  
11 20% serum solution in PBS. The amount of released SHP1i was measured using UV spectroscopy by sampling  
12 the serum solution at different timepoints.

13  
14 **Macrophage polarization**

15 To induce differentiation of THP-1 monocytes to M0 macrophages, cells were incubated with phorbol 12-  
16 myristate 13-acetate (PMA, 50 ngmL<sup>-1</sup>, Sigma) for 24 hrs. Once differentiated, cells were serum-starved  
17 overnight and incubated with lipopolysaccharide (LPS, 10 ngmL<sup>-1</sup>, Sigma) and human IFN- $\gamma$  (20 ngmL<sup>-1</sup>,  
18 R&D systems) to obtain classically activated M1 macrophages, or human IL-4 (20 ngmL<sup>-1</sup>) in RMPI with  
19 10% FBS for 24hr to obtain M2-polarized macrophages. RAW264.7 cells were polarized to M1  
20 macrophages by culturing cells with lipopolysaccharide (LPS, 10 ngmL<sup>-1</sup>) and mouse IFN- $\gamma$  (50 ngmL<sup>-1</sup>,  
21 Sigma), or M2 macrophages with mouse IL-4 (20 ngmL<sup>-1</sup>, BioLegend) for 24hr in DMEM supplemented  
22 with 10% FBS.

23  
24 **Apoptosis assay**



1 RAW264.7 cells were plated at 5,000 cells/well in glass bottom culture dishes (MatTek Corporation),  
2 grown overnight at 37°C, and serum-starved for the next 24hr. Apoptosis was induced with staurosporine  
3 (STS, 1 μM, Sigma-Aldrich) in the presence or absence of SWNT-Cy5.5 (4 nM), SWNT-SHP1i (4 nM),  
4 or SHP1i (300 nM) for 2 hours. Apoptosis was evaluated using the *In Situ* Cell Detection Kit, Fluorescein  
5 (Roche, 11684795910), according to the manufacturer's protocol.

6

### 7 **Proliferation assay**

8 A modified MTT (3-[4,5-dimethyl-thiazol-2-yl]-2,5-diphenyltetrazolium bromide) assays was performed  
9 to analyze macrophage proliferation and viability. RAW264.7 cells were plated at 25,000 cells/well in a  
10 96-well plate grown overnight at 37°C, and serum-starved for the next 24hr. Cells were stimulated with  
11 10% FBS for 24hr with or without SWNT-Cy5.5 (4 nM), SWNT-SHP1i (4 nM), or SHP1i (300 nM), and  
12 then incubated with 10 uL of MTT AB solution (Millipore, Billerica) for 2hr. 100 μl of acidic  
13 isopropanol (0.04N HCl) was added to each well and the absorbance was measured at 570 nm (reference  
14 wavelength 650 nm) on an ELISA plate reader using SpectraMax 190 Microplate Reader (Molecular  
15 Devices).

16

### 17 **Single-cell RNA sequencing**

18 Following aortic sample preparation, single cells were encapsulated in a gel bead that is functionalized  
19 with a 14-base pair (bp) cell-specific barcode and 10-bp unique molecular identified (UMI) that tags each  
20 mRNA molecule.<sup>7</sup> Reverse transcription occurs in each gel bead. The 10X system utilizes droplet-based  
21 microfluidics to capture the mRNA of thousands of cells in parallel. Following capture and lysis, full-  
22 length cDNA is synthesized and amplified for construction of Illumina sequencing libraries. The resulting  
23 libraries were sequenced across three lanes on an Illumina HiSeq4000 platform with a 26-bp Read 1 to  
24 sequence the cell barcode and UMI, an 8-bp i7 index read to sequence the sample index, and a 98-bp  
25 Read 2 to sequence the transcript using a paired-end configuration. Library preparation and sequencing  
26 was performed by the Stanford Functional Genomics Facility.

1 **Supplementary References**

- 2 1 Robinet, P. *et al.* Consideration of Sex Differences in Design and Reporting of Experimental  
3 Arterial Pathology Studies-Statement From ATVB Council. *Arterioscler Thromb Vasc Biol* **38**,  
4 292-303, doi:10.1161/ATVBAHA.117.309524 (2018).
- 5 2 Kojima, Y. *et al.* CD47-blocking antibodies restore phagocytosis and prevent atherosclerosis.  
6 *Nature* **536**, 86-90, doi:10.1038/nature18935 (2016).
- 7 3 Touching Base. *Nat Genet* **38** (2006).
- 8 4 Croker, B. A. *et al.* Inflammation and autoimmunity caused by a SHP1 mutation depend on IL-1,  
9 MyD88, and a microbial trigger. *Proc Natl Acad Sci U S A* **105**, 15028-15033,  
10 doi:10.1073/pnas.0806619105 (2008).
- 11 5 Su, X., Zhou, T., Yang, P., Edwards, C. K., 3rd & Mountz, J. D. Reduction of arthritis and  
12 pneumonitis in motheaten mice by soluble tumor necrosis factor receptor. *Arthritis Rheum* **41**,  
13 139-149, doi:10.1002/1529-0131(199801)41:1<139::AID-ART17>3.0.CO;2-T (1998).
- 14 6 Kaneko, T. *et al.* Dendritic cell-specific ablation of the protein tyrosine phosphatase Shp1  
15 promotes Th1 cell differentiation and induces autoimmunity. *J Immunol* **188**, 5397-5407,  
16 doi:10.4049/jimmunol.1103210 (2012).
- 17 7 Zheng, G. X. *et al.* Massively parallel digital transcriptional profiling of single cells. *Nat*  
18 *Commun* **8**, 14049, doi:10.1038/ncomms14049 (2017).
- 19

**Supplementary Table 1. Differentially expressed genes for each of the cell populations identified by unsupervised clustering of the scRNA-seq dataset.**

Cluster markers were identified using the non-parametric Wilcoxon rank sum test with Bonferroni correction for multiple comparisons (n = 8 biologically independent animals).

| Gene      | log2 Fold Change | pct.1 | pct.2 | P value   | Cluster |
|-----------|------------------|-------|-------|-----------|---------|
| C1qa      | 2.291464082      | 0.989 | 0.246 | 7.03E-193 | 1       |
| C1qc      | 2.079113431      | 0.995 | 0.257 | 1.97E-186 | 1       |
| C1qb      | 2.004672967      | 0.995 | 0.307 | 3.17E-184 | 1       |
| Csf1r     | 1.441349141      | 0.97  | 0.347 | 5.56E-154 | 1       |
| Pf4       | 2.623642171      | 0.829 | 0.098 | 2.20E-152 | 1       |
| Adgre1    | 1.394182768      | 0.896 | 0.177 | 3.80E-152 | 1       |
| Trf       | 1.607489033      | 0.947 | 0.269 | 9.89E-150 | 1       |
| Ms4a7     | 1.440422262      | 0.942 | 0.195 | 1.10E-143 | 1       |
| Dab2      | 1.268210835      | 0.929 | 0.243 | 7.82E-141 | 1       |
| Cd81      | 1.317932847      | 0.965 | 0.341 | 9.29E-138 | 1       |
| Selenop   | 1.862115607      | 0.989 | 0.502 | 2.23E-135 | 1       |
| Fcrls     | 1.699271456      | 0.767 | 0.091 | 7.20E-129 | 1       |
| Stab1     | 1.235877988      | 0.751 | 0.099 | 2.19E-127 | 1       |
| Fcgr3     | 1.206674515      | 0.972 | 0.444 | 3.90E-127 | 1       |
| Rnase4    | 1.176097436      | 0.783 | 0.124 | 3.83E-125 | 1       |
| Iitm2b    | 1.023261983      | 0.998 | 0.925 | 8.76E-125 | 1       |
| C3ar1     | 1.074230931      | 0.834 | 0.154 | 3.97E-124 | 1       |
| Fcgrt     | 1.687996112      | 0.815 | 0.182 | 4.55E-123 | 1       |
| Trem2     | 1.122079957      | 0.862 | 0.18  | 2.39E-120 | 1       |
| Ctsc      | 1.203979074      | 0.97  | 0.537 | 4.61E-119 | 1       |
| P2ry6     | 0.981993926      | 0.838 | 0.235 | 9.71E-114 | 1       |
| Ehd4      | 1.007086907      | 0.857 | 0.301 | 1.40E-113 | 1       |
| Rgs10     | 0.951730998      | 0.94  | 0.465 | 1.41E-113 | 1       |
| Mrc1      | 1.468775424      | 0.691 | 0.096 | 2.27E-112 | 1       |
| Pmp22     | 1.089663602      | 0.672 | 0.075 | 1.12E-108 | 1       |
| Timp2     | 1.153247531      | 0.928 | 0.372 | 5.52E-107 | 1       |
| Camk1     | 0.93299381       | 0.797 | 0.207 | 1.80E-105 | 1       |
| Grn       | 1.00663332       | 0.977 | 0.474 | 2.90E-102 | 1       |
| CSar1     | 0.923635831      | 0.877 | 0.228 | 1.20E-101 | 1       |
| Glul      | 1.058202849      | 0.829 | 0.274 | 1.07E-99  | 1       |
| Rab3il1   | 0.842642422      | 0.697 | 0.133 | 1.10E-99  | 1       |
| Smagp     | 0.928972799      | 0.638 | 0.091 | 4.87E-97  | 1       |
| Igfbp4    | 0.858830542      | 0.765 | 0.167 | 6.60E-95  | 1       |
| Blvrb     | 0.987672148      | 0.79  | 0.249 | 1.64E-92  | 1       |
| Igf1      | 0.847226785      | 0.7   | 0.116 | 4.24E-91  | 1       |
| Pid1      | 0.90576315       | 0.824 | 0.263 | 5.47E-91  | 1       |
| Unc93b1   | 0.878982776      | 0.965 | 0.509 | 2.31E-90  | 1       |
| Ccl12     | 1.743520454      | 0.591 | 0.068 | 2.50E-90  | 1       |
| Pltp      | 1.03794599       | 0.834 | 0.272 | 1.46E-87  | 1       |
| Tmem37    | 0.819952086      | 0.658 | 0.127 | 8.46E-86  | 1       |
| Cd14      | 0.700171689      | 0.942 | 0.392 | 7.82E-85  | 1       |
| Ntpr      | 0.839598284      | 0.637 | 0.132 | 1.23E-84  | 1       |
| Cbr2      | 1.611514895      | 0.541 | 0.059 | 1.36E-84  | 1       |
| Gas6      | 1.219436472      | 0.674 | 0.153 | 1.56E-84  | 1       |
| Fcgr2b    | 0.892566942      | 0.907 | 0.385 | 9.02E-83  | 1       |
| Folr2     | 2.058610302      | 0.476 | 0.027 | 1.36E-81  | 1       |
| Lifr      | 0.72010119       | 0.559 | 0.071 | 4.68E-81  | 1       |
| Dhrs3     | 0.748421365      | 0.783 | 0.259 | 4.87E-81  | 1       |
| Lgmn      | 0.776318807      | 0.981 | 0.45  | 1.70E-80  | 1       |
| Cd63      | 0.566130176      | 0.965 | 0.43  | 3.48E-80  | 1       |
| Mafb      | 0.842135805      | 0.78  | 0.209 | 1.74E-79  | 1       |
| Ccl2      | 1.103548038      | 0.739 | 0.208 | 7.36E-79  | 1       |
| Pld4      | 0.854267168      | 0.887 | 0.397 | 1.43E-78  | 1       |
| Cst3      | 0.576731191      | 1     | 0.902 | 8.03E-78  | 1       |
| Lmo2      | 0.658246224      | 0.737 | 0.242 | 1.27E-77  | 1       |
| Ltc4s     | 1.357925285      | 0.476 | 0.037 | 1.53E-77  | 1       |
| Cxcl16    | 0.826198493      | 0.841 | 0.294 | 1.38E-75  | 1       |
| Serinc3   | 0.770346783      | 0.947 | 0.628 | 2.70E-75  | 1       |
| Ms4a6d    | 0.72886947       | 0.866 | 0.331 | 9.73E-75  | 1       |
| Cd302     | 0.671137175      | 0.762 | 0.259 | 2.07E-74  | 1       |
| Slco2b1   | 0.625958177      | 0.418 | 0.008 | 2.15E-74  | 1       |
| Mgl2      | 0.986397279      | 0.637 | 0.126 | 4.55E-74  | 1       |
| Mef2c     | 0.630429274      | 0.64  | 0.147 | 6.12E-74  | 1       |
| Fos       | 1.049492272      | 0.94  | 0.659 | 9.75E-74  | 1       |
| Hexa      | 0.713352465      | 0.968 | 0.525 | 1.06E-73  | 1       |
| Ly86      | 0.791001282      | 0.912 | 0.409 | 1.71E-72  | 1       |
| Serpinb6a | 0.719080135      | 0.718 | 0.205 | 2.46E-72  | 1       |
| Lyz2      | 0.791613081      | 0.996 | 0.594 | 2.74E-71  | 1       |
| Itgfb5    | 0.693235452      | 0.73  | 0.222 | 5.75E-69  | 1       |
| Adam15    | 0.65788784       | 0.658 | 0.185 | 1.11E-68  | 1       |
| Ccl7      | 1.655833277      | 0.57  | 0.115 | 3.31E-68  | 1       |

|           |             |       |       |          |   |
|-----------|-------------|-------|-------|----------|---|
| Mt1       | 0.770165077 | 0.986 | 0.703 | 3.41E-68 | 1 |
| Trim47    | 0.622740284 | 0.506 | 0.075 | 4.84E-68 | 1 |
| Jun       | 1.018673945 | 0.84  | 0.38  | 2.00E-67 | 1 |
| Tmem176b  | 0.724757692 | 0.899 | 0.373 | 1.07E-66 | 1 |
| Lamp2     | 0.637264554 | 0.894 | 0.437 | 1.43E-66 | 1 |
| Laptn4a   | 0.603290259 | 0.905 | 0.516 | 1.80E-65 | 1 |
| Gas7      | 0.714233434 | 0.545 | 0.107 | 3.08E-65 | 1 |
| Nfkbiz    | 0.803665804 | 0.765 | 0.29  | 4.56E-65 | 1 |
| Cfh       | 0.806869774 | 0.617 | 0.167 | 6.29E-65 | 1 |
| Tcf4      | 0.605560616 | 0.605 | 0.164 | 2.81E-64 | 1 |
| Hpgd      | 0.737398413 | 0.441 | 0.047 | 3.82E-63 | 1 |
| Snx5      | 0.608668092 | 0.91  | 0.508 | 3.99E-63 | 1 |
| Ctsb      | 0.297503257 | 1     | 0.724 | 6.68E-63 | 1 |
| Ninj1     | 1.100087355 | 0.824 | 0.396 | 7.54E-63 | 1 |
| Fcgr1     | 0.691734831 | 0.679 | 0.216 | 9.39E-63 | 1 |
| App       | 0.570297934 | 0.847 | 0.399 | 4.46E-62 | 1 |
| Tnfaiip82 | 0.68000022  | 0.723 | 0.291 | 3.89E-61 | 1 |
| Slamf9    | 0.836145622 | 0.593 | 0.161 | 5.02E-61 | 1 |
| Maf       | 0.843585349 | 0.557 | 0.14  | 1.97E-60 | 1 |
| Gpr34     | 0.659684601 | 0.397 | 0.033 | 2.65E-60 | 1 |
| Aif1      | 0.571521894 | 0.81  | 0.294 | 5.28E-60 | 1 |
| Ang       | 0.619539628 | 0.432 | 0.051 | 1.24E-59 | 1 |
| F13a1     | 1.460956371 | 0.515 | 0.123 | 1.13E-58 | 1 |
| C4b       | 1.040490097 | 0.379 | 0.028 | 2.36E-58 | 1 |
| Metrl     | 0.794681186 | 0.841 | 0.42  | 8.14E-58 | 1 |
| Cd86      | 0.636301016 | 0.684 | 0.257 | 2.32E-57 | 1 |
| Fxyd2     | 0.912824801 | 0.342 | 0.013 | 2.62E-57 | 1 |
| Abhd12    | 0.558023821 | 0.748 | 0.318 | 4.15E-57 | 1 |
| Ifi207    | 0.747908507 | 0.619 | 0.215 | 1.00E-56 | 1 |
| Ctsh      | 0.62704447  | 0.972 | 0.492 | 1.15E-56 | 1 |
| Ccl9      | 0.855618221 | 0.817 | 0.375 | 1.73E-56 | 1 |
| Ctsl      | 0.279744938 | 0.845 | 0.358 | 1.92E-56 | 1 |
| Pea15a    | 0.642538879 | 0.683 | 0.26  | 1.98E-56 | 1 |
| Rtn4      | 0.57406878  | 0.884 | 0.506 | 2.22E-56 | 1 |
| Sult1a1   | 0.669966311 | 0.381 | 0.033 | 3.76E-56 | 1 |
| Zfx3      | 0.551436645 | 0.439 | 0.064 | 5.19E-56 | 1 |
| Rab7b     | 0.626133459 | 0.608 | 0.178 | 7.00E-56 | 1 |
| Hexb      | 0.982990034 | 0.815 | 0.44  | 1.59E-55 | 1 |
| Comt      | 0.536736207 | 0.735 | 0.307 | 1.75E-55 | 1 |
| Lyve1     | 1.281046643 | 0.307 | 0.001 | 2.73E-55 | 1 |
| Blnk      | 0.533275576 | 0.531 | 0.123 | 3.83E-55 | 1 |
| Man2b1    | 0.572591511 | 0.848 | 0.467 | 4.90E-55 | 1 |
| Cxcl2     | 0.566907924 | 0.838 | 0.393 | 6.85E-55 | 1 |
| Gatm      | 0.590165568 | 0.506 | 0.113 | 1.38E-54 | 1 |
| Rhob      | 0.687694174 | 0.626 | 0.202 | 2.26E-54 | 1 |
| Tgfb1     | 0.497341368 | 0.935 | 0.43  | 1.05E-53 | 1 |
| Asah1     | 0.560747971 | 0.847 | 0.409 | 1.60E-53 | 1 |
| Hfe       | 0.560940037 | 0.617 | 0.201 | 2.49E-53 | 1 |
| Cltc      | 0.556274534 | 0.743 | 0.334 | 3.72E-53 | 1 |
| Ms4a6c    | 0.66987308  | 0.832 | 0.371 | 3.85E-53 | 1 |
| Klf6      | 0.874696787 | 0.878 | 0.54  | 7.87E-53 | 1 |
| Socs3     | 0.921150155 | 0.755 | 0.364 | 4.12E-52 | 1 |
| Cybb      | 0.540234568 | 0.815 | 0.349 | 5.59E-52 | 1 |
| Ccl8      | 2.25538722  | 0.342 | 0.025 | 3.99E-51 | 1 |
| Dok3      | 0.431176226 | 0.582 | 0.164 | 6.49E-51 | 1 |
| Anxa3     | 0.460352237 | 0.644 | 0.221 | 5.62E-50 | 1 |
| Tm6sf1    | 0.545078854 | 0.829 | 0.429 | 8.24E-49 | 1 |
| Cd83      | 0.778492068 | 0.716 | 0.315 | 1.21E-48 | 1 |
| Hacd4     | 0.50411549  | 0.527 | 0.149 | 1.55E-48 | 1 |
| Rab11fip5 | 0.445953133 | 0.414 | 0.075 | 5.94E-48 | 1 |
| Tmem106a  | 0.566280866 | 0.656 | 0.262 | 7.18E-48 | 1 |
| Ctsa      | 0.523656209 | 0.917 | 0.532 | 8.66E-48 | 1 |
| Prune2    | 0.397471763 | 0.305 | 0.017 | 1.51E-47 | 1 |
| Tspan4    | 0.542860213 | 0.45  | 0.102 | 1.81E-47 | 1 |
| Vsir      | 0.5486193   | 0.82  | 0.431 | 3.13E-47 | 1 |
| Zfp36     | 0.694209869 | 0.878 | 0.525 | 3.82E-47 | 1 |
| Lamp1     | 0.465268662 | 0.981 | 0.661 | 8.94E-47 | 1 |
| Tnfsf12   | 0.437040709 | 0.563 | 0.174 | 9.67E-47 | 1 |
| Sdc4      | 0.682307567 | 0.589 | 0.194 | 1.58E-46 | 1 |
| Fuca1     | 0.469104718 | 0.787 | 0.388 | 6.40E-46 | 1 |
| Ap2a2     | 0.621020067 | 0.593 | 0.24  | 1.20E-45 | 1 |
| Tmem176a  | 0.480270596 | 0.783 | 0.315 | 1.32E-45 | 1 |
| Tcn2      | 0.5304257   | 0.637 | 0.256 | 1.51E-45 | 1 |
| Cndp2     | 0.496348093 | 0.721 | 0.308 | 1.58E-45 | 1 |
| Cx3cr1    | 0.646054921 | 0.45  | 0.109 | 2.49E-45 | 1 |
| Egr1      | 0.727092242 | 0.66  | 0.267 | 3.07E-45 | 1 |
| Clec12a   | 0.591003903 | 0.594 | 0.218 | 3.38E-45 | 1 |

|          |             |       |       |          |   |
|----------|-------------|-------|-------|----------|---|
| Arrb2    | 0.446402721 | 0.743 | 0.371 | 4.91E-45 | 1 |
| Ighm     | 0.31609416  | 0.697 | 0.297 | 5.98E-45 | 1 |
| Clec4a1  | 0.582410601 | 0.621 | 0.232 | 6.40E-45 | 1 |
| Rac3     | 0.414123945 | 0.305 | 0.023 | 7.75E-45 | 1 |
| Rnf130   | 0.52760588  | 0.774 | 0.405 | 9.14E-45 | 1 |
| Sash1    | 0.486888918 | 0.349 | 0.054 | 6.34E-44 | 1 |
| S100a1   | 0.287426773 | 0.614 | 0.221 | 1.10E-43 | 1 |
| Cd72     | 0.939173729 | 0.563 | 0.198 | 1.18E-43 | 1 |
| Il10rb   | 0.455156937 | 0.82  | 0.447 | 1.28E-43 | 1 |
| Plod1    | 0.438372794 | 0.422 | 0.1   | 1.95E-43 | 1 |
| Tbxas1   | 0.503011308 | 0.485 | 0.139 | 2.26E-43 | 1 |
| Fez2     | 0.4456249   | 0.436 | 0.106 | 6.16E-43 | 1 |
| Vkorc1   | 0.378183544 | 0.522 | 0.167 | 6.98E-43 | 1 |
| Frmf4b   | 0.557605414 | 0.481 | 0.136 | 7.37E-43 | 1 |
| Pdlim4   | 0.328734372 | 0.411 | 0.085 | 8.32E-43 | 1 |
| Pkig     | 0.440993245 | 0.612 | 0.25  | 1.31E-42 | 1 |
| Lrrc25   | 0.438681397 | 0.787 | 0.372 | 1.37E-42 | 1 |
| Marcks1  | 0.354521342 | 0.732 | 0.311 | 1.80E-42 | 1 |
| Atpf1    | 0.464355863 | 0.892 | 0.536 | 2.59E-42 | 1 |
| Lacc1    | 0.484114581 | 0.418 | 0.099 | 2.87E-42 | 1 |
| Selenbp1 | 0.552044638 | 0.328 | 0.042 | 3.75E-42 | 1 |
| Clec4a2  | 0.514593437 | 0.647 | 0.26  | 6.80E-42 | 1 |
| Cebpd    | 0.347733774 | 0.573 | 0.192 | 1.37E-41 | 1 |
| Lair1    | 0.476189366 | 0.547 | 0.188 | 1.39E-41 | 1 |
| Gusb     | 0.515436283 | 0.751 | 0.38  | 1.98E-41 | 1 |
| Marcks   | 0.502463236 | 0.743 | 0.375 | 2.61E-41 | 1 |
| Aldh2    | 0.501402591 | 0.739 | 0.361 | 4.78E-41 | 1 |
| Stard8   | 0.468134969 | 0.257 | 0.011 | 4.80E-41 | 1 |
| Itm2c    | 0.476193011 | 0.82  | 0.477 | 7.03E-41 | 1 |
| Cited2   | 0.794680815 | 0.607 | 0.248 | 7.97E-41 | 1 |
| Cmtm3    | 0.511754421 | 0.591 | 0.24  | 1.17E-40 | 1 |
| Tsen34   | 0.415352524 | 0.487 | 0.156 | 1.33E-40 | 1 |
| Alox5ap  | 0.395078199 | 0.963 | 0.516 | 1.45E-40 | 1 |
| Nenf     | 0.391040062 | 0.638 | 0.273 | 3.42E-40 | 1 |
| Cfp      | 0.632466954 | 0.757 | 0.362 | 3.70E-40 | 1 |
| Nrp1     | 0.501905266 | 0.478 | 0.151 | 4.36E-40 | 1 |
| Lmna     | 0.546933284 | 0.628 | 0.239 | 1.16E-39 | 1 |
| Ccl24    | 0.909083688 | 0.266 | 0.018 | 1.44E-39 | 1 |
| Zeb2     | 0.511394693 | 0.728 | 0.335 | 1.69E-39 | 1 |
| Prdx4    | 0.415930913 | 0.559 | 0.208 | 2.74E-39 | 1 |
| Picalm   | 0.376396204 | 0.711 | 0.351 | 3.39E-39 | 1 |
| Pla2g15  | 0.39023854  | 0.462 | 0.134 | 3.40E-39 | 1 |
| Bin1     | 0.550996697 | 0.649 | 0.297 | 3.88E-39 | 1 |
| Selenom  | 0.28867547  | 0.489 | 0.141 | 4.46E-39 | 1 |
| Mt2      | 0.35454077  | 0.787 | 0.399 | 4.60E-39 | 1 |
| Wnk1     | 0.42398469  | 0.762 | 0.393 | 5.09E-39 | 1 |
| Ccl3     | 0.593424148 | 0.635 | 0.266 | 6.18E-39 | 1 |
| Ier3     | 0.471864519 | 0.69  | 0.284 | 6.74E-39 | 1 |
| Kcnk13   | 0.404646668 | 0.316 | 0.048 | 1.20E-38 | 1 |
| Snx8     | 0.450142036 | 0.432 | 0.127 | 1.55E-38 | 1 |
| Itsn1    | 0.411062609 | 0.273 | 0.025 | 1.70E-38 | 1 |
| Man1c1   | 0.446549825 | 0.346 | 0.066 | 2.68E-38 | 1 |
| Rhoc     | 0.426293647 | 0.566 | 0.195 | 2.95E-38 | 1 |
| Lyl1     | 0.414542975 | 0.467 | 0.146 | 4.00E-38 | 1 |
| Hmox1    | 0.502548343 | 0.578 | 0.211 | 4.09E-38 | 1 |
| Cd68     | 0.355469939 | 0.931 | 0.471 | 5.42E-38 | 1 |
| Atf3     | 0.640154986 | 0.744 | 0.379 | 5.74E-38 | 1 |
| Ap1b1    | 0.437215521 | 0.437 | 0.124 | 8.81E-38 | 1 |
| Rin2     | 0.417952301 | 0.381 | 0.091 | 2.10E-37 | 1 |
| Rrbp1    | 0.41504682  | 0.788 | 0.423 | 2.95E-37 | 1 |
| Ifi2712a | 0.97704624  | 0.924 | 0.631 | 1.36E-36 | 1 |
| Ckb      | 0.503344451 | 0.728 | 0.359 | 1.51E-36 | 1 |
| Pon2     | 0.44376715  | 0.635 | 0.311 | 3.69E-36 | 1 |
| Anxa5    | 0.38707863  | 0.951 | 0.627 | 4.79E-36 | 1 |
| Atp13a2  | 0.398441076 | 0.481 | 0.161 | 8.50E-36 | 1 |
| Olfml3   | 0.504876011 | 0.272 | 0.031 | 9.04E-36 | 1 |
| Dusp1    | 0.66167929  | 0.924 | 0.73  | 1.35E-35 | 1 |
| Ifitm2   | 0.377212445 | 0.979 | 0.601 | 2.87E-35 | 1 |
| Atraid   | 0.377530409 | 0.649 | 0.314 | 3.18E-35 | 1 |
| Zfp361   | 0.471467191 | 0.746 | 0.379 | 3.95E-35 | 1 |
| Abca1    | 0.437565001 | 0.485 | 0.17  | 4.86E-35 | 1 |
| Tmem59   | 0.365324421 | 0.908 | 0.603 | 5.73E-35 | 1 |
| Pepd     | 0.588266498 | 0.573 | 0.267 | 6.57E-35 | 1 |
| Erp29    | 0.417460413 | 0.875 | 0.516 | 6.83E-35 | 1 |
| Rnf13    | 0.365039775 | 0.6   | 0.267 | 8.53E-35 | 1 |
| Slc29a1  | 0.451109148 | 0.49  | 0.174 | 8.99E-35 | 1 |
| Wwp1     | 0.424441427 | 0.337 | 0.071 | 1.05E-34 | 1 |

|           |             |       |       |          |   |
|-----------|-------------|-------|-------|----------|---|
| Plekho1   | 0.40815745  | 0.646 | 0.297 | 1.32E-34 | 1 |
| Tmbim1    | 0.461625915 | 0.471 | 0.17  | 1.41E-34 | 1 |
| Ms4a6b    | 0.51378731  | 0.787 | 0.443 | 1.79E-34 | 1 |
| Serpinf1  | 0.368108558 | 0.411 | 0.113 | 2.10E-34 | 1 |
| Tubb6     | 0.513809737 | 0.624 | 0.286 | 2.37E-34 | 1 |
| Man1a     | 0.424226161 | 0.466 | 0.16  | 2.84E-34 | 1 |
| Tmed10    | 0.409413044 | 0.891 | 0.557 | 3.65E-34 | 1 |
| Nrros     | 0.439025496 | 0.743 | 0.373 | 5.58E-34 | 1 |
| Hpgds     | 0.405338648 | 0.443 | 0.136 | 7.62E-34 | 1 |
| Adap2     | 0.382840536 | 0.325 | 0.068 | 7.72E-34 | 1 |
| Cttnbp2nl | 0.392475958 | 0.37  | 0.099 | 8.58E-34 | 1 |
| Npl       | 0.549285898 | 0.265 | 0.033 | 8.63E-34 | 1 |
| Mtss1     | 0.439220714 | 0.45  | 0.15  | 1.32E-33 | 1 |
| Alox5     | 0.355286492 | 0.291 | 0.042 | 1.44E-33 | 1 |
| Hsbp1     | 0.355076088 | 0.806 | 0.495 | 2.04E-33 | 1 |
| Rab14     | 0.378787014 | 0.776 | 0.468 | 3.08E-33 | 1 |
| Ctss      | 0.300663127 | 0.989 | 0.656 | 4.10E-33 | 1 |
| Tmem141   | 0.384823292 | 0.356 | 0.091 | 4.49E-33 | 1 |
| Ecm1      | 0.488198839 | 0.559 | 0.229 | 4.82E-33 | 1 |
| Lilra5    | 0.36748438  | 0.284 | 0.044 | 7.87E-33 | 1 |
| Cd151     | 0.361566832 | 0.37  | 0.098 | 9.48E-33 | 1 |
| Dram2     | 0.352209854 | 0.58  | 0.262 | 1.15E-32 | 1 |
| B4gal1t6  | 0.405199441 | 0.374 | 0.103 | 1.51E-32 | 1 |
| Tgfbr2    | 0.325435736 | 0.503 | 0.181 | 1.53E-32 | 1 |
| Ergic3    | 0.372882059 | 0.681 | 0.361 | 1.59E-32 | 1 |
| Gna12     | 0.308765092 | 0.362 | 0.095 | 2.01E-32 | 1 |
| Ncf1      | 0.388377573 | 0.533 | 0.221 | 2.15E-32 | 1 |
| Pros1     | 0.365478231 | 0.333 | 0.078 | 2.41E-32 | 1 |
| Eif4ebp1  | 0.357838997 | 0.684 | 0.345 | 3.61E-32 | 1 |
| Cebpa     | 0.490691677 | 0.504 | 0.199 | 4.64E-32 | 1 |
| Bst2      | 0.464441662 | 0.817 | 0.502 | 6.77E-32 | 1 |
| Fcer1g    | 0.374806437 | 0.998 | 0.696 | 7.96E-32 | 1 |
| Ctsf      | 0.305277508 | 0.273 | 0.041 | 8.23E-32 | 1 |
| Mcub      | 0.302830652 | 0.658 | 0.298 | 9.25E-32 | 1 |
| Ucp2      | 0.43793194  | 0.931 | 0.704 | 9.43E-32 | 1 |
| Mapk3     | 0.361413921 | 0.582 | 0.281 | 1.07E-31 | 1 |
| Rassf4    | 0.385279044 | 0.554 | 0.239 | 1.23E-31 | 1 |
| Clec4a3   | 0.366017709 | 0.661 | 0.29  | 1.34E-31 | 1 |
| Cyflp1    | 0.374123593 | 0.568 | 0.266 | 1.35E-31 | 1 |
| Rab5c     | 0.393924695 | 0.795 | 0.487 | 1.38E-31 | 1 |
| Col14a1   | 0.283064054 | 0.27  | 0.038 | 1.39E-31 | 1 |
| P2rx4     | 0.419090418 | 0.637 | 0.303 | 1.63E-31 | 1 |
| Daglb     | 0.364135838 | 0.467 | 0.17  | 2.08E-31 | 1 |
| Ctla      | 0.412171831 | 0.965 | 0.752 | 2.86E-31 | 1 |
| Bmyc      | 0.333954131 | 0.51  | 0.198 | 3.02E-31 | 1 |
| Arhgap22  | 0.349642829 | 0.302 | 0.064 | 3.89E-31 | 1 |
| Atp6v0b   | 0.358717961 | 0.928 | 0.632 | 6.32E-31 | 1 |
| Milr1     | 0.367715412 | 0.434 | 0.154 | 1.17E-30 | 1 |
| Fam234a   | 0.356267993 | 0.399 | 0.124 | 2.25E-30 | 1 |
| Tmem109   | 0.355009299 | 0.522 | 0.221 | 2.92E-30 | 1 |
| Ptgs1     | 0.344710529 | 0.272 | 0.044 | 3.73E-30 | 1 |
| Atp2b1    | 0.369140567 | 0.783 | 0.444 | 4.81E-30 | 1 |
| Snx2      | 0.500152426 | 0.684 | 0.397 | 5.78E-30 | 1 |
| Hmox2     | 0.345462862 | 0.658 | 0.347 | 8.33E-30 | 1 |
| Txndc17   | 0.274127581 | 0.802 | 0.485 | 9.03E-30 | 1 |
| Gnai2     | 0.361369452 | 0.966 | 0.785 | 1.03E-29 | 1 |
| Plxnb2    | 0.344235002 | 0.354 | 0.098 | 1.13E-29 | 1 |
| Snx3      | 0.408223948 | 0.882 | 0.577 | 1.70E-29 | 1 |
| Gns       | 0.324442175 | 0.624 | 0.294 | 1.82E-29 | 1 |
| Nfic      | 0.349072155 | 0.367 | 0.11  | 2.83E-29 | 1 |
| Phlda1    | 0.619913966 | 0.499 | 0.209 | 4.97E-29 | 1 |
| Pla2g7    | 0.308817672 | 0.698 | 0.307 | 6.50E-29 | 1 |
| Tlr7      | 0.324561035 | 0.321 | 0.078 | 6.99E-29 | 1 |
| Mpp1      | 0.370912973 | 0.54  | 0.223 | 8.15E-29 | 1 |
| Cyth4     | 0.36629215  | 0.765 | 0.453 | 9.97E-29 | 1 |
| Tlr2      | 0.461639427 | 0.593 | 0.283 | 1.18E-28 | 1 |
| Tifa      | 0.362914638 | 0.478 | 0.191 | 1.28E-28 | 1 |
| Sqor      | 0.317368769 | 0.363 | 0.109 | 2.09E-28 | 1 |
| Fgd2      | 0.381768749 | 0.406 | 0.146 | 2.20E-28 | 1 |
| Stard3nl  | 0.353013434 | 0.543 | 0.263 | 2.48E-28 | 1 |
| Ptov1     | 0.280984951 | 0.455 | 0.181 | 3.06E-28 | 1 |
| Creb5     | 0.314066727 | 0.302 | 0.069 | 3.41E-28 | 1 |
| Lpcat2    | 0.330451976 | 0.503 | 0.204 | 5.08E-28 | 1 |
| Nisch     | 0.375453582 | 0.646 | 0.347 | 5.71E-28 | 1 |
| Ilk       | 0.298714254 | 0.631 | 0.328 | 5.84E-28 | 1 |
| Emp1      | 0.424438361 | 0.457 | 0.175 | 7.36E-28 | 1 |
| Sdc3      | 0.366593813 | 0.462 | 0.182 | 1.64E-27 | 1 |

|               |             |       |       |          |   |
|---------------|-------------|-------|-------|----------|---|
| Ly96          | 0.30594687  | 0.451 | 0.18  | 7.28E-27 | 1 |
| Atp6ap1       | 0.315619387 | 0.78  | 0.453 | 9.02E-27 | 1 |
| Sirpa         | 0.295219225 | 0.702 | 0.342 | 9.61E-27 | 1 |
| Snx6          | 0.373060587 | 0.593 | 0.321 | 2.76E-26 | 1 |
| Bsg           | 0.281838876 | 0.887 | 0.611 | 3.09E-26 | 1 |
| Tmcc3         | 0.360281953 | 0.307 | 0.081 | 3.45E-26 | 1 |
| Tm2d2         | 0.327793409 | 0.651 | 0.375 | 3.83E-26 | 1 |
| Dse           | 0.366840353 | 0.34  | 0.109 | 4.70E-26 | 1 |
| Ap2m1         | 0.378915931 | 0.806 | 0.564 | 5.59E-26 | 1 |
| Eid1          | 0.352345971 | 0.481 | 0.214 | 6.60E-26 | 1 |
| Ggh           | 0.299475507 | 0.594 | 0.296 | 6.86E-26 | 1 |
| Rcn3          | 0.502072264 | 0.395 | 0.144 | 7.16E-26 | 1 |
| ldh2          | 0.341326449 | 0.439 | 0.177 | 7.33E-26 | 1 |
| Ptpro         | 0.341878126 | 0.351 | 0.116 | 1.19E-25 | 1 |
| Susd3         | 0.355336021 | 0.485 | 0.209 | 1.31E-25 | 1 |
| Fkbp5         | 0.360673582 | 0.39  | 0.139 | 1.35E-25 | 1 |
| Il6ra         | 0.327079043 | 0.425 | 0.168 | 1.67E-25 | 1 |
| Adap2os       | 0.322850365 | 0.291 | 0.076 | 1.76E-25 | 1 |
| Luzp1         | 0.282951103 | 0.303 | 0.083 | 3.48E-25 | 1 |
| Evi2a         | 0.325585714 | 0.764 | 0.429 | 3.52E-25 | 1 |
| Cxcl1         | 0.633596008 | 0.275 | 0.062 | 4.76E-25 | 1 |
| Ccl4          | 0.396100529 | 0.614 | 0.315 | 5.92E-25 | 1 |
| Ccr5          | 0.42313909  | 0.489 | 0.231 | 6.59E-25 | 1 |
| Card19        | 0.266958668 | 0.765 | 0.461 | 7.98E-25 | 1 |
| Sczep1        | 0.372919094 | 0.492 | 0.235 | 8.80E-25 | 1 |
| Cd36          | 0.428168388 | 0.296 | 0.079 | 1.62E-24 | 1 |
| Lrpap1        | 0.261641552 | 0.552 | 0.28  | 1.94E-24 | 1 |
| Ppp1r21       | 0.301042678 | 0.339 | 0.113 | 2.12E-24 | 1 |
| Dnase1l1      | 0.338315197 | 0.39  | 0.154 | 3.72E-24 | 1 |
| Cnpy3         | 0.318067482 | 0.52  | 0.256 | 3.73E-24 | 1 |
| Irf5          | 0.252416536 | 0.739 | 0.388 | 4.42E-24 | 1 |
| Dpysl2        | 0.335949725 | 0.48  | 0.211 | 4.51E-24 | 1 |
| Tmcc1         | 0.322285894 | 0.379 | 0.133 | 5.25E-24 | 1 |
| Cdkn1a        | 0.656986817 | 0.677 | 0.413 | 5.75E-24 | 1 |
| Ccl6          | 0.282851216 | 0.799 | 0.471 | 6.10E-24 | 1 |
| Dusp6         | 0.349774132 | 0.392 | 0.139 | 6.22E-24 | 1 |
| Myo5a         | 0.337028158 | 0.347 | 0.119 | 6.27E-24 | 1 |
| Ilgam         | 0.251544578 | 0.547 | 0.253 | 6.38E-24 | 1 |
| Hsd17b11      | 0.293112191 | 0.305 | 0.089 | 6.91E-24 | 1 |
| Rabac1        | 0.253362    | 0.884 | 0.648 | 9.65E-24 | 1 |
| Tmem55b       | 0.281607487 | 0.536 | 0.262 | 1.09E-23 | 1 |
| Ptpn18        | 0.297731559 | 0.91  | 0.625 | 1.22E-23 | 1 |
| Ifi204        | 0.406444019 | 0.483 | 0.208 | 1.26E-23 | 1 |
| Slc6a6        | 0.289573149 | 0.561 | 0.294 | 1.27E-23 | 1 |
| Fam46a        | 0.439812243 | 0.446 | 0.195 | 1.47E-23 | 1 |
| mt-Atp6       | 0.251324733 | 0.998 | 0.96  | 1.52E-23 | 1 |
| Crif2         | 0.30921461  | 0.723 | 0.431 | 1.57E-23 | 1 |
| Ptpra         | 0.259776297 | 0.497 | 0.231 | 1.74E-23 | 1 |
| Fam174a       | 0.277153891 | 0.637 | 0.349 | 1.87E-23 | 1 |
| Aoah          | 0.305762867 | 0.282 | 0.075 | 2.21E-23 | 1 |
| Axl           | 0.354932928 | 0.441 | 0.184 | 2.59E-23 | 1 |
| Tnf           | 0.355277315 | 0.386 | 0.143 | 3.40E-23 | 1 |
| Nfkbia        | 0.294112098 | 0.889 | 0.692 | 4.38E-23 | 1 |
| Ap2s1         | 0.302335087 | 0.81  | 0.569 | 5.17E-23 | 1 |
| Rnpep         | 0.276251142 | 0.596 | 0.31  | 6.10E-23 | 1 |
| Spred1        | 0.251962189 | 0.317 | 0.103 | 8.51E-23 | 1 |
| Klf9          | 0.30067253  | 0.432 | 0.18  | 8.54E-23 | 1 |
| Slc35b2       | 0.263495183 | 0.404 | 0.167 | 8.74E-23 | 1 |
| Pou2f2        | 0.357279737 | 0.42  | 0.168 | 1.05E-22 | 1 |
| mt-Cytb       | 0.290437441 | 0.998 | 0.911 | 1.32E-22 | 1 |
| Fkbp2         | 0.260274715 | 0.723 | 0.414 | 1.33E-22 | 1 |
| Prcp          | 0.270315939 | 0.64  | 0.341 | 1.38E-22 | 1 |
| Necap2        | 0.299358441 | 0.651 | 0.368 | 1.44E-22 | 1 |
| Tspan17       | 0.274839338 | 0.303 | 0.098 | 1.52E-22 | 1 |
| Epn1          | 0.31581531  | 0.633 | 0.352 | 1.67E-22 | 1 |
| Il4ra         | 0.297431893 | 0.503 | 0.236 | 1.69E-22 | 1 |
| Plbd2         | 0.28455389  | 0.429 | 0.201 | 1.76E-22 | 1 |
| 2610001J05Rik | 0.277874095 | 0.649 | 0.378 | 1.81E-22 | 1 |
| Rtcb          | 0.334993424 | 0.571 | 0.317 | 1.95E-22 | 1 |
| Gdi2          | 0.295238939 | 0.944 | 0.713 | 2.15E-22 | 1 |
| Mgat1         | 0.297477981 | 0.45  | 0.201 | 2.47E-22 | 1 |
| Stxbp3        | 0.295686566 | 0.407 | 0.168 | 3.72E-22 | 1 |
| Eps8          | 0.324399238 | 0.411 | 0.168 | 4.42E-22 | 1 |
| Adam9         | 0.275711751 | 0.353 | 0.134 | 6.74E-22 | 1 |
| Gnaq          | 0.288278159 | 0.34  | 0.126 | 6.83E-22 | 1 |
| Sumo3         | 0.311314329 | 0.57  | 0.325 | 1.17E-21 | 1 |
| mt-Nd4        | 0.280124246 | 0.989 | 0.887 | 1.25E-21 | 1 |

|              |             |       |       |           |   |
|--------------|-------------|-------|-------|-----------|---|
| Cln8         | 0.263968998 | 0.369 | 0.139 | 1.69E-21  | 1 |
| Spi1         | 0.313166023 | 0.901 | 0.509 | 1.81E-21  | 1 |
| Jmjd1c       | 0.286212153 | 0.485 | 0.235 | 1.82E-21  | 1 |
| Mef2a        | 0.295699103 | 0.453 | 0.216 | 1.93E-21  | 1 |
| Apobec1      | 0.285728726 | 0.487 | 0.232 | 1.94E-21  | 1 |
| Cmklr1       | 0.266069946 | 0.303 | 0.093 | 2.28E-21  | 1 |
| Scamp2       | 0.294014246 | 0.533 | 0.281 | 2.89E-21  | 1 |
| Hgsnat       | 0.359531241 | 0.346 | 0.127 | 2.98E-21  | 1 |
| Ifnar2       | 0.269813404 | 0.663 | 0.389 | 3.57E-21  | 1 |
| Tex264       | 0.253548686 | 0.416 | 0.182 | 7.51E-21  | 1 |
| Emp3         | 0.316513899 | 0.949 | 0.694 | 8.16E-21  | 1 |
| Cnpy2        | 0.266518864 | 0.54  | 0.303 | 1.46E-20  | 1 |
| Nckap1l      | 0.275953789 | 0.524 | 0.284 | 1.51E-20  | 1 |
| Fam213b      | 0.311620242 | 0.326 | 0.116 | 2.28E-20  | 1 |
| Mgst3        | 0.272771915 | 0.347 | 0.133 | 5.42E-20  | 1 |
| Dhrs1        | 0.2957365   | 0.388 | 0.174 | 5.84E-20  | 1 |
| Nagpa        | 0.290712385 | 0.404 | 0.19  | 7.44E-20  | 1 |
| Rgs18        | 0.25555497  | 0.28  | 0.093 | 3.09E-19  | 1 |
| Rnaset2a     | 0.303916682 | 0.69  | 0.44  | 3.48E-19  | 1 |
| Hprt         | 0.263416897 | 0.702 | 0.444 | 4.64E-19  | 1 |
| Lgals3bp     | 0.273018476 | 0.593 | 0.321 | 5.04E-19  | 1 |
| Wfdc17       | 0.431873447 | 0.882 | 0.546 | 5.62E-19  | 1 |
| Pdcd2l       | 0.304237524 | 0.353 | 0.154 | 7.90E-19  | 1 |
| Ifitm3       | 0.268822289 | 0.921 | 0.59  | 8.03E-19  | 1 |
| Mfsd11       | 0.308367766 | 0.305 | 0.115 | 1.32E-18  | 1 |
| Eps15        | 0.25503562  | 0.376 | 0.164 | 1.68E-18  | 1 |
| Mknk1        | 0.264222071 | 0.351 | 0.147 | 1.72E-18  | 1 |
| 201011101Rik | 0.406557226 | 0.443 | 0.222 | 1.88E-18  | 1 |
| Xdh          | 0.281554976 | 0.307 | 0.113 | 2.24E-18  | 1 |
| Csf2ra       | 0.250105636 | 0.672 | 0.385 | 2.26E-18  | 1 |
| Jund         | 0.409546836 | 0.937 | 0.823 | 2.75E-18  | 1 |
| Tnfrsf9      | 0.531609978 | 0.263 | 0.086 | 4.46E-18  | 1 |
| Qk           | 0.253098726 | 0.43  | 0.214 | 6.09E-18  | 1 |
| Dpep2        | 0.423533191 | 0.27  | 0.093 | 1.17E-17  | 1 |
| Ywhah        | 0.320697837 | 0.829 | 0.595 | 1.57E-17  | 1 |
| Dusp22       | 0.286127414 | 0.34  | 0.15  | 2.47E-17  | 1 |
| Ppp3ca       | 0.273625034 | 0.526 | 0.304 | 2.93E-17  | 1 |
| Calr         | 0.271630208 | 0.929 | 0.656 | 3.44E-17  | 1 |
| Clec10a      | 0.404713976 | 0.316 | 0.123 | 3.73E-17  | 1 |
| Pnp          | 0.271083168 | 0.619 | 0.368 | 5.83E-17  | 1 |
| Tsc22d3      | 0.310652785 | 0.64  | 0.396 | 7.80E-17  | 1 |
| Gadd45g      | 0.331931044 | 0.362 | 0.161 | 1.59E-16  | 1 |
| Sdf2l1       | 0.250374709 | 0.695 | 0.424 | 1.79E-16  | 1 |
| Neat1        | 0.262372968 | 0.635 | 0.402 | 2.62E-16  | 1 |
| Klf4         | 0.472668322 | 0.563 | 0.337 | 2.71E-16  | 1 |
| Adrb2        | 0.280035273 | 0.34  | 0.146 | 4.98E-16  | 1 |
| Casp4        | 0.286571984 | 0.31  | 0.133 | 8.30E-16  | 1 |
| Zfand5       | 0.253714632 | 0.654 | 0.399 | 9.66E-16  | 1 |
| Tagap        | 0.304544461 | 0.349 | 0.153 | 1.36E-15  | 1 |
| Ptger4       | 0.309029609 | 0.356 | 0.168 | 3.00E-15  | 1 |
| Cept1        | 0.260135742 | 0.432 | 0.238 | 5.50E-15  | 1 |
| Slc39a1      | 0.30199064  | 0.388 | 0.19  | 5.98E-15  | 1 |
| Ier2         | 0.357381803 | 0.868 | 0.675 | 1.01E-14  | 1 |
| Ahnak        | 0.288589808 | 0.621 | 0.4   | 1.21E-14  | 1 |
| Rgl1         | 0.265803218 | 0.256 | 0.098 | 1.76E-14  | 1 |
| Ubc          | 0.26917807  | 0.982 | 0.897 | 2.42E-14  | 1 |
| F11r         | 0.325098507 | 0.261 | 0.106 | 4.72E-14  | 1 |
| Ier5         | 0.272228819 | 0.802 | 0.583 | 7.88E-14  | 1 |
| Ccnd1        | 0.250523575 | 0.279 | 0.123 | 1.06E-12  | 1 |
| Sulf2        | 0.273072479 | 0.293 | 0.15  | 4.16E-11  | 1 |
| Gm6377       | 0.255199258 | 0.39  | 0.238 | 1.08E-09  | 1 |
| Tppp3        | 0.411618182 | 0.279 | 0.143 | 1.55E-09  | 1 |
| Glipr1       | 0.361080179 | 0.501 | 0.399 | 3.00E-06  | 1 |
| Ptprcap      | 1.999221413 | 0.931 | 0.04  | 3.80E-193 | 2 |
| Ii2rb        | 1.837566306 | 0.718 | 0.002 | 9.00E-189 | 2 |
| Gimap3       | 1.622752686 | 0.707 | 0.008 | 4.89E-174 | 2 |
| Gimap4       | 1.949636906 | 0.724 | 0.013 | 2.21E-172 | 2 |
| Ms4a4b       | 2.475343009 | 0.764 | 0.029 | 3.53E-166 | 2 |
| Nkg7         | 3.284150386 | 0.678 | 0.011 | 2.30E-163 | 2 |
| Trbc2        | 1.452475127 | 0.874 | 0.045 | 1.06E-161 | 2 |
| Ctsw         | 1.669902203 | 0.621 | 0.002 | 1.94E-160 | 2 |
| Skap1        | 1.342877834 | 0.747 | 0.025 | 1.11E-155 | 2 |
| Lat          | 1.466011887 | 0.822 | 0.038 | 1.78E-155 | 2 |
| Cd3g         | 2.076315491 | 0.793 | 0.038 | 2.99E-152 | 2 |
| Sept1        | 1.53026759  | 0.81  | 0.046 | 3.45E-149 | 2 |
| Gimap1       | 1.397347939 | 0.73  | 0.027 | 8.79E-149 | 2 |
| Cxcr6        | 1.801450476 | 0.563 | 0     | 1.49E-147 | 2 |



|           |             |       |       |           |   |
|-----------|-------------|-------|-------|-----------|---|
| Sh2d2a    | 1.347959541 | 0.644 | 0.013 | 4.28E-146 | 2 |
| Cd3d      | 1.901405271 | 0.759 | 0.035 | 1.11E-145 | 2 |
| Cd3e      | 1.607300823 | 0.718 | 0.035 | 1.91E-132 | 2 |
| Trbc1     | 1.195355587 | 0.661 | 0.025 | 2.25E-128 | 2 |
| Thy1      | 1.714203396 | 0.799 | 0.072 | 3.07E-128 | 2 |
| Gimap6    | 1.44688093  | 0.776 | 0.065 | 8.68E-125 | 2 |
| Trac      | 1.769744479 | 0.655 | 0.032 | 2.24E-122 | 2 |
| Lck       | 1.211861984 | 0.695 | 0.041 | 9.33E-120 | 2 |
| H2-Q7     | 1.960038532 | 0.954 | 0.218 | 1.00E-119 | 2 |
| Gimap5    | 1.093247249 | 0.523 | 0.012 | 4.75E-115 | 2 |
| Cd2       | 1.333336739 | 0.672 | 0.049 | 4.60E-113 | 2 |
| Zap70     | 0.966683752 | 0.489 | 0.009 | 1.05E-109 | 2 |
| Ltb       | 1.706376261 | 0.776 | 0.087 | 1.28E-109 | 2 |
| AW112010  | 2.599155418 | 0.868 | 0.199 | 1.33E-103 | 2 |
| Gzmb      | 2.149630547 | 0.408 | 0.001 | 1.47E-103 | 2 |
| Ccl5      | 4.449273326 | 0.626 | 0.059 | 1.43E-101 | 2 |
| Tbc1d10c  | 1.13800692  | 0.609 | 0.046 | 6.73E-101 | 2 |
| Ets1      | 1.122461187 | 0.701 | 0.071 | 8.14E-101 | 2 |
| Cd247     | 1.04274502  | 0.54  | 0.029 | 1.76E-94  | 2 |
| Icos      | 1.064728974 | 0.391 | 0.004 | 7.86E-94  | 2 |
| Syt13     | 0.908647661 | 0.356 | 0.004 | 1.66E-84  | 2 |
| Tmsb10    | 1.692898734 | 1     | 0.74  | 3.83E-84  | 2 |
| Ctla2a    | 1.929579528 | 0.552 | 0.061 | 2.04E-79  | 2 |
| H2-Q6     | 1.096443448 | 0.575 | 0.068 | 2.73E-78  | 2 |
| S1pr4     | 0.911311617 | 0.414 | 0.02  | 1.59E-77  | 2 |
| Klk8      | 0.819395964 | 0.362 | 0.011 | 6.37E-76  | 2 |
| Cd28      | 1.008669272 | 0.46  | 0.03  | 8.42E-76  | 2 |
| Gata3     | 0.81404153  | 0.31  | 0.002 | 9.90E-76  | 2 |
| Gimap7    | 0.897427859 | 0.328 | 0.005 | 2.36E-75  | 2 |
| Klrc1     | 1.22987331  | 0.293 | 0     | 6.42E-75  | 2 |
| Hcst      | 1.474230864 | 0.868 | 0.334 | 6.86E-75  | 2 |
| Cst7      | 0.914321723 | 0.437 | 0.031 | 6.91E-74  | 2 |
| Fasl      | 0.729077899 | 0.282 | 0     | 6.08E-72  | 2 |
| Serpina3g | 1.280935925 | 0.42  | 0.027 | 7.48E-72  | 2 |
| Xcl1      | 1.312637443 | 0.293 | 0.002 | 1.60E-71  | 2 |
| Ptpn22    | 1.308945383 | 0.626 | 0.12  | 8.27E-69  | 2 |
| Vps37b    | 1.520387341 | 0.747 | 0.189 | 1.42E-68  | 2 |
| Fam189b   | 0.811686479 | 0.431 | 0.035 | 2.72E-68  | 2 |
| Rps15a    | 0.905597836 | 1     | 0.945 | 3.00E-68  | 2 |
| Tespa1    | 0.714203306 | 0.397 | 0.023 | 1.63E-67  | 2 |
| Bcl11b    | 0.731354729 | 0.391 | 0.021 | 2.87E-67  | 2 |
| Txk       | 0.82203861  | 0.437 | 0.032 | 4.63E-67  | 2 |
| H2-K1     | 1.119375879 | 0.994 | 0.835 | 5.34E-67  | 2 |
| Rps27     | 0.906303562 | 0.994 | 0.986 | 6.51E-67  | 2 |
| Gimap9    | 0.744568011 | 0.425 | 0.031 | 4.32E-66  | 2 |
| Itk       | 0.741552742 | 0.362 | 0.016 | 6.25E-66  | 2 |
| Prf1      | 1.005816066 | 0.264 | 0.001 | 8.77E-66  | 2 |
| Rpl13a    | 1.178017881 | 0.989 | 0.805 | 9.57E-66  | 2 |
| Shisa5    | 1.209092109 | 0.977 | 0.766 | 4.13E-64  | 2 |
| Rac2      | 1.222527054 | 0.971 | 0.706 | 1.09E-63  | 2 |
| Itgb7     | 1.230861578 | 0.649 | 0.142 | 3.13E-62  | 2 |
| Ccdc88c   | 0.677298009 | 0.362 | 0.022 | 5.28E-62  | 2 |
| Lax1      | 0.509768779 | 0.253 | 0.002 | 4.35E-61  | 2 |
| Ikzf3     | 0.652836691 | 0.287 | 0.007 | 1.25E-60  | 2 |
| Gm11808   | 1.105781386 | 0.977 | 0.706 | 9.85E-59  | 2 |
| Klrk1     | 1.310673244 | 0.448 | 0.056 | 1.69E-58  | 2 |
| Il18r1    | 0.757008824 | 0.253 | 0.004 | 3.02E-58  | 2 |
| Rpl27     | 0.878407912 | 0.994 | 0.882 | 3.92E-58  | 2 |
| Rpl19     | 0.668554563 | 1     | 0.947 | 1.92E-57  | 2 |
| Rps7      | 0.774371189 | 0.994 | 0.935 | 3.23E-57  | 2 |
| Tnfrsf18  | 1.180388357 | 0.391 | 0.036 | 3.41E-57  | 2 |
| F2r       | 0.686589491 | 0.345 | 0.025 | 6.48E-55  | 2 |
| Rps3      | 0.678657656 | 0.994 | 0.945 | 1.32E-54  | 2 |
| Rpl38     | 0.689276326 | 0.989 | 0.948 | 4.35E-54  | 2 |
| Rps16     | 0.670906023 | 1     | 0.967 | 7.91E-54  | 2 |
| Hsd11b1   | 0.763553767 | 0.368 | 0.035 | 1.53E-52  | 2 |
| Ablim1    | 0.641768753 | 0.362 | 0.032 | 2.80E-52  | 2 |
| Dusp5     | 1.178740766 | 0.736 | 0.239 | 2.86E-52  | 2 |
| Gzma      | 3.187753073 | 0.264 | 0.01  | 3.03E-52  | 2 |
| Jakmip1   | 0.576172292 | 0.322 | 0.02  | 3.98E-52  | 2 |
| Rps24     | 0.6872942   | 0.994 | 0.947 | 4.45E-52  | 2 |
| Sh2d1a    | 0.597278249 | 0.322 | 0.02  | 4.76E-52  | 2 |
| Bcl2      | 1.360237078 | 0.615 | 0.167 | 5.91E-52  | 2 |
| Rpl18a    | 0.634472764 | 0.994 | 0.979 | 1.08E-51  | 2 |
| Rpl18     | 0.655964916 | 0.994 | 0.921 | 9.90E-51  | 2 |
| Klrd1     | 1.29731141  | 0.443 | 0.065 | 2.25E-50  | 2 |
| Cd7       | 0.999307556 | 0.31  | 0.021 | 2.95E-50  | 2 |

|           |             |       |       |          |   |
|-----------|-------------|-------|-------|----------|---|
| Ppp1r16b  | 0.633730631 | 0.374 | 0.036 | 3.78E-50 | 2 |
| Serpinb9  | 0.985325446 | 0.368 | 0.039 | 4.76E-50 | 2 |
| Rpl23a    | 0.61107281  | 1     | 0.955 | 7.91E-50 | 2 |
| Cd82      | 1.177432549 | 0.73  | 0.28  | 1.58E-49 | 2 |
| Pcd4      | 1.059565633 | 0.603 | 0.158 | 1.62E-49 | 2 |
| Rasal3    | 0.776206719 | 0.489 | 0.09  | 1.98E-49 | 2 |
| Prkcq     | 0.560703368 | 0.276 | 0.014 | 3.74E-49 | 2 |
| Gm8369    | 0.743624611 | 0.322 | 0.025 | 7.05E-49 | 2 |
| Il2rg     | 1.028964974 | 0.736 | 0.282 | 8.41E-49 | 2 |
| Rpsa      | 0.762735918 | 0.994 | 0.891 | 2.26E-48 | 2 |
| Rpl9      | 0.616590762 | 1     | 0.95  | 4.14E-48 | 2 |
| Lamb3     | 0.58388447  | 0.27  | 0.014 | 4.29E-48 | 2 |
| Rplp2     | 0.594428735 | 1     | 0.962 | 4.83E-48 | 2 |
| Rpl4      | 0.672254292 | 1     | 0.918 | 1.93E-47 | 2 |
| Dusp2     | 1.491511073 | 0.644 | 0.195 | 4.09E-47 | 2 |
| Serpinb6b | 0.854229143 | 0.356 | 0.04  | 5.57E-47 | 2 |
| Rpl37a    | 0.565240472 | 0.994 | 0.985 | 1.25E-46 | 2 |
| Limd2     | 0.957057094 | 0.868 | 0.473 | 1.57E-46 | 2 |
| Ccnd2     | 0.982773743 | 0.695 | 0.234 | 5.77E-46 | 2 |
| Rpl17     | 0.62964544  | 0.994 | 0.962 | 2.51E-45 | 2 |
| Rps3a1    | 0.575069187 | 0.994 | 0.947 | 1.13E-44 | 2 |
| Rpl39     | 0.617391229 | 1     | 0.944 | 5.42E-44 | 2 |
| Phgdh     | 0.541403377 | 0.339 | 0.037 | 4.76E-43 | 2 |
| Uba52     | 0.869388357 | 0.914 | 0.587 | 4.94E-43 | 2 |
| Rps13     | 0.5691045   | 0.994 | 0.941 | 6.82E-43 | 2 |
| Selplg    | 0.881882545 | 0.92  | 0.62  | 1.01E-42 | 2 |
| Acap1     | 0.662150983 | 0.345 | 0.042 | 1.14E-42 | 2 |
| Cxcr3     | 0.836538522 | 0.397 | 0.064 | 1.33E-42 | 2 |
| Rps6      | 0.611163915 | 1     | 0.95  | 1.41E-42 | 2 |
| Cish      | 0.795456825 | 0.356 | 0.048 | 2.86E-42 | 2 |
| Anxa6     | 0.97855022  | 0.724 | 0.332 | 5.07E-42 | 2 |
| Rps21     | 0.676661291 | 0.989 | 0.899 | 5.76E-42 | 2 |
| Eef1a1    | 0.531194705 | 1     | 0.969 | 8.59E-42 | 2 |
| Rpl12     | 0.863196896 | 0.96  | 0.855 | 1.17E-41 | 2 |
| Rps23     | 0.521522222 | 1     | 0.966 | 1.27E-41 | 2 |
| Rps5      | 0.571875931 | 0.994 | 0.952 | 2.40E-41 | 2 |
| Rpl36     | 0.588098824 | 0.989 | 0.933 | 1.29E-40 | 2 |
| Btg1      | 0.814166467 | 0.989 | 0.788 | 1.71E-40 | 2 |
| Sept6     | 0.752015655 | 0.483 | 0.107 | 2.53E-40 | 2 |
| Rhof      | 0.571677243 | 0.322 | 0.038 | 3.25E-40 | 2 |
| Rora      | 0.863287899 | 0.362 | 0.056 | 5.92E-40 | 2 |
| Rps15     | 0.576875706 | 0.994 | 0.939 | 6.10E-40 | 2 |
| Cd69      | 0.909495378 | 0.448 | 0.091 | 6.15E-40 | 2 |
| Rpl8      | 0.580734369 | 1     | 0.935 | 6.55E-40 | 2 |
| Rplp0     | 0.567521883 | 1     | 0.963 | 8.39E-40 | 2 |
| Cd8b1     | 1.151367179 | 0.322 | 0.035 | 1.22E-39 | 2 |
| H2-Q4     | 0.972943276 | 0.621 | 0.232 | 4.58E-39 | 2 |
| Rpl32     | 0.531728137 | 0.994 | 0.955 | 9.55E-39 | 2 |
| Rps18     | 0.649999811 | 0.994 | 0.945 | 9.84E-39 | 2 |
| Il7r      | 1.115107067 | 0.391 | 0.074 | 2.91E-38 | 2 |
| Tcf7      | 0.339022887 | 0.305 | 0.031 | 7.58E-38 | 2 |
| Rpl21     | 0.513280786 | 0.994 | 0.953 | 7.60E-38 | 2 |
| Eef2      | 0.650683382 | 0.994 | 0.877 | 9.50E-38 | 2 |
| Rpl11     | 0.491800723 | 1     | 0.945 | 1.62E-37 | 2 |
| Rps10     | 0.591567218 | 0.989 | 0.907 | 1.88E-37 | 2 |
| Tecpr1    | 0.737274037 | 0.471 | 0.118 | 1.14E-36 | 2 |
| Rpl34     | 0.497083753 | 0.994 | 0.956 | 2.81E-36 | 2 |
| Cd8a      | 0.904551468 | 0.299 | 0.034 | 5.38E-36 | 2 |
| Rps14     | 0.503631658 | 1     | 0.97  | 1.48E-35 | 2 |
| Rpl13     | 0.49089725  | 0.994 | 0.972 | 3.86E-35 | 2 |
| B4galnt1  | 0.857175448 | 0.684 | 0.323 | 4.90E-35 | 2 |
| Tpt1      | 0.436875209 | 0.994 | 0.975 | 1.17E-34 | 2 |
| Rpl30     | 0.552892742 | 0.989 | 0.912 | 1.59E-34 | 2 |
| Rplp1     | 0.526216518 | 1     | 0.962 | 1.66E-34 | 2 |
| Gramd3    | 0.817433156 | 0.408 | 0.088 | 3.99E-34 | 2 |
| Itgal     | 0.586460732 | 0.454 | 0.103 | 1.45E-33 | 2 |
| Pkp3      | 0.709105401 | 0.339 | 0.059 | 2.52E-33 | 2 |
| Rpl3      | 0.53821535  | 0.994 | 0.919 | 5.38E-33 | 2 |
| Arhgef1   | 0.824941414 | 0.672 | 0.326 | 6.65E-33 | 2 |
| Cnn2      | 0.807762486 | 0.81  | 0.515 | 8.52E-33 | 2 |
| Rpl27a    | 0.482466335 | 0.994 | 0.94  | 3.30E-32 | 2 |
| Rpl23     | 0.444593978 | 0.989 | 0.96  | 8.42E-32 | 2 |
| Prkca     | 0.5781061   | 0.287 | 0.04  | 1.22E-31 | 2 |
| Cd27      | 0.474836956 | 0.351 | 0.064 | 6.67E-31 | 2 |
| Spn       | 0.605308034 | 0.425 | 0.105 | 1.57E-30 | 2 |
| Snrpg     | 0.698715172 | 0.902 | 0.694 | 1.78E-30 | 2 |
| Rpl5      | 0.610915315 | 0.96  | 0.839 | 2.24E-30 | 2 |

|               |             |       |       |          |   |
|---------------|-------------|-------|-------|----------|---|
| Rpl29         | 0.463607547 | 0.983 | 0.894 | 3.59E-30 | 2 |
| Prdx6         | 0.683427788 | 0.805 | 0.495 | 3.76E-30 | 2 |
| Tnfaip3       | 0.884411252 | 0.747 | 0.395 | 4.19E-30 | 2 |
| Camk2n1       | 0.58560269  | 0.287 | 0.045 | 4.40E-30 | 2 |
| Pabpc1        | 0.578934389 | 0.948 | 0.823 | 6.99E-30 | 2 |
| Rpl14         | 0.464408564 | 0.994 | 0.944 | 8.86E-30 | 2 |
| Gstp1         | 0.839236704 | 0.523 | 0.191 | 1.09E-29 | 2 |
| Rps11         | 0.442871804 | 0.994 | 0.948 | 5.11E-29 | 2 |
| Emb           | 0.997739644 | 0.701 | 0.383 | 6.40E-29 | 2 |
| Rpl37         | 0.435915753 | 0.994 | 0.963 | 8.02E-29 | 2 |
| Hbb-bs        | 0.483787801 | 0.724 | 0.315 | 8.79E-29 | 2 |
| Rps28         | 0.490620233 | 0.994 | 0.957 | 1.40E-28 | 2 |
| Smad7         | 0.669146519 | 0.362 | 0.084 | 2.64E-28 | 2 |
| Rpl41         | 0.34232028  | 1     | 0.994 | 4.88E-28 | 2 |
| Saraf         | 0.688521404 | 0.856 | 0.619 | 7.05E-28 | 2 |
| Glipr2        | 0.606594492 | 0.454 | 0.133 | 1.69E-27 | 2 |
| Fam107b       | 0.673842167 | 0.592 | 0.245 | 2.34E-27 | 2 |
| Rinl          | 0.697056523 | 0.466 | 0.163 | 3.59E-27 | 2 |
| Bin2          | 0.800061309 | 0.695 | 0.39  | 3.85E-27 | 2 |
| S100a10       | 0.695842152 | 0.937 | 0.712 | 5.31E-27 | 2 |
| Ptpn18        | 0.602699104 | 0.92  | 0.725 | 1.24E-26 | 2 |
| Rps4x         | 0.444347749 | 1     | 0.929 | 1.92E-26 | 2 |
| Apobec3       | 0.710515751 | 0.69  | 0.383 | 3.92E-26 | 2 |
| Gnas          | 0.577035565 | 0.96  | 0.81  | 8.29E-26 | 2 |
| Eef1g         | 0.563956699 | 0.96  | 0.807 | 9.89E-26 | 2 |
| Rpl15         | 0.420917743 | 1     | 0.922 | 9.94E-26 | 2 |
| Rps20         | 0.508576866 | 0.994 | 0.91  | 1.03E-25 | 2 |
| Rpl27-ps3     | 0.635721347 | 0.724 | 0.445 | 1.08E-25 | 2 |
| Ncor1         | 0.668373313 | 0.73  | 0.449 | 1.31E-25 | 2 |
| Acot7         | 0.630090517 | 0.454 | 0.159 | 1.57E-25 | 2 |
| Leprotl1      | 0.660806161 | 0.655 | 0.382 | 3.03E-25 | 2 |
| Vasp          | 0.584793002 | 0.816 | 0.542 | 5.63E-25 | 2 |
| Arhgdib       | 0.523100416 | 0.96  | 0.835 | 7.56E-25 | 2 |
| Rasgrp2       | 0.532904781 | 0.374 | 0.095 | 7.69E-25 | 2 |
| Arl2bp        | 0.653125093 | 0.5   | 0.2   | 7.80E-25 | 2 |
| Ifngr1        | 0.808240877 | 0.897 | 0.743 | 1.29E-24 | 2 |
| Rps2          | 0.478851262 | 0.983 | 0.938 | 1.46E-24 | 2 |
| H2-D1         | 0.415447664 | 0.994 | 0.955 | 1.60E-24 | 2 |
| Padi2         | 0.564530204 | 0.259 | 0.047 | 2.25E-24 | 2 |
| Rpl13a-ps1    | 0.642339168 | 0.408 | 0.132 | 5.57E-24 | 2 |
| Bhlhe40       | 0.90551793  | 0.563 | 0.238 | 8.95E-24 | 2 |
| Id2           | 0.816622765 | 0.839 | 0.543 | 9.21E-24 | 2 |
| Gpr171        | 0.630253925 | 0.42  | 0.127 | 1.36E-23 | 2 |
| Jak1          | 0.635147113 | 0.753 | 0.49  | 1.54E-23 | 2 |
| Pla2g16       | 0.723033977 | 0.46  | 0.177 | 1.68E-23 | 2 |
| Rpl6          | 0.402268219 | 1     | 0.947 | 1.87E-23 | 2 |
| Gramd1a       | 0.607122855 | 0.454 | 0.165 | 2.66E-23 | 2 |
| Nop53         | 0.594381589 | 0.839 | 0.658 | 2.77E-23 | 2 |
| Coro1a        | 0.503467932 | 0.983 | 0.815 | 2.94E-23 | 2 |
| Vgll4         | 0.750333072 | 0.454 | 0.17  | 4.53E-23 | 2 |
| Aes           | 0.581595122 | 0.776 | 0.551 | 6.00E-23 | 2 |
| Zfp36l2       | 0.815842017 | 0.805 | 0.642 | 9.73E-23 | 2 |
| Rpl7          | 0.362092648 | 1     | 0.925 | 9.73E-23 | 2 |
| Rpl24         | 0.367756722 | 0.983 | 0.926 | 2.97E-22 | 2 |
| Fkbp3         | 0.614563737 | 0.626 | 0.356 | 4.19E-22 | 2 |
| D16Erttd472e  | 0.518348824 | 0.293 | 0.068 | 4.88E-22 | 2 |
| Gem           | 0.706051341 | 0.259 | 0.052 | 6.37E-22 | 2 |
| Cd52          | 0.515777198 | 0.994 | 0.865 | 7.13E-22 | 2 |
| Rnf138        | 0.65589916  | 0.448 | 0.175 | 8.19E-22 | 2 |
| Grap          | 0.653261698 | 0.443 | 0.161 | 8.22E-22 | 2 |
| Rpl35         | 0.460968511 | 0.977 | 0.922 | 1.33E-21 | 2 |
| Rpl36a        | 0.463470904 | 0.948 | 0.895 | 7.66E-21 | 2 |
| Rpl22l1       | 0.531992131 | 0.937 | 0.796 | 7.96E-21 | 2 |
| Eef1b2        | 0.472201429 | 0.914 | 0.776 | 1.49E-20 | 2 |
| Rack1         | 0.451825582 | 0.937 | 0.844 | 1.96E-20 | 2 |
| Ccnd3         | 0.624655594 | 0.649 | 0.381 | 2.16E-20 | 2 |
| 4930523C07Rik | 0.627194771 | 0.431 | 0.162 | 2.20E-20 | 2 |
| Psmb8         | 0.506876032 | 0.891 | 0.726 | 2.76E-20 | 2 |
| Ptpn7         | 0.561425876 | 0.402 | 0.145 | 3.15E-20 | 2 |
| Rpl22         | 0.409423261 | 0.943 | 0.864 | 8.74E-20 | 2 |
| Rpl10a        | 0.394856316 | 0.977 | 0.915 | 1.49E-19 | 2 |
| Arhgap45      | 0.484941376 | 0.747 | 0.484 | 2.64E-19 | 2 |
| Gm9844        | 0.523981225 | 0.322 | 0.099 | 4.27E-19 | 2 |
| Cnbp          | 0.456494774 | 0.908 | 0.743 | 4.47E-19 | 2 |
| Rps8          | 0.348149711 | 0.994 | 0.95  | 5.73E-19 | 2 |
| Hmgb2         | 0.817973677 | 0.724 | 0.51  | 5.77E-19 | 2 |
| Rasgrp1       | 0.505046703 | 0.27  | 0.066 | 6.35E-19 | 2 |

|           |             |       |       |          |   |
|-----------|-------------|-------|-------|----------|---|
| Rbm39     | 0.465005799 | 0.943 | 0.808 | 7.51E-19 | 2 |
| Fyn       | 0.534688797 | 0.431 | 0.18  | 8.64E-19 | 2 |
| Traf3ip3  | 0.495503873 | 0.316 | 0.093 | 1.45E-18 | 2 |
| H2-T22    | 0.707651558 | 0.529 | 0.294 | 3.65E-18 | 2 |
| Socs1     | 0.403655532 | 0.264 | 0.063 | 3.82E-18 | 2 |
| Eif3f     | 0.426719529 | 0.971 | 0.838 | 5.61E-18 | 2 |
| Ezr       | 0.420029405 | 0.603 | 0.326 | 6.49E-18 | 2 |
| Cd37      | 0.574489448 | 0.718 | 0.471 | 7.80E-18 | 2 |
| Snrpf     | 0.461122586 | 0.793 | 0.62  | 1.04E-17 | 2 |
| Sept9     | 0.553787427 | 0.5   | 0.255 | 1.64E-17 | 2 |
| Prkch     | 0.627907017 | 0.368 | 0.143 | 2.34E-17 | 2 |
| Evl       | 0.605019746 | 0.592 | 0.352 | 2.42E-17 | 2 |
| Eif3e     | 0.495902628 | 0.805 | 0.654 | 2.47E-17 | 2 |
| Npm1      | 0.466057349 | 0.897 | 0.78  | 2.94E-17 | 2 |
| Ptprc     | 0.559532725 | 0.793 | 0.631 | 4.98E-17 | 2 |
| Sp100     | 0.614666907 | 0.609 | 0.374 | 5.00E-17 | 2 |
| Ppp1r12a  | 0.548380997 | 0.603 | 0.386 | 5.46E-17 | 2 |
| Ppp1cc    | 0.517480203 | 0.747 | 0.571 | 8.49E-17 | 2 |
| Chd3      | 0.513060801 | 0.333 | 0.116 | 2.24E-16 | 2 |
| Hba-a1    | 0.350471292 | 0.46  | 0.203 | 3.23E-16 | 2 |
| Rbm3      | 0.432751376 | 0.879 | 0.705 | 4.02E-16 | 2 |
| Sub1      | 0.381010908 | 0.966 | 0.835 | 4.66E-16 | 2 |
| Def6      | 0.527488691 | 0.408 | 0.181 | 5.54E-16 | 2 |
| Rps19     | 0.366185586 | 1     | 0.951 | 7.56E-16 | 2 |
| Ldha      | 0.452347273 | 0.885 | 0.75  | 1.46E-15 | 2 |
| Dad1      | 0.472411256 | 0.856 | 0.743 | 2.32E-15 | 2 |
| Vps28     | 0.49438843  | 0.707 | 0.526 | 2.49E-15 | 2 |
| Prkar1a   | 0.443559867 | 0.759 | 0.587 | 6.72E-15 | 2 |
| Mbnl1     | 0.578482301 | 0.678 | 0.531 | 8.27E-15 | 2 |
| Rps26     | 0.371557431 | 0.977 | 0.925 | 9.22E-15 | 2 |
| Dnajc9    | 0.498342008 | 0.368 | 0.153 | 9.25E-15 | 2 |
| B2m       | 0.283085452 | 0.994 | 0.971 | 1.02E-14 | 2 |
| Ppp1ca    | 0.410212847 | 0.885 | 0.808 | 1.24E-14 | 2 |
| Abhd8     | 0.377086325 | 0.27  | 0.084 | 1.68E-14 | 2 |
| Atp5h     | 0.332693607 | 0.914 | 0.839 | 2.16E-14 | 2 |
| Ifi47     | 0.516874429 | 0.425 | 0.197 | 2.50E-14 | 2 |
| Rpl35a    | 0.253717585 | 0.994 | 0.965 | 6.03E-14 | 2 |
| Arhgap31  | 0.594486875 | 0.471 | 0.246 | 6.03E-14 | 2 |
| Ly6c2     | 1.24473543  | 0.299 | 0.105 | 7.99E-14 | 2 |
| Stk17b    | 0.395540526 | 0.73  | 0.54  | 1.33E-13 | 2 |
| Ddx5      | 0.378477331 | 0.977 | 0.899 | 1.33E-13 | 2 |
| Rps12     | 0.325591857 | 0.971 | 0.915 | 1.35E-13 | 2 |
| Rps29     | 0.279792233 | 0.994 | 0.994 | 1.50E-13 | 2 |
| Rapgef6   | 0.453148533 | 0.339 | 0.145 | 3.58E-13 | 2 |
| Rpl7a     | 0.309273767 | 0.954 | 0.873 | 3.68E-13 | 2 |
| Cdc42ep3  | 0.448475352 | 0.368 | 0.163 | 3.85E-13 | 2 |
| Rhoh      | 0.394263695 | 0.443 | 0.221 | 4.71E-13 | 2 |
| Eif3h     | 0.380372385 | 0.851 | 0.768 | 6.23E-13 | 2 |
| Psip1     | 0.409956809 | 0.305 | 0.117 | 8.10E-13 | 2 |
| Stk24     | 0.559037545 | 0.557 | 0.378 | 8.94E-13 | 2 |
| Gabarapl2 | 0.40327333  | 0.741 | 0.592 | 1.02E-12 | 2 |
| Gm8186    | 0.4355551   | 0.46  | 0.263 | 1.04E-12 | 2 |
| Cirbp     | 0.456135323 | 0.5   | 0.287 | 1.27E-12 | 2 |
| Naca      | 0.28589616  | 0.96  | 0.905 | 1.94E-12 | 2 |
| Znrf1     | 0.473759687 | 0.391 | 0.186 | 2.06E-12 | 2 |
| Csnk2b    | 0.377454864 | 0.632 | 0.475 | 2.13E-12 | 2 |
| Elf1      | 0.49672559  | 0.489 | 0.302 | 2.66E-12 | 2 |
| Esyt1     | 0.583443316 | 0.42  | 0.237 | 2.83E-12 | 2 |
| Oaz1      | 0.264518184 | 0.994 | 0.938 | 3.57E-12 | 2 |
| Sumo2     | 0.344367753 | 0.914 | 0.79  | 4.48E-12 | 2 |
| Mfng      | 0.371092936 | 0.31  | 0.128 | 6.13E-12 | 2 |
| Pnrc1     | 0.365600616 | 0.856 | 0.734 | 6.88E-12 | 2 |
| Grcc10    | 0.479049752 | 0.5   | 0.32  | 7.28E-12 | 2 |
| Arhgap15  | 0.432086385 | 0.42  | 0.217 | 8.01E-12 | 2 |
| Slc7a6os  | 0.424529806 | 0.253 | 0.09  | 9.46E-12 | 2 |
| Xist      | 0.420513229 | 0.891 | 0.77  | 9.72E-12 | 2 |
| Zc3hav1   | 0.62045559  | 0.5   | 0.323 | 1.04E-11 | 2 |
| Tra2b     | 0.453510983 | 0.718 | 0.597 | 1.07E-11 | 2 |
| Lrrfip1   | 0.416882855 | 0.621 | 0.44  | 1.11E-11 | 2 |
| Btf3      | 0.26082287  | 0.983 | 0.877 | 1.79E-11 | 2 |
| Ndufa4    | 0.353499246 | 0.862 | 0.753 | 2.58E-11 | 2 |
| Gpr132    | 0.496031305 | 0.437 | 0.238 | 3.18E-11 | 2 |
| Hmgb1     | 0.276866298 | 0.874 | 0.778 | 3.30E-11 | 2 |
| Serbp1    | 0.334575374 | 0.816 | 0.732 | 3.41E-11 | 2 |
| Gtf2i     | 0.491865438 | 0.287 | 0.121 | 3.49E-11 | 2 |
| Lbr       | 0.416024877 | 0.408 | 0.216 | 3.49E-11 | 2 |
| Cct7      | 0.390836139 | 0.655 | 0.535 | 3.51E-11 | 2 |

|          |             |       |       |          |   |
|----------|-------------|-------|-------|----------|---|
| Tbrg1    | 0.420272968 | 0.466 | 0.284 | 4.98E-11 | 2 |
| Ly9      | 0.357613439 | 0.322 | 0.143 | 5.62E-11 | 2 |
| Krtcap2  | 0.411264235 | 0.73  | 0.62  | 5.74E-11 | 2 |
| Ly6a     | 0.955119396 | 0.448 | 0.259 | 7.87E-11 | 2 |
| Rgs1     | 0.44807845  | 0.741 | 0.481 | 9.99E-11 | 2 |
| Sri      | 0.347652921 | 0.782 | 0.649 | 9.99E-11 | 2 |
| Ankrd44  | 0.442007072 | 0.466 | 0.281 | 1.04E-10 | 2 |
| Slc38a1  | 0.526165341 | 0.443 | 0.264 | 1.07E-10 | 2 |
| Ubal2    | 0.59645401  | 0.598 | 0.489 | 1.30E-10 | 2 |
| Atp5g3   | 0.318281849 | 0.672 | 0.532 | 1.72E-10 | 2 |
| Rgcc     | 0.637971598 | 0.287 | 0.115 | 2.02E-10 | 2 |
| Npm3     | 0.479118362 | 0.5   | 0.349 | 2.10E-10 | 2 |
| Hnrnpf   | 0.306646298 | 0.902 | 0.806 | 2.60E-10 | 2 |
| Psme1    | 0.376052885 | 0.736 | 0.638 | 3.02E-10 | 2 |
| Traf1    | 0.423894797 | 0.356 | 0.174 | 3.19E-10 | 2 |
| Emg1     | 0.385911001 | 0.626 | 0.5   | 3.27E-10 | 2 |
| Srsf5    | 0.280741548 | 0.885 | 0.776 | 3.63E-10 | 2 |
| Hba-a2   | 0.334742605 | 0.356 | 0.172 | 3.72E-10 | 2 |
| Srpk1    | 0.436701888 | 0.356 | 0.185 | 4.36E-10 | 2 |
| Vars     | 0.447928519 | 0.333 | 0.165 | 4.63E-10 | 2 |
| Tecr     | 0.460962933 | 0.563 | 0.421 | 4.94E-10 | 2 |
| Uqcrh    | 0.300142048 | 0.891 | 0.855 | 5.49E-10 | 2 |
| Eif4a2   | 0.492167552 | 0.667 | 0.546 | 5.61E-10 | 2 |
| Mif      | 0.340743896 | 0.707 | 0.576 | 6.68E-10 | 2 |
| Tcf3     | 0.417839334 | 0.328 | 0.166 | 7.39E-10 | 2 |
| Yaf2     | 0.361686441 | 0.299 | 0.14  | 1.09E-09 | 2 |
| Sms      | 0.411065064 | 0.339 | 0.182 | 1.24E-09 | 2 |
| Slc9a3r1 | 0.377217501 | 0.54  | 0.395 | 1.40E-09 | 2 |
| Sp110    | 0.412291443 | 0.46  | 0.292 | 1.51E-09 | 2 |
| Dnajc15  | 0.502133958 | 0.569 | 0.466 | 1.77E-09 | 2 |
| Itpkb    | 0.400546349 | 0.391 | 0.22  | 1.77E-09 | 2 |
| Raly     | 0.362082054 | 0.701 | 0.611 | 2.04E-09 | 2 |
| Myl12b   | 0.29818807  | 0.793 | 0.678 | 2.12E-09 | 2 |
| Rpl31    | 0.250933517 | 0.983 | 0.931 | 2.12E-09 | 2 |
| Pitpnc1  | 0.426316417 | 0.276 | 0.124 | 2.16E-09 | 2 |
| Rwdd1    | 0.406908832 | 0.58  | 0.436 | 2.22E-09 | 2 |
| Riok1    | 0.437594871 | 0.259 | 0.114 | 2.29E-09 | 2 |
| Grk6     | 0.369850759 | 0.368 | 0.2   | 2.29E-09 | 2 |
| Psemb3   | 0.292736752 | 0.839 | 0.719 | 2.34E-09 | 2 |
| Rps27rt  | 0.360748052 | 0.764 | 0.681 | 2.55E-09 | 2 |
| Med10    | 0.471600328 | 0.454 | 0.318 | 2.77E-09 | 2 |
| Lsm5     | 0.395240139 | 0.552 | 0.42  | 2.93E-09 | 2 |
| Slc44a2  | 0.366416459 | 0.31  | 0.149 | 3.02E-09 | 2 |
| Junb     | 0.447069003 | 0.966 | 0.886 | 3.33E-09 | 2 |
| Hilpda   | 0.753869767 | 0.339 | 0.179 | 3.66E-09 | 2 |
| Nsd3     | 0.438537623 | 0.443 | 0.288 | 4.14E-09 | 2 |
| Nabp1    | 0.467388883 | 0.333 | 0.169 | 4.30E-09 | 2 |
| Ptp4a3   | 0.401364172 | 0.322 | 0.162 | 4.82E-09 | 2 |
| Hnrnpa3  | 0.342416906 | 0.787 | 0.691 | 5.95E-09 | 2 |
| Snrnp48  | 0.422893677 | 0.368 | 0.212 | 6.18E-09 | 2 |
| Runx3    | 0.466847352 | 0.402 | 0.243 | 6.56E-09 | 2 |
| Eef1d    | 0.283483977 | 0.799 | 0.714 | 6.68E-09 | 2 |
| Ube2s    | 0.337980306 | 0.707 | 0.6   | 7.88E-09 | 2 |
| Snrnp70  | 0.384277538 | 0.592 | 0.48  | 9.12E-09 | 2 |
| Psemb9   | 0.40761464  | 0.563 | 0.418 | 9.41E-09 | 2 |
| Lbh      | 0.32268339  | 0.391 | 0.227 | 1.06E-08 | 2 |
| Trp53    | 0.363012513 | 0.454 | 0.312 | 1.08E-08 | 2 |
| Psemb1   | 0.267349397 | 0.845 | 0.761 | 1.24E-08 | 2 |
| Mettl23  | 0.408106318 | 0.454 | 0.312 | 1.49E-08 | 2 |
| Dock10   | 0.408225058 | 0.437 | 0.285 | 1.74E-08 | 2 |
| Dok2     | 0.327163096 | 0.546 | 0.347 | 2.18E-08 | 2 |
| Crem     | 0.617485669 | 0.351 | 0.201 | 2.22E-08 | 2 |
| Tuba4a   | 0.454443362 | 0.282 | 0.137 | 2.37E-08 | 2 |
| Gbp7     | 0.377055396 | 0.293 | 0.145 | 2.46E-08 | 2 |
| Arl6ip5  | 0.396518181 | 0.672 | 0.571 | 2.55E-08 | 2 |
| Clint1   | 0.438744932 | 0.397 | 0.247 | 2.68E-08 | 2 |
| Ncl      | 0.352107525 | 0.701 | 0.636 | 2.75E-08 | 2 |
| Arl6ip1  | 0.391628316 | 0.759 | 0.676 | 3.01E-08 | 2 |
| Epsti1   | 0.415222402 | 0.563 | 0.426 | 3.03E-08 | 2 |
| Ogt      | 0.461513681 | 0.368 | 0.216 | 3.03E-08 | 2 |
| Snrpd2   | 0.310277084 | 0.707 | 0.627 | 3.34E-08 | 2 |
| Sash3    | 0.381615089 | 0.339 | 0.186 | 3.72E-08 | 2 |
| Dut      | 0.376815359 | 0.27  | 0.129 | 4.09E-08 | 2 |
| Erh      | 0.353732585 | 0.54  | 0.395 | 4.58E-08 | 2 |
| Gpr183   | 0.577067694 | 0.402 | 0.26  | 4.67E-08 | 2 |
| Ppp1r18  | 0.319159739 | 0.626 | 0.524 | 4.71E-08 | 2 |
| Eno1     | 0.250680311 | 0.822 | 0.693 | 5.07E-08 | 2 |

|          |             |       |       |          |   |
|----------|-------------|-------|-------|----------|---|
| Abrac1   | 0.300965014 | 0.736 | 0.652 | 5.23E-08 | 2 |
| Dnaja1   | 0.306371347 | 0.73  | 0.646 | 5.41E-08 | 2 |
| Tapbpl   | 0.319939038 | 0.27  | 0.132 | 6.92E-08 | 2 |
| Slc50a1  | 0.375897203 | 0.379 | 0.235 | 7.34E-08 | 2 |
| Psme2    | 0.304959878 | 0.736 | 0.64  | 7.77E-08 | 2 |
| St3gal6  | 0.275574962 | 0.42  | 0.245 | 8.43E-08 | 2 |
| Cnp      | 0.412509748 | 0.414 | 0.275 | 8.66E-08 | 2 |
| Lfng     | 0.459209806 | 0.511 | 0.378 | 8.85E-08 | 2 |
| Pnir     | 0.390265286 | 0.425 | 0.28  | 8.97E-08 | 2 |
| Pole4    | 0.352577731 | 0.54  | 0.434 | 9.59E-08 | 2 |
| Sept11   | 0.457272053 | 0.305 | 0.163 | 9.95E-08 | 2 |
| Ankrd11  | 0.404400209 | 0.603 | 0.509 | 1.15E-07 | 2 |
| Srrm2    | 0.353615345 | 0.672 | 0.574 | 1.24E-07 | 2 |
| Mrpl58   | 0.33878834  | 0.42  | 0.283 | 1.25E-07 | 2 |
| Tma7     | 0.260614539 | 0.833 | 0.794 | 1.32E-07 | 2 |
| Pik3r1   | 0.416367587 | 0.408 | 0.274 | 1.36E-07 | 2 |
| Dazap1   | 0.354360401 | 0.471 | 0.333 | 1.39E-07 | 2 |
| Taf1d    | 0.313939076 | 0.402 | 0.255 | 1.60E-07 | 2 |
| Gpsm3    | 0.294930781 | 0.695 | 0.619 | 1.68E-07 | 2 |
| Mat2b    | 0.348596336 | 0.489 | 0.372 | 1.91E-07 | 2 |
| Ppm1g    | 0.389900743 | 0.437 | 0.319 | 2.05E-07 | 2 |
| Irf8     | 0.398783    | 0.218 | 0.496 | 2.30E-07 | 2 |
| Cbx3     | 0.417515576 | 0.397 | 0.255 | 2.58E-07 | 2 |
| Nt5c     | 0.365844395 | 0.557 | 0.463 | 2.79E-07 | 2 |
| Ccnl2    | 0.329205074 | 0.46  | 0.332 | 3.02E-07 | 2 |
| S100a13  | 0.337972403 | 0.695 | 0.639 | 3.18E-07 | 2 |
| Snrpe    | 0.322906599 | 0.713 | 0.655 | 3.84E-07 | 2 |
| Arhgap9  | 0.36320514  | 0.483 | 0.36  | 4.14E-07 | 2 |
| Cetn2    | 0.343593244 | 0.379 | 0.251 | 4.35E-07 | 2 |
| Kcnab2   | 0.330922242 | 0.264 | 0.137 | 4.39E-07 | 2 |
| Ndufb11  | 0.311530925 | 0.707 | 0.661 | 4.62E-07 | 2 |
| Lsm4     | 0.293458435 | 0.638 | 0.555 | 4.77E-07 | 2 |
| Cdc37    | 0.303494227 | 0.672 | 0.617 | 5.32E-07 | 2 |
| Tprgl    | 0.312987599 | 0.615 | 0.524 | 5.42E-07 | 2 |
| Nedd9    | 0.350682525 | 0.282 | 0.147 | 5.71E-07 | 2 |
| Syf2     | 0.306393721 | 0.609 | 0.528 | 6.13E-07 | 2 |
| Polr1d   | 0.27680059  | 0.764 | 0.685 | 6.67E-07 | 2 |
| Spcs2    | 0.315550608 | 0.747 | 0.653 | 6.78E-07 | 2 |
| Dennd4a  | 0.391134687 | 0.506 | 0.385 | 6.90E-07 | 2 |
| Rnf166   | 0.364868747 | 0.368 | 0.237 | 7.56E-07 | 2 |
| Sap18    | 0.261055924 | 0.563 | 0.468 | 1.03E-06 | 2 |
| Tes      | 0.273771465 | 0.351 | 0.214 | 1.10E-06 | 2 |
| Ddx21    | 0.365321901 | 0.374 | 0.248 | 1.11E-06 | 2 |
| Hectd1   | 0.388230528 | 0.385 | 0.257 | 1.11E-06 | 2 |
| Rnaset2b | 0.407567212 | 0.477 | 0.38  | 1.19E-06 | 2 |
| Nmi      | 0.329413298 | 0.374 | 0.245 | 1.21E-06 | 2 |
| Anxa11   | 0.259614628 | 0.448 | 0.327 | 1.28E-06 | 2 |
| Akap13   | 0.423458609 | 0.546 | 0.463 | 1.34E-06 | 2 |
| Tpst2    | 0.391554845 | 0.494 | 0.394 | 1.38E-06 | 2 |
| Rcan2    | 0.390034557 | 0.356 | 0.231 | 1.55E-06 | 2 |
| Ube2i    | 0.304986013 | 0.638 | 0.551 | 1.58E-06 | 2 |
| Anp32a   | 0.266483664 | 0.701 | 0.661 | 1.77E-06 | 2 |
| Srsf3    | 0.269602136 | 0.695 | 0.622 | 1.92E-06 | 2 |
| Sec11a   | 0.266952309 | 0.609 | 0.548 | 1.97E-06 | 2 |
| Pdpf     | 0.322711861 | 0.431 | 0.304 | 2.02E-06 | 2 |
| Cox7a2l  | 0.261235215 | 0.885 | 0.794 | 2.57E-06 | 2 |
| Rsl1d1   | 0.305083553 | 0.414 | 0.306 | 2.91E-06 | 2 |
| Ramp1    | 0.762259251 | 0.408 | 0.306 | 3.15E-06 | 2 |
| Puf60    | 0.311816245 | 0.523 | 0.441 | 3.37E-06 | 2 |
| Irf2bpl  | 0.333037782 | 0.264 | 0.145 | 3.50E-06 | 2 |
| H2afv    | 0.347070327 | 0.534 | 0.443 | 4.02E-06 | 2 |
| Churc1   | 0.317874018 | 0.5   | 0.409 | 4.53E-06 | 2 |
| Lgals1   | 0.400163642 | 0.908 | 0.881 | 4.70E-06 | 2 |
| Srsf2    | 0.295514081 | 0.667 | 0.605 | 4.87E-06 | 2 |
| Capn1    | 0.364098906 | 0.276 | 0.163 | 4.94E-06 | 2 |
| Sipa1    | 0.264331938 | 0.471 | 0.371 | 5.27E-06 | 2 |
| Prr13    | 0.29424339  | 0.753 | 0.698 | 5.69E-06 | 2 |
| Smc4     | 0.403408959 | 0.345 | 0.222 | 5.70E-06 | 2 |
| Malt1    | 0.33057843  | 0.276 | 0.155 | 6.27E-06 | 2 |
| Cd47     | 0.265444809 | 0.764 | 0.713 | 6.30E-06 | 2 |
| Ptbp1    | 0.30657674  | 0.385 | 0.275 | 6.55E-06 | 2 |
| Ikzf1    | 0.330331256 | 0.368 | 0.246 | 6.87E-06 | 2 |
| Sae1     | 0.275979678 | 0.397 | 0.289 | 8.71E-06 | 2 |
| Zdhhc20  | 0.34081386  | 0.333 | 0.218 | 8.89E-06 | 2 |
| Cnot6l   | 0.274043964 | 0.287 | 0.172 | 8.90E-06 | 2 |
| Supt4a   | 0.282975358 | 0.655 | 0.621 | 8.91E-06 | 2 |
| Cellf2   | 0.315764245 | 0.603 | 0.533 | 1.01E-05 | 2 |

|          |             |       |       |            |   |
|----------|-------------|-------|-------|------------|---|
| Dock2    | 0.452077469 | 0.397 | 0.315 | 1.07E-05   | 2 |
| Efr3a    | 0.273549104 | 0.339 | 0.221 | 1.08E-05   | 2 |
| Sfpq     | 0.37524409  | 0.546 | 0.469 | 1.16E-05   | 2 |
| Polr2m   | 0.29167621  | 0.379 | 0.278 | 1.22E-05   | 2 |
| E2f4     | 0.337932007 | 0.374 | 0.267 | 1.27E-05   | 2 |
| Tap2     | 0.434436282 | 0.397 | 0.3   | 1.34E-05   | 2 |
| Chic2    | 0.300721989 | 0.517 | 0.447 | 1.40E-05   | 2 |
| Set      | 0.304440074 | 0.632 | 0.584 | 1.46E-05   | 2 |
| Ddx24    | 0.320076315 | 0.529 | 0.445 | 1.48E-05   | 2 |
| Zfand6   | 0.270154149 | 0.517 | 0.444 | 1.54E-05   | 2 |
| Ttc14    | 0.322084984 | 0.345 | 0.231 | 1.80E-05   | 2 |
| Nasp     | 0.300215979 | 0.264 | 0.153 | 1.84E-05   | 2 |
| Rtf1     | 0.272870037 | 0.437 | 0.341 | 1.94E-05   | 2 |
| Senp6    | 0.28403853  | 0.305 | 0.192 | 2.06E-05   | 2 |
| Arid5a   | 0.436163252 | 0.368 | 0.26  | 2.09E-05   | 2 |
| Scamp3   | 0.314247164 | 0.397 | 0.294 | 2.29E-05   | 2 |
| Cytip    | 0.253058061 | 0.523 | 0.375 | 2.35E-05   | 2 |
| Ssrp1    | 0.28641983  | 0.42  | 0.323 | 2.35E-05   | 2 |
| Tpr      | 0.31470709  | 0.557 | 0.488 | 2.40E-05   | 2 |
| Odc1     | 0.801503239 | 0.328 | 0.227 | 2.43E-05   | 2 |
| Ctbp1    | 0.250313129 | 0.54  | 0.483 | 2.44E-05   | 2 |
| Tubb4b   | 0.34663178  | 0.408 | 0.308 | 2.47E-05   | 2 |
| Sf3b3    | 0.277354081 | 0.333 | 0.225 | 2.56E-05   | 2 |
| Ewsr1    | 0.311577423 | 0.54  | 0.466 | 2.58E-05   | 2 |
| Ifi27    | 0.271548123 | 0.552 | 0.451 | 2.58E-05   | 2 |
| Arpc5l   | 0.308306346 | 0.483 | 0.398 | 2.88E-05   | 2 |
| Rcc2     | 0.394165745 | 0.282 | 0.176 | 2.89E-05   | 2 |
| Med30    | 0.31679632  | 0.345 | 0.241 | 3.13E-05   | 2 |
| Lsm6     | 0.272034807 | 0.506 | 0.425 | 3.48E-05   | 2 |
| Ran      | 0.260573042 | 0.724 | 0.661 | 3.51E-05   | 2 |
| Hnrnp1   | 0.374761307 | 0.414 | 0.318 | 3.83E-05   | 2 |
| Rassf5   | 0.275421148 | 0.374 | 0.275 | 3.95E-05   | 2 |
| Peli1    | 0.303112311 | 0.356 | 0.253 | 4.03E-05   | 2 |
| Lrp10    | 0.423607769 | 0.454 | 0.365 | 4.16E-05   | 2 |
| Rbbp4    | 0.2970342   | 0.425 | 0.336 | 4.64E-05   | 2 |
| Khdrbs1  | 0.265163676 | 0.506 | 0.424 | 5.12E-05   | 2 |
| Rbbp6    | 0.330744826 | 0.368 | 0.276 | 6.08E-05   | 2 |
| N4bp2l2  | 0.353214471 | 0.31  | 0.215 | 6.49E-05   | 2 |
| Tap1     | 0.32683851  | 0.379 | 0.281 | 6.57E-05   | 2 |
| Tsc22d4  | 0.295459161 | 0.506 | 0.449 | 7.01E-05   | 2 |
| Snrnp40  | 0.34161776  | 0.339 | 0.245 | 7.11E-05   | 2 |
| Pdcd6    | 0.260398144 | 0.58  | 0.545 | 7.65E-05   | 2 |
| Prex1    | 0.275331619 | 0.339 | 0.24  | 8.75E-05   | 2 |
| Magoh    | 0.250637092 | 0.454 | 0.37  | 9.44E-05   | 2 |
| Smchd1   | 0.316804617 | 0.322 | 0.227 | 9.95E-05   | 2 |
| Ptk2b    | 0.274994854 | 0.368 | 0.268 | 0.00010472 | 2 |
| Nudt21   | 0.332883742 | 0.448 | 0.393 | 0.00010516 | 2 |
| Bex3     | 0.307093561 | 0.316 | 0.22  | 0.00010574 | 2 |
| Mknk2    | 0.328119603 | 0.379 | 0.293 | 0.00011046 | 2 |
| Nr4a2    | 0.293258813 | 0.253 | 0.151 | 0.00012035 | 2 |
| Prkacb   | 0.323241447 | 0.287 | 0.192 | 0.0001207  | 2 |
| Dap      | 0.362676162 | 0.477 | 0.42  | 0.00012558 | 2 |
| Nop56    | 0.29081183  | 0.322 | 0.231 | 0.00013406 | 2 |
| Cdc42se1 | 0.273260022 | 0.425 | 0.357 | 0.000136   | 2 |
| Ppp2r5a  | 0.275720321 | 0.305 | 0.212 | 0.00014045 | 2 |
| Idnk     | 0.261935314 | 0.374 | 0.285 | 0.00014277 | 2 |
| Fip1l1   | 0.287546266 | 0.305 | 0.215 | 0.00015715 | 2 |
| Hivep2   | 0.386082988 | 0.27  | 0.179 | 0.00015755 | 2 |
| Ubac2    | 0.301102271 | 0.356 | 0.27  | 0.00017844 | 2 |
| Lrch4    | 0.269331337 | 0.287 | 0.194 | 0.00018961 | 2 |
| Ifi203   | 0.286763413 | 0.42  | 0.325 | 0.00019156 | 2 |
| Krit1    | 0.305988838 | 0.293 | 0.2   | 0.00019619 | 2 |
| Sema4a   | 0.269492974 | 0.374 | 0.276 | 0.0001998  | 2 |
| Ndfip1   | 0.278617527 | 0.368 | 0.283 | 0.00020056 | 2 |
| Wac      | 0.315484302 | 0.379 | 0.297 | 0.00022974 | 2 |
| Dusp11   | 0.317310031 | 0.42  | 0.347 | 0.00025354 | 2 |
| Sugt1    | 0.2741197   | 0.431 | 0.358 | 0.00025656 | 2 |
| Pstpip1  | 0.252924656 | 0.391 | 0.305 | 0.00027121 | 2 |
| Larp7    | 0.251831832 | 0.264 | 0.173 | 0.00030103 | 2 |
| Phf20l1  | 0.292779182 | 0.293 | 0.205 | 0.00032233 | 2 |
| Rfc2     | 0.288321809 | 0.351 | 0.27  | 0.00033378 | 2 |
| Rsbnl1   | 0.288970447 | 0.305 | 0.215 | 0.00036181 | 2 |
| Usp3     | 0.29392418  | 0.305 | 0.217 | 0.00036644 | 2 |
| Mrpl4    | 0.288511682 | 0.414 | 0.361 | 0.00039285 | 2 |
| Ankrd12  | 0.267700109 | 0.339 | 0.257 | 0.0004728  | 2 |
| Lta4h    | 0.257472258 | 0.282 | 0.194 | 0.00052222 | 2 |
| Tnrc6b   | 0.284909784 | 0.276 | 0.19  | 0.00053497 | 2 |

|         |             |       |       |            |   |
|---------|-------------|-------|-------|------------|---|
| Rgs2    | 0.44552878  | 0.638 | 0.571 | 0.00054728 | 2 |
| Ddx50   | 0.272594396 | 0.362 | 0.293 | 0.00056887 | 2 |
| Arf6    | 0.250849612 | 0.546 | 0.52  | 0.00057619 | 2 |
| Smc6    | 0.263870759 | 0.397 | 0.325 | 0.0005839  | 2 |
| Sec11c  | 0.300566457 | 0.632 | 0.62  | 0.00068468 | 2 |
| Uhrf2   | 0.468513049 | 0.305 | 0.226 | 0.00073227 | 2 |
| Me2     | 0.25695081  | 0.259 | 0.179 | 0.00096478 | 2 |
| Ptprn2  | 0.260139996 | 0.253 | 0.176 | 0.00098152 | 2 |
| Tram1   | 0.272113536 | 0.552 | 0.527 | 0.00101141 | 2 |
| Srsf7   | 0.268843159 | 0.489 | 0.447 | 0.00101443 | 2 |
| H2-T23  | 0.315682471 | 0.408 | 0.34  | 0.0011559  | 2 |
| Eif4b   | 0.275271532 | 0.425 | 0.369 | 0.00119335 | 2 |
| Fubp1   | 0.278381819 | 0.333 | 0.258 | 0.00120123 | 2 |
| Mndal   | 0.259853045 | 0.443 | 0.369 | 0.00120181 | 2 |
| Rnf167  | 0.267910133 | 0.264 | 0.182 | 0.00126093 | 2 |
| Tsn     | 0.255377419 | 0.471 | 0.418 | 0.00131627 | 2 |
| Selenoh | 0.36115028  | 0.379 | 0.321 | 0.00140881 | 2 |
| Immp1l  | 0.255688504 | 0.328 | 0.259 | 0.00142494 | 2 |
| Lsm8    | 0.291856027 | 0.356 | 0.299 | 0.0015109  | 2 |
| Prpsap1 | 0.262115054 | 0.305 | 0.235 | 0.00159782 | 2 |
| Ilf2    | 0.256057665 | 0.282 | 0.204 | 0.00173673 | 2 |
| Rexo2   | 0.275857627 | 0.523 | 0.497 | 0.00178404 | 2 |
| Nelffb  | 0.256084553 | 0.282 | 0.215 | 0.00210282 | 2 |
| Slbp    | 0.337990054 | 0.351 | 0.296 | 0.00211552 | 2 |
| Vrk3    | 0.275069771 | 0.264 | 0.199 | 0.00254075 | 2 |
| Tob2    | 0.338575383 | 0.339 | 0.275 | 0.00254975 | 2 |
| Prkag1  | 0.260628998 | 0.305 | 0.241 | 0.00265387 | 2 |
| Hpf1    | 0.290821921 | 0.333 | 0.274 | 0.00265449 | 2 |
| Rp9     | 0.258373752 | 0.425 | 0.385 | 0.00283068 | 2 |
| Cd164   | 0.260927001 | 0.333 | 0.271 | 0.00286802 | 2 |
| Frmf8   | 0.29908587  | 0.264 | 0.201 | 0.00289836 | 2 |
| Cast    | 0.288945272 | 0.339 | 0.286 | 0.00343741 | 2 |
| Slc3a2  | 0.263286053 | 0.724 | 0.665 | 0.00380734 | 2 |
| Bclaf1  | 0.259932842 | 0.368 | 0.319 | 0.00426597 | 2 |
| Pik3cd  | 0.288663557 | 0.282 | 0.219 | 0.00453996 | 2 |
| Fgl2    | 0.28316671  | 0.356 | 0.29  | 0.00483505 | 2 |
| Pfcp    | 0.328015435 | 0.356 | 0.296 | 0.00489216 | 2 |
| Mycbp2  | 0.302842168 | 0.333 | 0.285 | 0.00530172 | 2 |
| Cbfb    | 0.262799732 | 0.339 | 0.301 | 0.0081992  | 2 |
| Arid1a  | 0.258461156 | 0.287 | 0.237 | 0.0089221  | 2 |
| H2-DMb2 | 1.709629991 | 0.722 | 0.018 | 2.46E-163  | 3 |
| H2-Oa   | 1.056483043 | 0.469 | 0.013 | 1.55E-99   | 3 |
| Cd209a  | 2.257741127 | 0.463 | 0.019 | 3.72E-91   | 3 |
| H2-Eb1  | 1.602873209 | 1     | 0.371 | 4.29E-74   | 3 |
| H2-Aa   | 1.606800978 | 1     | 0.388 | 1.37E-73   | 3 |
| Napsa   | 1.387545143 | 0.796 | 0.18  | 2.22E-73   | 3 |
| H2-Ab1  | 1.617238467 | 1     | 0.472 | 2.44E-70   | 3 |
| Siglecg | 0.60541353  | 0.327 | 0.008 | 1.05E-69   | 3 |
| H2-Ob   | 0.761194892 | 0.401 | 0.024 | 2.90E-68   | 3 |
| Ciita   | 0.674002448 | 0.519 | 0.059 | 1.53E-65   | 3 |
| H2-DMa  | 1.268796741 | 0.969 | 0.46  | 1.13E-63   | 3 |
| Cd74    | 1.391573894 | 1     | 0.669 | 1.26E-60   | 3 |
| H2-DMb1 | 1.317582767 | 0.864 | 0.344 | 1.77E-56   | 3 |
| Fit3    | 0.412120017 | 0.327 | 0.019 | 8.89E-55   | 3 |
| Cbfa2t3 | 0.628832408 | 0.525 | 0.085 | 9.78E-52   | 3 |
| Map4k1  | 0.547844493 | 0.475 | 0.067 | 5.46E-51   | 3 |
| Dpp4    | 0.354036965 | 0.315 | 0.02  | 7.68E-51   | 3 |
| Olfm1   | 0.566226836 | 0.525 | 0.101 | 9.30E-44   | 3 |
| Kmo     | 0.355999314 | 0.321 | 0.031 | 2.41E-42   | 3 |
| Plbd1   | 0.94120646  | 0.747 | 0.269 | 5.13E-41   | 3 |
| Rnase6  | 0.663578818 | 0.494 | 0.101 | 1.26E-39   | 3 |
| Gm2a    | 0.971961742 | 0.895 | 0.56  | 4.86E-39   | 3 |
| Ryr1    | 0.336559405 | 0.272 | 0.025 | 1.25E-36   | 3 |
| Bri3bp  | 0.414388026 | 0.444 | 0.083 | 1.99E-36   | 3 |
| Spint1  | 0.312787029 | 0.278 | 0.029 | 2.99E-35   | 3 |
| Klrd1   | 0.531087885 | 0.42  | 0.073 | 3.06E-34   | 3 |
| Clec4b1 | 0.829814226 | 0.438 | 0.099 | 9.73E-33   | 3 |
| Syng2   | 1.088800558 | 0.796 | 0.494 | 2.00E-31   | 3 |
| Cytip   | 0.58045485  | 0.796 | 0.336 | 2.20E-31   | 3 |
| Lsp1    | 0.763504691 | 0.957 | 0.687 | 3.37E-31   | 3 |
| Wdfy4   | 0.502614312 | 0.377 | 0.074 | 1.61E-30   | 3 |
| Rpl41   | 0.354606727 | 1     | 0.994 | 4.92E-28   | 3 |
| Tnfr3   | 0.720145771 | 0.438 | 0.113 | 8.33E-28   | 3 |
| Rpsa    | 0.488657037 | 0.994 | 0.892 | 9.16E-28   | 3 |
| Rpl35   | 0.468452057 | 0.994 | 0.92  | 3.31E-27   | 3 |
| Grk3    | 0.299813992 | 0.321 | 0.058 | 7.70E-27   | 3 |
| Rps19   | 0.434731923 | 1     | 0.951 | 2.46E-26   | 3 |



|         |             |       |       |          |   |
|---------|-------------|-------|-------|----------|---|
| Gpr171  | 0.497713257 | 0.463 | 0.124 | 3.05E-26 | 3 |
| Pmaip1  | 0.634971603 | 0.58  | 0.2   | 3.67E-26 | 3 |
| Tmsb10  | 0.407482505 | 0.994 | 0.744 | 1.01E-25 | 3 |
| Slamf8  | 0.300811224 | 0.352 | 0.076 | 5.34E-25 | 3 |
| Rpl13   | 0.387580428 | 1     | 0.971 | 8.24E-25 | 3 |
| Csf2rb  | 0.514673321 | 0.556 | 0.198 | 2.41E-24 | 3 |
| Rps6    | 0.381763873 | 0.988 | 0.952 | 5.23E-24 | 3 |
| Avp1    | 0.450441198 | 0.438 | 0.122 | 6.49E-24 | 3 |
| Ear2    | 1.191674297 | 0.309 | 0.063 | 8.06E-24 | 3 |
| Pkib    | 0.394433851 | 0.506 | 0.162 | 1.09E-23 | 3 |
| Agpat4  | 0.375797    | 0.574 | 0.193 | 1.15E-23 | 3 |
| Fgr     | 0.342688122 | 0.481 | 0.141 | 1.64E-23 | 3 |
| Bhlhe40 | 0.658388338 | 0.605 | 0.236 | 2.47E-23 | 3 |
| Ccdc88a | 0.4597288   | 0.531 | 0.179 | 3.95E-23 | 3 |
| Itgb7   | 0.385406982 | 0.525 | 0.165 | 4.25E-23 | 3 |
| Alcam   | 0.322489455 | 0.525 | 0.172 | 9.39E-23 | 3 |
| Rogdi   | 0.753383173 | 0.463 | 0.146 | 1.08E-22 | 3 |
| St3gal5 | 0.300215099 | 0.321 | 0.072 | 5.22E-22 | 3 |
| Crip1   | 0.931818255 | 0.951 | 0.887 | 2.47E-21 | 3 |
| Ppm1m   | 0.455645459 | 0.457 | 0.155 | 4.10E-21 | 3 |
| Rps28   | 0.355061694 | 0.994 | 0.958 | 4.28E-21 | 3 |
| Rps8    | 0.330569334 | 1     | 0.95  | 6.68E-21 | 3 |
| Sub1    | 0.445201327 | 0.944 | 0.84  | 8.75E-21 | 3 |
| Prp     | 0.443345216 | 0.821 | 0.424 | 1.07E-20 | 3 |
| Rps27a  | 0.305474179 | 1     | 0.967 | 1.41E-20 | 3 |
| Batf3   | 0.603076069 | 0.389 | 0.121 | 1.86E-20 | 3 |
| Cd52    | 0.485937877 | 0.988 | 0.868 | 2.66E-20 | 3 |
| S100a11 | 0.282513819 | 0.914 | 0.783 | 2.85E-20 | 3 |
| Rps26   | 0.384344256 | 0.994 | 0.923 | 4.62E-20 | 3 |
| Plxnd1  | 0.506827801 | 0.315 | 0.079 | 6.09E-20 | 3 |
| Tap1    | 0.447906621 | 0.611 | 0.248 | 7.48E-20 | 3 |
| Rps7    | 0.394294799 | 0.994 | 0.936 | 7.59E-20 | 3 |
| S100a4  | 0.673833747 | 0.809 | 0.539 | 9.59E-20 | 3 |
| Mcemp1  | 0.260018569 | 0.34  | 0.085 | 1.49E-19 | 3 |
| Itgax   | 0.357647066 | 0.451 | 0.147 | 3.38E-19 | 3 |
| Rplp0   | 0.342345723 | 1     | 0.963 | 3.39E-19 | 3 |
| Ms4a4c  | 0.564133595 | 0.475 | 0.17  | 3.86E-19 | 3 |
| Bcl2a1d | 0.691693326 | 0.679 | 0.339 | 1.43E-18 | 3 |
| Ifitm6  | 0.41705633  | 0.438 | 0.145 | 1.66E-18 | 3 |
| Gpr132  | 0.326659859 | 0.568 | 0.221 | 1.71E-18 | 3 |
| Rps18   | 0.329850936 | 0.994 | 0.945 | 2.11E-18 | 3 |
| Etv3    | 0.485204133 | 0.463 | 0.163 | 2.30E-18 | 3 |
| Rpl28   | 0.344004375 | 0.994 | 0.908 | 2.87E-18 | 3 |
| Rras2   | 0.308878061 | 0.272 | 0.062 | 3.12E-18 | 3 |
| Ccnd1   | 0.442121337 | 0.451 | 0.155 | 4.44E-18 | 3 |
| Slamf7  | 0.34733842  | 0.432 | 0.146 | 1.09E-17 | 3 |
| Vars    | 0.374339003 | 0.444 | 0.151 | 1.40E-17 | 3 |
| Rpl39   | 0.319634911 | 1     | 0.944 | 3.10E-17 | 3 |
| Gm11808 | 0.440386097 | 0.957 | 0.712 | 1.34E-16 | 3 |
| Traf1   | 0.526792334 | 0.432 | 0.165 | 1.84E-16 | 3 |
| Rpl15   | 0.315000212 | 0.994 | 0.924 | 2.33E-16 | 3 |
| Cnn2    | 0.460987472 | 0.827 | 0.516 | 3.64E-16 | 3 |
| Rps16   | 0.286441254 | 1     | 0.968 | 4.32E-16 | 3 |
| Pira2   | 0.25227033  | 0.389 | 0.129 | 4.43E-16 | 3 |
| Rpl36a  | 0.362092243 | 0.994 | 0.888 | 5.38E-16 | 3 |
| Bloc1s2 | 0.296061687 | 0.611 | 0.271 | 8.49E-16 | 3 |
| Ahr     | 0.254242603 | 0.296 | 0.081 | 1.02E-15 | 3 |
| Malt1   | 0.285471551 | 0.401 | 0.138 | 1.16E-15 | 3 |
| H2afz   | 0.663424146 | 0.92  | 0.84  | 1.17E-15 | 3 |
| Rps9    | 0.284322474 | 1     | 0.982 | 1.52E-15 | 3 |
| Fgfr1   | 0.253672523 | 0.34  | 0.103 | 1.90E-15 | 3 |
| Rps15a  | 0.29930034  | 0.994 | 0.946 | 3.23E-15 | 3 |
| Pgls    | 0.326276083 | 0.821 | 0.518 | 4.80E-15 | 3 |
| Rps24   | 0.309629437 | 0.994 | 0.948 | 4.89E-15 | 3 |
| Eef1g   | 0.418308827 | 0.944 | 0.811 | 7.27E-15 | 3 |
| Rps3a1  | 0.297512336 | 1     | 0.947 | 1.05E-14 | 3 |
| H2afy   | 0.541514646 | 0.747 | 0.562 | 1.05E-14 | 3 |
| St3gal4 | 0.320786666 | 0.463 | 0.182 | 1.19E-14 | 3 |
| Ass1    | 0.380317825 | 0.444 | 0.173 | 1.30E-14 | 3 |
| Rpl14   | 0.260185343 | 0.988 | 0.945 | 1.35E-14 | 3 |
| Rpl35a  | 0.277515831 | 0.994 | 0.965 | 2.16E-14 | 3 |
| Rps5    | 0.313666524 | 0.994 | 0.952 | 2.28E-14 | 3 |
| Slc35c2 | 0.306780177 | 0.506 | 0.212 | 3.39E-14 | 3 |
| Rel     | 0.499113895 | 0.531 | 0.257 | 3.52E-14 | 3 |
| Atox1   | 0.494100537 | 0.889 | 0.829 | 5.22E-14 | 3 |
| Ifitm1  | 0.342035347 | 0.253 | 0.066 | 5.72E-14 | 3 |
| Mrps6   | 0.255861832 | 0.34  | 0.111 | 5.92E-14 | 3 |

|               |             |       |       |          |   |
|---------------|-------------|-------|-------|----------|---|
| Rps4x         | 0.2680106   | 0.994 | 0.931 | 6.33E-14 | 3 |
| Lsr           | 0.279497488 | 0.333 | 0.112 | 6.33E-14 | 3 |
| Nr4a1         | 0.332763351 | 0.716 | 0.392 | 6.88E-14 | 3 |
| Sept9         | 0.330383672 | 0.543 | 0.252 | 1.08E-13 | 3 |
| Naaa          | 0.669727503 | 0.562 | 0.301 | 1.49E-13 | 3 |
| Psemb8        | 0.463440041 | 0.864 | 0.732 | 1.95E-13 | 3 |
| Gm10076       | 0.34618592  | 0.617 | 0.302 | 2.05E-13 | 3 |
| Nr4a2         | 0.302191821 | 0.377 | 0.134 | 2.99E-13 | 3 |
| Rpl4          | 0.294017861 | 0.988 | 0.921 | 3.85E-13 | 3 |
| Unc119        | 0.364134521 | 0.481 | 0.223 | 4.60E-13 | 3 |
| Pip4k2a       | 0.282585075 | 0.537 | 0.238 | 4.62E-13 | 3 |
| Rps27         | 0.391161823 | 1     | 0.986 | 4.88E-13 | 3 |
| Myo1g         | 0.401972802 | 0.506 | 0.239 | 5.13E-13 | 3 |
| Rps10         | 0.278644937 | 0.988 | 0.908 | 5.75E-13 | 3 |
| Nfkb2         | 0.273438293 | 0.414 | 0.163 | 5.81E-13 | 3 |
| Rpl21         | 0.267550977 | 0.994 | 0.953 | 7.24E-13 | 3 |
| H2-T23        | 0.259058802 | 0.636 | 0.308 | 9.27E-13 | 3 |
| Psemb9        | 0.373478399 | 0.691 | 0.401 | 9.33E-13 | 3 |
| Lrrk1         | 0.264318877 | 0.333 | 0.115 | 1.15E-12 | 3 |
| Rpl8          | 0.26731168  | 1     | 0.935 | 1.18E-12 | 3 |
| Nap11         | 0.313415554 | 0.778 | 0.465 | 1.18E-12 | 3 |
| Actg1         | 0.335204955 | 0.981 | 0.971 | 1.42E-12 | 3 |
| 5031439G07Rik | 0.309497707 | 0.475 | 0.209 | 1.48E-12 | 3 |
| Rps15         | 0.301410198 | 0.994 | 0.94  | 1.60E-12 | 3 |
| Pde4b         | 0.269400793 | 0.562 | 0.266 | 1.69E-12 | 3 |
| Ccr2          | 0.435055038 | 0.599 | 0.301 | 1.96E-12 | 3 |
| Rps11         | 0.298532394 | 0.994 | 0.949 | 2.46E-12 | 3 |
| Snrpg         | 0.282805513 | 0.926 | 0.692 | 3.03E-12 | 3 |
| Rpl27-ps3     | 0.288053467 | 0.778 | 0.44  | 4.00E-12 | 3 |
| Rpl36al       | 0.296219792 | 0.938 | 0.765 | 5.89E-12 | 3 |
| Tctex1d2      | 0.336925589 | 0.457 | 0.202 | 6.26E-12 | 3 |
| Rpl27         | 0.280529115 | 0.981 | 0.885 | 6.56E-12 | 3 |
| Fbl           | 0.307356882 | 0.71  | 0.412 | 8.04E-12 | 3 |
| Rpl17         | 0.288526028 | 0.994 | 0.962 | 8.77E-12 | 3 |
| Sec61b        | 0.341676304 | 0.926 | 0.785 | 1.01E-11 | 3 |
| Rpl32         | 0.262659302 | 0.994 | 0.955 | 1.06E-11 | 3 |
| Naga          | 0.388924406 | 0.377 | 0.159 | 1.25E-11 | 3 |
| Dbnl          | 0.362245315 | 0.685 | 0.421 | 1.44E-11 | 3 |
| Tuba1a        | 0.304931719 | 0.741 | 0.467 | 1.67E-11 | 3 |
| Rack1         | 0.266125274 | 0.981 | 0.838 | 3.10E-11 | 3 |
| Baz1a         | 0.305740936 | 0.58  | 0.304 | 4.32E-11 | 3 |
| Skap2         | 0.266839882 | 0.753 | 0.475 | 4.61E-11 | 3 |
| Grb2          | 0.374421265 | 0.747 | 0.509 | 5.38E-11 | 3 |
| Tmem123       | 0.787003994 | 0.63  | 0.354 | 5.90E-11 | 3 |
| Eef1b2        | 0.296318532 | 0.938 | 0.774 | 6.18E-11 | 3 |
| Qpct          | 0.283941013 | 0.278 | 0.101 | 6.20E-11 | 3 |
| Rpl34         | 0.250954489 | 0.994 | 0.957 | 6.64E-11 | 3 |
| Rps20         | 0.326696248 | 0.994 | 0.911 | 7.62E-11 | 3 |
| Eif3k         | 0.250484422 | 0.932 | 0.765 | 1.02E-10 | 3 |
| Pdpdf         | 0.257892088 | 0.568 | 0.285 | 1.09E-10 | 3 |
| Clec10a       | 0.557819032 | 0.395 | 0.182 | 1.19E-10 | 3 |
| Uba52         | 0.353969437 | 0.858 | 0.599 | 1.21E-10 | 3 |
| Hspe1         | 0.268034546 | 0.87  | 0.671 | 1.36E-10 | 3 |
| Set           | 0.291473262 | 0.802 | 0.559 | 2.38E-10 | 3 |
| Map3k14       | 0.272726581 | 0.278 | 0.096 | 2.44E-10 | 3 |
| Dock10        | 0.300236678 | 0.525 | 0.273 | 2.78E-10 | 3 |
| Rpl13a        | 0.265333606 | 0.957 | 0.811 | 4.31E-10 | 3 |
| Snrpf         | 0.271237831 | 0.852 | 0.613 | 4.60E-10 | 3 |
| Slc25a20      | 0.264789854 | 0.346 | 0.147 | 6.71E-10 | 3 |
| Psm7          | 0.29406362  | 0.877 | 0.707 | 8.82E-10 | 3 |
| Zyx           | 0.290269958 | 0.728 | 0.484 | 1.32E-09 | 3 |
| Ndufa6        | 0.269024538 | 0.907 | 0.742 | 1.61E-09 | 3 |
| Glpr2         | 0.251693388 | 0.358 | 0.15  | 1.86E-09 | 3 |
| Nhp2          | 0.275393973 | 0.636 | 0.371 | 1.94E-09 | 3 |
| Rps21         | 0.253254933 | 0.988 | 0.9   | 2.23E-09 | 3 |
| Mrpl52        | 0.260572758 | 0.852 | 0.648 | 2.81E-09 | 3 |
| Sri           | 0.2601534   | 0.84  | 0.642 | 4.87E-09 | 3 |
| Samhd1        | 0.275181954 | 0.778 | 0.502 | 4.89E-09 | 3 |
| Fh1           | 0.277844962 | 0.5   | 0.262 | 5.78E-09 | 3 |
| Smdt1         | 0.356845523 | 0.852 | 0.707 | 7.88E-09 | 3 |
| Sec61g        | 0.257244234 | 0.932 | 0.826 | 1.27E-08 | 3 |
| Fam96a        | 0.250944072 | 0.722 | 0.483 | 1.64E-08 | 3 |
| Ranbp1        | 0.295475537 | 0.784 | 0.571 | 2.22E-08 | 3 |
| Anxa2         | 0.396175186 | 0.809 | 0.666 | 3.83E-08 | 3 |
| Serp1         | 0.270356764 | 0.87  | 0.641 | 4.03E-08 | 3 |
| Uqcc2         | 0.268137463 | 0.728 | 0.475 | 5.19E-08 | 3 |
| Cfp           | 0.431431596 | 0.71  | 0.513 | 5.62E-08 | 3 |

|           |             |       |       |            |   |
|-----------|-------------|-------|-------|------------|---|
| Erp29     | 0.264187142 | 0.87  | 0.647 | 7.84E-08   | 3 |
| Fosb      | 0.252464689 | 0.667 | 0.419 | 9.29E-08   | 3 |
| Cd83      | 0.295904253 | 0.722 | 0.46  | 1.08E-07   | 3 |
| Actb      | 0.322450525 | 1     | 0.982 | 1.14E-07   | 3 |
| Nfkb1     | 0.274570695 | 0.549 | 0.329 | 1.89E-07   | 3 |
| Mif4gd    | 0.35566051  | 0.475 | 0.29  | 1.11E-06   | 3 |
| Relb      | 0.514187609 | 0.352 | 0.193 | 3.86E-06   | 3 |
| Rps27l    | 0.28692513  | 0.864 | 0.754 | 4.61E-06   | 3 |
| Pitpna    | 0.25014261  | 0.846 | 0.719 | 6.92E-06   | 3 |
| Ptp4a3    | 0.34486071  | 0.315 | 0.165 | 8.31E-06   | 3 |
| Rps27rt   | 0.251032834 | 0.87  | 0.666 | 2.19E-05   | 3 |
| Herpud1   | 0.272349785 | 0.568 | 0.387 | 2.52E-05   | 3 |
| Psme2     | 0.266595069 | 0.79  | 0.633 | 5.43E-05   | 3 |
| Mcub      | 0.314711648 | 0.586 | 0.44  | 8.40E-05   | 3 |
| Tagln2    | 0.282750492 | 0.809 | 0.744 | 0.00235228 | 3 |
| Fn1       | 0.939658013 | 0.352 | 0.265 | 0.00333692 | 3 |
| F10       | 1.693287739 | 0.735 | 0.031 | 2.04E-146  | 4 |
| Chil3     | 2.881132039 | 0.629 | 0.021 | 6.40E-131  | 4 |
| Gsr       | 1.266323717 | 0.887 | 0.215 | 6.26E-79   | 4 |
| Nr1h3     | 0.659398746 | 0.477 | 0.038 | 2.51E-70   | 4 |
| Sirpb1c   | 0.997610738 | 0.649 | 0.105 | 4.50E-65   | 4 |
| Cd300a    | 1.101860233 | 0.907 | 0.348 | 2.48E-58   | 4 |
| Trem4     | 0.675081303 | 0.305 | 0.012 | 2.86E-58   | 4 |
| Thbs1     | 0.931244771 | 0.543 | 0.077 | 7.97E-57   | 4 |
| Tgm2      | 0.843503933 | 0.675 | 0.139 | 5.64E-56   | 4 |
| Ly6c2     | 1.206858872 | 0.543 | 0.076 | 6.73E-56   | 4 |
| Lgals3    | 1.399476623 | 1     | 0.655 | 2.19E-54   | 4 |
| Gngt2     | 1.405057594 | 0.907 | 0.385 | 3.99E-54   | 4 |
| Plac8     | 2.580864109 | 0.649 | 0.154 | 7.01E-54   | 4 |
| Cyp4f18   | 1.007225757 | 0.748 | 0.2   | 8.22E-53   | 4 |
| Psap      | 1.372312547 | 0.993 | 0.859 | 1.16E-52   | 4 |
| Hp        | 0.938930581 | 0.477 | 0.063 | 1.93E-50   | 4 |
| Lst1      | 0.99650055  | 0.954 | 0.481 | 1.84E-49   | 4 |
| Soat1     | 0.629303358 | 0.669 | 0.157 | 3.37E-49   | 4 |
| Msrb1     | 0.915385948 | 0.974 | 0.5   | 4.56E-49   | 4 |
| Napsa     | 0.875890376 | 0.762 | 0.191 | 3.41E-48   | 4 |
| Tnfsf13os | 0.413087284 | 0.311 | 0.022 | 1.40E-47   | 4 |
| Ly6i      | 0.74539341  | 0.258 | 0.012 | 6.95E-47   | 4 |
| Gm21188   | 0.68283499  | 0.669 | 0.16  | 7.53E-46   | 4 |
| Klra2     | 0.611341699 | 0.371 | 0.041 | 4.64E-45   | 4 |
| Mpeg1     | 0.9910443   | 0.927 | 0.431 | 1.14E-44   | 4 |
| Plaur     | 0.556156012 | 0.841 | 0.273 | 4.03E-44   | 4 |
| Fgr       | 0.634017292 | 0.589 | 0.13  | 1.88E-43   | 4 |
| Ms4a4c    | 1.134940208 | 0.623 | 0.153 | 2.34E-43   | 4 |
| Slc7a11   | 0.347750898 | 0.543 | 0.097 | 1.08E-41   | 4 |
| Tmem51    | 0.675487784 | 0.603 | 0.148 | 1.39E-41   | 4 |
| Cyba      | 0.657733904 | 1     | 0.925 | 1.64E-41   | 4 |
| Clec4e    | 0.83293841  | 0.636 | 0.155 | 7.98E-41   | 4 |
| Fam20c    | 0.575036978 | 0.397 | 0.058 | 1.76E-40   | 4 |
| Igsf6     | 0.710151227 | 0.801 | 0.297 | 1.78E-40   | 4 |
| Abi3      | 0.629033359 | 0.702 | 0.213 | 1.56E-38   | 4 |
| Gpmb      | 1.214527809 | 0.384 | 0.058 | 2.08E-38   | 4 |
| Hck       | 0.741443988 | 0.834 | 0.331 | 2.38E-38   | 4 |
| Rab20     | 0.68868959  | 0.742 | 0.258 | 3.95E-38   | 4 |
| Rab32     | 0.60429693  | 0.576 | 0.149 | 7.68E-38   | 4 |
| Slpi      | 0.317446614 | 0.371 | 0.047 | 9.22E-38   | 4 |
| Hpse      | 0.365268834 | 0.325 | 0.038 | 1.76E-37   | 4 |
| Abcg1     | 0.629567349 | 0.715 | 0.23  | 5.96E-37   | 4 |
| Ctsz      | 0.865173862 | 0.98  | 0.729 | 1.52E-36   | 4 |
| Sat1      | 0.982438409 | 0.987 | 0.768 | 1.71E-36   | 4 |
| Fabp5     | 1.598814892 | 0.616 | 0.182 | 1.87E-36   | 4 |
| Plin2     | 0.923420078 | 0.947 | 0.622 | 4.86E-36   | 4 |
| Gm5150    | 0.418545759 | 0.338 | 0.045 | 5.79E-36   | 4 |
| Ctss      | 0.827617338 | 0.98  | 0.781 | 1.03E-35   | 4 |
| Gsto1     | 0.596705065 | 0.762 | 0.271 | 1.46E-35   | 4 |
| Trem3     | 0.383207643 | 0.285 | 0.028 | 1.87E-35   | 4 |
| Arl5c     | 0.4709588   | 0.55  | 0.131 | 4.29E-35   | 4 |
| B2m       | 0.572804615 | 1     | 0.971 | 7.33E-35   | 4 |
| Adssl1    | 0.605752652 | 0.636 | 0.194 | 1.13E-34   | 4 |
| Ear2      | 0.600896337 | 0.371 | 0.057 | 2.01E-34   | 4 |
| Cstb      | 1.243861689 | 0.954 | 0.708 | 2.09E-33   | 4 |
| Pla2g7    | 0.827882459 | 0.901 | 0.425 | 3.16E-32   | 4 |
| Gla       | 0.378294007 | 0.424 | 0.085 | 3.35E-32   | 4 |
| Tnfai2    | 0.345000929 | 0.596 | 0.167 | 3.43E-31   | 4 |
| Emilin2   | 0.539246799 | 0.682 | 0.247 | 5.18E-31   | 4 |
| Taldo1    | 0.645407804 | 0.967 | 0.713 | 1.21E-30   | 4 |
| Acp5      | 1.135701154 | 0.609 | 0.215 | 1.66E-30   | 4 |

|          |             |       |       |          |   |
|----------|-------------|-------|-------|----------|---|
| Cd93     | 0.645345036 | 0.55  | 0.159 | 1.86E-30 | 4 |
| Tmem38b  | 0.397332498 | 0.397 | 0.077 | 2.59E-30 | 4 |
| Eif4a1   | 0.640406688 | 0.98  | 0.825 | 3.27E-30 | 4 |
| Cd68     | 0.801486074 | 0.947 | 0.639 | 5.19E-30 | 4 |
| Osm      | 0.919337423 | 0.656 | 0.232 | 8.62E-30 | 4 |
| Tyrobp   | 0.474212369 | 1     | 0.805 | 9.55E-30 | 4 |
| Slc11a1  | 0.644326439 | 0.735 | 0.282 | 1.16E-29 | 4 |
| Cebpb    | 0.772574816 | 0.987 | 0.731 | 1.43E-29 | 4 |
| Ace      | 0.537246436 | 0.331 | 0.056 | 1.57E-29 | 4 |
| Lamp1    | 0.63202552  | 0.993 | 0.777 | 3.59E-29 | 4 |
| Clec4a3  | 0.768414126 | 0.841 | 0.403 | 6.69E-29 | 4 |
| Sirpb1b  | 0.268481263 | 0.391 | 0.076 | 7.72E-29 | 4 |
| Mgst1    | 0.7766686   | 0.503 | 0.141 | 4.61E-28 | 4 |
| Fuca2    | 0.480765919 | 0.669 | 0.245 | 7.85E-28 | 4 |
| Pglyrp1  | 0.976860517 | 0.45  | 0.11  | 2.09E-27 | 4 |
| Mfsd1    | 0.569268463 | 0.748 | 0.331 | 3.33E-27 | 4 |
| Gm2a     | 0.639013492 | 0.921 | 0.56  | 5.48E-27 | 4 |
| Fam26f   | 0.442010446 | 0.311 | 0.053 | 6.79E-27 | 4 |
| Gpr137b  | 0.582883152 | 0.675 | 0.26  | 7.18E-27 | 4 |
| Plbd1    | 0.517753869 | 0.735 | 0.275 | 8.26E-27 | 4 |
| Smpdl3a  | 0.915921619 | 0.808 | 0.416 | 1.31E-26 | 4 |
| Gm14005  | 0.33646588  | 0.325 | 0.06  | 1.37E-26 | 4 |
| Rnh1     | 0.963109093 | 0.848 | 0.525 | 2.37E-26 | 4 |
| Sgk1     | 0.885946555 | 0.689 | 0.287 | 2.65E-26 | 4 |
| Litaf    | 0.553662661 | 0.921 | 0.581 | 6.58E-26 | 4 |
| Gdf15    | 1.052071909 | 0.358 | 0.08  | 6.80E-26 | 4 |
| Cd300c2  | 0.532574156 | 0.927 | 0.471 | 1.05E-25 | 4 |
| Mmp14    | 0.449511793 | 0.371 | 0.083 | 1.31E-25 | 4 |
| Oas1a    | 0.517743813 | 0.603 | 0.226 | 2.84E-25 | 4 |
| Atp6v1c1 | 0.586260632 | 0.715 | 0.329 | 3.11E-25 | 4 |
| Fcer1g   | 0.456933744 | 1     | 0.808 | 3.98E-25 | 4 |
| Atp6v1b2 | 0.514356658 | 0.788 | 0.388 | 8.61E-25 | 4 |
| Tgfb1    | 0.667304337 | 0.907 | 0.609 | 9.64E-25 | 4 |
| Cib1     | 0.38833534  | 0.722 | 0.291 | 1.14E-24 | 4 |
| Nfe2l2   | 0.538322447 | 0.861 | 0.472 | 1.16E-24 | 4 |
| Ctsb     | 0.973841124 | 0.993 | 0.827 | 1.23E-24 | 4 |
| Sirpa    | 0.512570366 | 0.834 | 0.458 | 3.36E-24 | 4 |
| Sdcbp    | 0.622274715 | 0.967 | 0.779 | 3.81E-24 | 4 |
| Npc2     | 0.509327024 | 0.987 | 0.857 | 3.81E-24 | 4 |
| Adgre5   | 0.517551783 | 0.728 | 0.308 | 4.42E-24 | 4 |
| Rnf149   | 0.497189534 | 0.768 | 0.368 | 5.54E-24 | 4 |
| Mcemp1   | 0.331715473 | 0.371 | 0.083 | 7.35E-24 | 4 |
| Rap1a    | 0.589679108 | 0.934 | 0.654 | 2.54E-23 | 4 |
| Clec4n   | 0.85957723  | 0.722 | 0.325 | 3.03E-23 | 4 |
| Lyn      | 0.523765941 | 0.848 | 0.473 | 3.32E-23 | 4 |
| Nceh1    | 0.538456255 | 0.457 | 0.137 | 4.74E-23 | 4 |
| Gpr141   | 0.376094952 | 0.265 | 0.047 | 4.76E-23 | 4 |
| Rilpl2   | 0.717632828 | 0.649 | 0.284 | 1.00E-22 | 4 |
| Pilrb1   | 0.383868341 | 0.364 | 0.088 | 1.36E-22 | 4 |
| Ifi211   | 0.501050152 | 0.47  | 0.144 | 2.03E-22 | 4 |
| Prdx5    | 0.787663463 | 0.954 | 0.715 | 2.05E-22 | 4 |
| Ms4a6c   | 0.658427402 | 0.921 | 0.53  | 2.05E-22 | 4 |
| Sod2     | 0.842572048 | 0.801 | 0.437 | 6.73E-22 | 4 |
| Ifitm3   | 0.787111874 | 0.98  | 0.704 | 7.68E-22 | 4 |
| Fam49a   | 0.408396186 | 0.404 | 0.112 | 8.02E-22 | 4 |
| Slc25a5  | 0.469382284 | 0.987 | 0.809 | 9.22E-22 | 4 |
| Zeb2os   | 0.367345275 | 0.583 | 0.214 | 1.06E-21 | 4 |
| Adgre4   | 0.443348342 | 0.252 | 0.045 | 1.21E-21 | 4 |
| Cd44     | 0.356789291 | 0.821 | 0.418 | 1.28E-21 | 4 |
| Slc15a3  | 0.344130502 | 0.689 | 0.278 | 1.44E-21 | 4 |
| Msr1     | 0.615415561 | 0.57  | 0.22  | 1.84E-21 | 4 |
| Clec4d   | 0.311394486 | 0.57  | 0.203 | 2.59E-21 | 4 |
| Coro1b   | 0.41668771  | 0.901 | 0.51  | 6.60E-21 | 4 |
| Bri3     | 0.588039275 | 0.954 | 0.68  | 8.67E-21 | 4 |
| Slc16a10 | 0.309626359 | 0.404 | 0.113 | 9.15E-21 | 4 |
| H3f3a    | 0.407879455 | 0.993 | 0.934 | 1.04E-20 | 4 |
| Tpd52    | 0.4392845   | 0.921 | 0.576 | 1.40E-20 | 4 |
| Bax      | 0.533876815 | 0.921 | 0.611 | 2.47E-20 | 4 |
| Il1rn    | 0.854478097 | 0.464 | 0.155 | 2.89E-20 | 4 |
| Tmem14c  | 0.473418275 | 0.881 | 0.574 | 5.27E-20 | 4 |
| Nadk     | 0.491342487 | 0.715 | 0.337 | 8.52E-20 | 4 |
| Itgb2    | 0.525022962 | 0.921 | 0.595 | 9.36E-20 | 4 |
| Gpr35    | 0.302227206 | 0.344 | 0.09  | 1.29E-19 | 4 |
| Tkt      | 0.416050542 | 0.907 | 0.503 | 1.43E-19 | 4 |
| Lgals8   | 0.285888433 | 0.51  | 0.175 | 1.85E-19 | 4 |
| Hes1     | 0.574840754 | 0.331 | 0.085 | 2.19E-19 | 4 |
| Tcirg1   | 0.462602367 | 0.596 | 0.266 | 2.61E-19 | 4 |

|               |             |       |       |          |   |
|---------------|-------------|-------|-------|----------|---|
| ltgal         | 0.450561658 | 0.404 | 0.117 | 3.34E-19 | 4 |
| Ptp4a1        | 0.411827785 | 0.775 | 0.409 | 3.40E-19 | 4 |
| Tmem65        | 0.377028627 | 0.43  | 0.138 | 3.72E-19 | 4 |
| Acp2          | 0.39180909  | 0.457 | 0.159 | 4.17E-19 | 4 |
| Gsap          | 0.281060814 | 0.351 | 0.096 | 5.94E-19 | 4 |
| Ftl1          | 0.551898705 | 1     | 0.996 | 6.18E-19 | 4 |
| Ifi204        | 0.396992979 | 0.656 | 0.287 | 7.50E-19 | 4 |
| Atp6v0d1      | 0.44767626  | 0.848 | 0.489 | 7.69E-19 | 4 |
| Cd48          | 0.669145011 | 0.874 | 0.606 | 8.44E-19 | 4 |
| Aprt          | 0.539372528 | 0.808 | 0.478 | 9.65E-19 | 4 |
| Vps26a        | 0.385188249 | 0.636 | 0.286 | 9.69E-19 | 4 |
| Csf2rb        | 0.304329245 | 0.543 | 0.203 | 2.16E-18 | 4 |
| Slamf8        | 0.471160148 | 0.318 | 0.083 | 2.76E-18 | 4 |
| Pgam1         | 0.504695705 | 0.781 | 0.469 | 3.03E-18 | 4 |
| Apobec1       | 0.324269803 | 0.682 | 0.3   | 3.59E-18 | 4 |
| Cybb          | 0.603294645 | 0.861 | 0.516 | 3.91E-18 | 4 |
| Prdx1         | 0.663760497 | 0.967 | 0.824 | 3.96E-18 | 4 |
| Tifab         | 0.342131538 | 0.437 | 0.144 | 4.03E-18 | 4 |
| Ass1          | 0.594707557 | 0.477 | 0.171 | 4.54E-18 | 4 |
| Haus8         | 0.290644799 | 0.43  | 0.141 | 5.94E-18 | 4 |
| Tmem86a       | 0.402053173 | 0.576 | 0.234 | 8.11E-18 | 4 |
| Pparg         | 0.295860504 | 0.285 | 0.069 | 8.21E-18 | 4 |
| Skap2         | 0.380687279 | 0.861 | 0.463 | 1.07E-17 | 4 |
| Atp6v1d       | 0.369794079 | 0.735 | 0.378 | 1.18E-17 | 4 |
| Zeb2          | 0.457812918 | 0.854 | 0.464 | 1.41E-17 | 4 |
| Lyz2          | 0.609117261 | 0.993 | 0.744 | 1.43E-17 | 4 |
| Ctsd          | 0.810033112 | 0.954 | 0.826 | 1.49E-17 | 4 |
| Sem1          | 0.362003619 | 0.993 | 0.869 | 1.78E-17 | 4 |
| Frrs1         | 0.270390302 | 0.384 | 0.118 | 1.97E-17 | 4 |
| Mrpl52        | 0.453312736 | 0.94  | 0.638 | 2.22E-17 | 4 |
| 2310022A10Rik | 0.29971328  | 0.411 | 0.136 | 2.49E-17 | 4 |
| Ly9           | 0.374294762 | 0.411 | 0.134 | 3.85E-17 | 4 |
| Ugp2          | 0.356633425 | 0.623 | 0.274 | 4.02E-17 | 4 |
| Ifitm6        | 0.874204167 | 0.417 | 0.15  | 4.10E-17 | 4 |
| Tnfrsf1b      | 0.432509544 | 0.57  | 0.238 | 4.53E-17 | 4 |
| Spi1          | 0.414303682 | 0.98  | 0.644 | 5.11E-17 | 4 |
| Prkd          | 0.488699648 | 0.801 | 0.464 | 6.12E-17 | 4 |
| Renbp         | 0.436112008 | 0.523 | 0.224 | 6.40E-17 | 4 |
| Mpp1          | 0.414492964 | 0.662 | 0.324 | 6.41E-17 | 4 |
| Sec61g        | 0.418470355 | 0.974 | 0.822 | 6.86E-17 | 4 |
| Irf7          | 0.414852032 | 0.576 | 0.235 | 7.07E-17 | 4 |
| Rasgef1b      | 0.420554839 | 0.53  | 0.215 | 7.77E-17 | 4 |
| Uap11         | 0.51633222  | 0.576 | 0.285 | 9.89E-17 | 4 |
| Lgmn          | 0.642379913 | 0.907 | 0.656 | 1.18E-16 | 4 |
| Lrp1          | 0.321829345 | 0.695 | 0.341 | 1.20E-16 | 4 |
| Ncf2          | 0.425426352 | 0.834 | 0.49  | 1.58E-16 | 4 |
| Myo1f         | 0.355961092 | 0.722 | 0.362 | 1.72E-16 | 4 |
| Scarb1        | 0.259495862 | 0.331 | 0.097 | 2.15E-16 | 4 |
| Alas1         | 0.268594941 | 0.464 | 0.171 | 3.06E-16 | 4 |
| Ube2a         | 0.325476819 | 0.735 | 0.406 | 3.17E-16 | 4 |
| Aph1c         | 0.363303583 | 0.43  | 0.157 | 3.78E-16 | 4 |
| Plgkrt        | 0.436512907 | 0.603 | 0.286 | 4.12E-16 | 4 |
| Hnrnpa3       | 0.435777771 | 0.927 | 0.674 | 4.16E-16 | 4 |
| Camk2d        | 0.341469142 | 0.523 | 0.211 | 4.33E-16 | 4 |
| Dusp3         | 0.340404193 | 0.616 | 0.281 | 5.63E-16 | 4 |
| Cycs          | 0.426830566 | 0.848 | 0.536 | 1.11E-15 | 4 |
| Eno1          | 0.543832117 | 0.927 | 0.681 | 1.14E-15 | 4 |
| Capza2        | 0.384068268 | 0.98  | 0.738 | 1.22E-15 | 4 |
| Ptpn1         | 0.459853969 | 0.854 | 0.504 | 1.34E-15 | 4 |
| Plekhf2       | 0.335813174 | 0.503 | 0.21  | 1.56E-15 | 4 |
| Esd           | 0.463339767 | 0.868 | 0.551 | 1.69E-15 | 4 |
| Cln3          | 0.273731342 | 0.483 | 0.189 | 2.07E-15 | 4 |
| Cd244         | 0.253765687 | 0.258 | 0.065 | 3.02E-15 | 4 |
| Nfil3         | 0.335863184 | 0.563 | 0.247 | 3.30E-15 | 4 |
| Tgfb1         | 0.652483687 | 0.894 | 0.622 | 3.41E-15 | 4 |
| Creg1         | 0.551956446 | 0.841 | 0.532 | 3.89E-15 | 4 |
| Pdxk          | 0.316302035 | 0.384 | 0.133 | 4.15E-15 | 4 |
| Stard5        | 0.251506326 | 0.371 | 0.121 | 4.68E-15 | 4 |
| Mdfic         | 0.353269953 | 0.53  | 0.24  | 5.38E-15 | 4 |
| Ak2           | 0.346025159 | 0.563 | 0.264 | 6.33E-15 | 4 |
| Atp6v1a       | 0.395372128 | 0.603 | 0.292 | 7.27E-15 | 4 |
| Gabarap       | 0.319746479 | 0.98  | 0.89  | 9.23E-15 | 4 |
| Atp1a1        | 0.348563118 | 0.887 | 0.571 | 1.07E-14 | 4 |
| Lilr4b        | 0.405947153 | 0.755 | 0.479 | 1.12E-14 | 4 |
| Plek          | 0.318075452 | 0.834 | 0.506 | 1.24E-14 | 4 |
| Pilra         | 0.407393101 | 0.543 | 0.236 | 1.30E-14 | 4 |
| Hnrnp2        | 0.273805878 | 0.695 | 0.348 | 1.32E-14 | 4 |

|          |             |       |       |          |   |
|----------|-------------|-------|-------|----------|---|
| Cmpk1    | 0.305757856 | 0.848 | 0.538 | 1.34E-14 | 4 |
| Mtpn     | 0.347109094 | 0.715 | 0.375 | 1.45E-14 | 4 |
| Cisd2    | 0.33472455  | 0.695 | 0.366 | 1.59E-14 | 4 |
| Por      | 0.308894521 | 0.497 | 0.207 | 1.72E-14 | 4 |
| AB124611 | 0.464074318 | 0.755 | 0.444 | 1.73E-14 | 4 |
| Havcr2   | 0.286454399 | 0.311 | 0.096 | 2.69E-14 | 4 |
| Pilrb2   | 0.308608811 | 0.384 | 0.138 | 2.75E-14 | 4 |
| Ifngr2   | 0.312215792 | 0.768 | 0.419 | 2.82E-14 | 4 |
| Itgax    | 0.345050401 | 0.411 | 0.156 | 3.20E-14 | 4 |
| Fcgr4    | 0.437764015 | 0.536 | 0.24  | 3.27E-14 | 4 |
| Fyb      | 0.384829854 | 0.854 | 0.556 | 3.49E-14 | 4 |
| Rhoa     | 0.307285497 | 0.98  | 0.8   | 3.60E-14 | 4 |
| Msn      | 0.349763763 | 0.974 | 0.722 | 4.06E-14 | 4 |
| Calm1    | 0.34688985  | 1     | 0.901 | 4.15E-14 | 4 |
| C3       | 0.330438619 | 0.47  | 0.195 | 4.24E-14 | 4 |
| Fam105a  | 0.445093697 | 0.775 | 0.49  | 4.42E-14 | 4 |
| Ptpn6    | 0.353436365 | 0.874 | 0.588 | 5.02E-14 | 4 |
| Nampt    | 0.25887981  | 0.543 | 0.237 | 5.03E-14 | 4 |
| Cndp2    | 0.457596953 | 0.742 | 0.459 | 5.78E-14 | 4 |
| Lrrc25   | 0.324283593 | 0.861 | 0.516 | 5.89E-14 | 4 |
| M6pr     | 0.369982857 | 0.821 | 0.545 | 5.90E-14 | 4 |
| Mafb     | 0.454132805 | 0.755 | 0.424 | 5.92E-14 | 4 |
| Fabp4    | 0.723903967 | 0.258 | 0.072 | 8.10E-14 | 4 |
| Tep1     | 0.390283601 | 0.523 | 0.241 | 8.46E-14 | 4 |
| Csf2ra   | 0.353741397 | 0.854 | 0.467 | 9.49E-14 | 4 |
| Atp6v1e1 | 0.278904432 | 0.854 | 0.547 | 1.03E-13 | 4 |
| Rap2a    | 0.275813531 | 0.397 | 0.151 | 1.23E-13 | 4 |
| Rbpms    | 0.28924957  | 0.364 | 0.129 | 1.28E-13 | 4 |
| Gm6377   | 0.498447639 | 0.556 | 0.272 | 1.32E-13 | 4 |
| Anxa5    | 0.418100186 | 0.954 | 0.746 | 1.37E-13 | 4 |
| Tlr2     | 0.430068741 | 0.715 | 0.381 | 1.49E-13 | 4 |
| Lamtor5  | 0.264141662 | 0.848 | 0.547 | 1.55E-13 | 4 |
| Amdhd2   | 0.294651804 | 0.49  | 0.217 | 2.35E-13 | 4 |
| P2rx4    | 0.38767816  | 0.728 | 0.414 | 2.39E-13 | 4 |
| Fam129b  | 0.252407643 | 0.397 | 0.154 | 4.76E-13 | 4 |
| Rpl36a1  | 0.343873644 | 0.974 | 0.762 | 5.00E-13 | 4 |
| Samhd1   | 0.509251736 | 0.788 | 0.503 | 6.29E-13 | 4 |
| Ubl3     | 0.371942844 | 0.834 | 0.543 | 7.38E-13 | 4 |
| Atox1    | 0.274645605 | 0.987 | 0.817 | 8.10E-13 | 4 |
| Arf1     | 0.302056575 | 0.954 | 0.76  | 9.56E-13 | 4 |
| Usmg5    | 0.264711354 | 0.947 | 0.69  | 9.60E-13 | 4 |
| Idh1     | 0.317374404 | 0.457 | 0.2   | 1.01E-12 | 4 |
| Abrac1   | 0.347574477 | 0.907 | 0.63  | 1.07E-12 | 4 |
| Fth1     | 0.488177915 | 1     | 0.998 | 1.23E-12 | 4 |
| Rab1a    | 0.329938176 | 0.795 | 0.504 | 1.58E-12 | 4 |
| Capzb    | 0.300741379 | 0.967 | 0.834 | 1.67E-12 | 4 |
| Hif1a    | 0.263206915 | 0.49  | 0.219 | 1.73E-12 | 4 |
| Gnpda1   | 0.291812119 | 0.51  | 0.237 | 2.62E-12 | 4 |
| Neu1     | 0.255858186 | 0.57  | 0.265 | 2.68E-12 | 4 |
| Ap1s2    | 0.432068567 | 0.656 | 0.35  | 2.99E-12 | 4 |
| Irf5     | 0.369045095 | 0.788 | 0.511 | 3.07E-12 | 4 |
| Tmsb10   | 0.320144364 | 0.974 | 0.749 | 3.41E-12 | 4 |
| Sgp1     | 0.26382999  | 0.536 | 0.255 | 3.41E-12 | 4 |
| Evl      | 0.282176814 | 0.682 | 0.345 | 3.60E-12 | 4 |
| Cacybp   | 0.274501162 | 0.722 | 0.399 | 3.86E-12 | 4 |
| Glud1    | 0.307668348 | 0.854 | 0.524 | 3.91E-12 | 4 |
| Sf3b6    | 0.300575609 | 0.868 | 0.537 | 3.94E-12 | 4 |
| Pkm      | 0.450359579 | 0.974 | 0.789 | 4.05E-12 | 4 |
| Ccr12    | 0.395972005 | 0.709 | 0.409 | 4.25E-12 | 4 |
| Vapa     | 0.282683714 | 0.874 | 0.593 | 5.07E-12 | 4 |
| Clec4a1  | 0.36302138  | 0.689 | 0.367 | 5.85E-12 | 4 |
| Tmem208  | 0.254547568 | 0.702 | 0.369 | 6.07E-12 | 4 |
| Noct     | 0.255351282 | 0.291 | 0.099 | 6.10E-12 | 4 |
| Cd84     | 0.335989671 | 0.629 | 0.336 | 6.26E-12 | 4 |
| Atp6v0e  | 0.264070293 | 0.974 | 0.812 | 6.57E-12 | 4 |
| Fam96a   | 0.266380341 | 0.788 | 0.476 | 7.00E-12 | 4 |
| Got1     | 0.292582645 | 0.517 | 0.249 | 7.35E-12 | 4 |
| Irak2    | 0.283343    | 0.338 | 0.122 | 8.99E-12 | 4 |
| Cyp4f16  | 0.267429383 | 0.318 | 0.112 | 9.30E-12 | 4 |
| Dtnbp1   | 0.333032618 | 0.596 | 0.322 | 1.05E-11 | 4 |
| Anxa4    | 0.340087404 | 0.603 | 0.315 | 1.15E-11 | 4 |
| Lipa     | 0.466376461 | 0.623 | 0.354 | 1.29E-11 | 4 |
| B4gal15  | 0.281456557 | 0.437 | 0.191 | 1.39E-11 | 4 |
| Il17ra   | 0.285705876 | 0.364 | 0.141 | 1.40E-11 | 4 |
| Arpc5    | 0.279645583 | 0.987 | 0.807 | 1.72E-11 | 4 |
| Cct8     | 0.286827472 | 0.788 | 0.487 | 2.10E-11 | 4 |
| Pcbp1    | 0.284397114 | 0.894 | 0.63  | 2.41E-11 | 4 |

|          |             |       |       |          |   |
|----------|-------------|-------|-------|----------|---|
| Ptafr    | 0.39840482  | 0.636 | 0.348 | 2.66E-11 | 4 |
| BC028528 | 0.266774863 | 0.649 | 0.33  | 2.78E-11 | 4 |
| Bin2     | 0.314313309 | 0.702 | 0.395 | 3.50E-11 | 4 |
| Atp6v1g1 | 0.346630565 | 0.927 | 0.782 | 3.71E-11 | 4 |
| Aldh3b1  | 0.276289848 | 0.47  | 0.214 | 4.03E-11 | 4 |
| lfrd1    | 0.409227766 | 0.735 | 0.469 | 4.27E-11 | 4 |
| Kras     | 0.288682036 | 0.55  | 0.272 | 5.01E-11 | 4 |
| Ncf4     | 0.351888358 | 0.715 | 0.431 | 5.14E-11 | 4 |
| Malt1    | 0.301131408 | 0.364 | 0.146 | 7.40E-11 | 4 |
| ltga4    | 0.36693747  | 0.417 | 0.191 | 1.05E-10 | 4 |
| Ms4a6d   | 0.440049036 | 0.828 | 0.534 | 1.06E-10 | 4 |
| Psm2     | 0.279449586 | 0.901 | 0.672 | 1.29E-10 | 4 |
| Ppp4c    | 0.254960661 | 0.854 | 0.568 | 1.54E-10 | 4 |
| Vamp4    | 0.276063639 | 0.55  | 0.289 | 1.62E-10 | 4 |
| Cd53     | 0.300799152 | 0.974 | 0.798 | 1.62E-10 | 4 |
| Gch1     | 0.253697771 | 0.523 | 0.256 | 1.73E-10 | 4 |
| Dnase2a  | 0.301857538 | 0.576 | 0.313 | 1.79E-10 | 4 |
| Gyg      | 0.306168241 | 0.47  | 0.224 | 1.83E-10 | 4 |
| Atp6v0b  | 0.3278093   | 0.974 | 0.736 | 2.02E-10 | 4 |
| Vps29    | 0.298596546 | 0.801 | 0.533 | 2.18E-10 | 4 |
| Gpx1     | 0.356599512 | 0.98  | 0.843 | 2.35E-10 | 4 |
| Ctsa     | 0.2856339   | 0.954 | 0.67  | 2.37E-10 | 4 |
| Ifi209   | 0.326806093 | 0.404 | 0.183 | 3.31E-10 | 4 |
| Naa20    | 0.294201019 | 0.543 | 0.284 | 3.73E-10 | 4 |
| Gapdh    | 0.277791765 | 0.987 | 0.849 | 4.11E-10 | 4 |
| Ccr2     | 0.396526495 | 0.583 | 0.306 | 4.17E-10 | 4 |
| Chmp4b   | 0.262432356 | 0.921 | 0.653 | 5.05E-10 | 4 |
| Gstm1    | 0.74882476  | 0.536 | 0.298 | 5.40E-10 | 4 |
| Psm2     | 0.315604011 | 0.901 | 0.62  | 5.57E-10 | 4 |
| Atp6ap1  | 0.275213292 | 0.834 | 0.566 | 5.75E-10 | 4 |
| Pirb     | 0.251005912 | 0.728 | 0.428 | 6.11E-10 | 4 |
| Pdia6    | 0.434782189 | 0.821 | 0.616 | 6.36E-10 | 4 |
| Lat2     | 0.402057469 | 0.629 | 0.377 | 7.53E-10 | 4 |
| Cytip    | 0.301289751 | 0.656 | 0.36  | 9.50E-10 | 4 |
| Rgl1     | 0.272745115 | 0.344 | 0.144 | 1.59E-09 | 4 |
| Trappc1  | 0.258423496 | 0.589 | 0.331 | 1.91E-09 | 4 |
| Dnajb11  | 0.252012128 | 0.715 | 0.461 | 2.03E-09 | 4 |
| Psm3     | 0.258141266 | 0.914 | 0.655 | 2.76E-09 | 4 |
| Selenos  | 0.270412143 | 0.781 | 0.476 | 2.99E-09 | 4 |
| Tmem258  | 0.252829829 | 0.934 | 0.662 | 3.01E-09 | 4 |
| Akr1a1   | 0.389622341 | 0.934 | 0.789 | 3.83E-09 | 4 |
| Psm6     | 0.380329262 | 0.868 | 0.673 | 4.04E-09 | 4 |
| Psm7     | 0.264409229 | 0.927 | 0.702 | 4.23E-09 | 4 |
| lqgap1   | 0.280808533 | 0.848 | 0.585 | 8.22E-09 | 4 |
| Fn1      | 0.262187798 | 0.483 | 0.248 | 1.45E-08 | 4 |
| Pgk1     | 0.285484864 | 0.728 | 0.464 | 1.46E-08 | 4 |
| Tpp1     | 0.278655432 | 0.589 | 0.355 | 1.48E-08 | 4 |
| Fam49b   | 0.280122763 | 0.921 | 0.707 | 1.49E-08 | 4 |
| Efh2     | 0.286175131 | 0.934 | 0.666 | 1.54E-08 | 4 |
| Tgif1    | 0.255433147 | 0.662 | 0.39  | 1.54E-08 | 4 |
| Pitpna   | 0.280056698 | 0.94  | 0.708 | 1.61E-08 | 4 |
| Psm8     | 0.265807646 | 0.828 | 0.593 | 2.18E-08 | 4 |
| Fcgr1    | 0.340952316 | 0.656 | 0.391 | 2.19E-08 | 4 |
| Hexa     | 0.29917495  | 0.954 | 0.691 | 2.81E-08 | 4 |
| Lpxn     | 0.273932223 | 0.596 | 0.35  | 4.08E-08 | 4 |
| Vat1     | 0.404710755 | 0.464 | 0.26  | 4.12E-08 | 4 |
| Hmox1    | 0.32026801  | 0.589 | 0.346 | 5.19E-08 | 4 |
| Bcl2a1d  | 0.32494222  | 0.609 | 0.352 | 5.29E-08 | 4 |
| Bcl2a1a  | 0.254804555 | 0.437 | 0.226 | 5.62E-08 | 4 |
| Spg21    | 0.251145178 | 0.702 | 0.471 | 6.02E-08 | 4 |
| Pycard   | 0.288284462 | 0.841 | 0.568 | 8.20E-08 | 4 |
| Grn      | 0.294524447 | 0.934 | 0.666 | 8.75E-08 | 4 |
| Rap1b    | 0.289340905 | 0.947 | 0.78  | 9.43E-08 | 4 |
| S100a4   | 0.281586907 | 0.808 | 0.541 | 1.07E-07 | 4 |
| Nr4a1    | 0.315617343 | 0.662 | 0.402 | 1.37E-07 | 4 |
| Lgals3bp | 0.37195616  | 0.623 | 0.418 | 1.78E-07 | 4 |
| Cot1     | 0.254428074 | 0.967 | 0.851 | 2.17E-07 | 4 |
| Capg     | 0.286807201 | 0.801 | 0.551 | 2.25E-07 | 4 |
| St13     | 0.26177676  | 0.742 | 0.512 | 2.77E-07 | 4 |
| Hspa8    | 0.275735493 | 1     | 0.953 | 3.29E-07 | 4 |
| Aif1     | 0.28217015  | 0.728 | 0.496 | 3.88E-07 | 4 |
| Vim      | 0.51727098  | 0.947 | 0.813 | 4.58E-07 | 4 |
| Ctsh     | 0.255320629 | 0.934 | 0.675 | 5.72E-07 | 4 |
| Tgfbr1   | 0.250580997 | 0.424 | 0.235 | 6.12E-07 | 4 |
| Hspa5    | 0.300584465 | 0.947 | 0.774 | 1.63E-06 | 4 |
| Anxa2    | 0.330534034 | 0.828 | 0.665 | 2.05E-06 | 4 |
| Rgs1     | 0.527854546 | 0.675 | 0.495 | 5.29E-06 | 4 |

|               |             |       |       |            |   |
|---------------|-------------|-------|-------|------------|---|
| Hebp1         | 0.360903571 | 0.278 | 0.136 | 5.66E-06   | 4 |
| Ier3          | 0.280220758 | 0.636 | 0.442 | 1.69E-05   | 4 |
| Sdf2l1        | 0.254975785 | 0.702 | 0.524 | 3.62E-05   | 4 |
| Calr          | 0.276305033 | 0.874 | 0.765 | 5.38E-05   | 4 |
| Aldoa         | 0.251267877 | 0.907 | 0.762 | 6.80E-05   | 4 |
| Mgp           | 1.579870946 | 0.915 | 0.972 | 2.24E-31   | 5 |
| Fth1          | 0.625592686 | 1     | 0.998 | 3.81E-12   | 5 |
| Acta2         | 1.27875791  | 0.708 | 0.735 | 1.31E-11   | 5 |
| Igfbp7        | 1.408270021 | 0.708 | 0.809 | 4.23E-11   | 5 |
| Serf2         | 0.475257287 | 0.887 | 0.976 | 6.05E-10   | 5 |
| Ftl1          | 0.823096647 | 0.991 | 0.997 | 1.54E-09   | 5 |
| Rplp1         | 0.338119653 | 0.925 | 0.971 | 1.81E-08   | 5 |
| Ppia          | 0.448723913 | 0.868 | 0.968 | 2.37E-08   | 5 |
| Dcn           | 1.520172264 | 0.557 | 0.471 | 2.39E-08   | 5 |
| Sparc         | 1.205981572 | 0.594 | 0.604 | 7.43E-08   | 5 |
| 1810058124Rik | 0.279248127 | 0.198 | 0.585 | 4.46E-07   | 5 |
| Sin3b         | 0.285297422 | 0.189 | 0.545 | 4.74E-07   | 5 |
| Cst3          | 0.332380975 | 0.981 | 0.943 | 5.31E-07   | 5 |
| Mpc1          | 0.321965322 | 0.217 | 0.591 | 9.72E-07   | 5 |
| Lamtor5       | 0.271057875 | 0.226 | 0.615 | 1.24E-06   | 5 |
| Myl6          | 0.410726012 | 0.887 | 0.983 | 1.40E-06   | 5 |
| Mt1           | 0.598231629 | 0.783 | 0.833 | 1.82E-06   | 5 |
| Strap         | 0.260305929 | 0.132 | 0.423 | 1.97E-06   | 5 |
| Pgls          | 0.367229857 | 0.226 | 0.586 | 3.22E-06   | 5 |
| Spp1          | 1.74631368  | 0.462 | 0.334 | 3.45E-06   | 5 |
| 1110004F10Rik | 0.261634814 | 0.151 | 0.459 | 4.32E-06   | 5 |
| Rps17         | 0.368815152 | 0.83  | 0.945 | 4.45E-06   | 5 |
| Creg1         | 0.270174471 | 0.236 | 0.598 | 4.50E-06   | 5 |
| Trappc4       | 0.293397408 | 0.17  | 0.481 | 6.58E-06   | 5 |
| Pdcd5         | 0.330669303 | 0.208 | 0.553 | 6.67E-06   | 5 |
| Nars          | 0.452481341 | 0.17  | 0.497 | 6.96E-06   | 5 |
| Tmem219       | 0.413937125 | 0.132 | 0.416 | 7.55E-06   | 5 |
| Akr1b3        | 0.271454322 | 0.217 | 0.562 | 8.10E-06   | 5 |
| Ddost         | 0.343290114 | 0.217 | 0.567 | 1.04E-05   | 5 |
| Tpd52l2       | 0.254952041 | 0.085 | 0.31  | 1.36E-05   | 5 |
| Dram2         | 0.289271801 | 0.151 | 0.426 | 1.49E-05   | 5 |
| Eif2s2        | 0.308526625 | 0.274 | 0.635 | 1.74E-05   | 5 |
| Rpl31         | 0.419319545 | 0.821 | 0.949 | 2.33E-05   | 5 |
| Ciptm1l       | 0.307318668 | 0.132 | 0.397 | 2.36E-05   | 5 |
| Ik            | 0.271447267 | 0.142 | 0.406 | 2.45E-05   | 5 |
| Yipf4         | 0.338950539 | 0.151 | 0.415 | 2.64E-05   | 5 |
| Mrps33        | 0.291553513 | 0.236 | 0.573 | 2.80E-05   | 5 |
| Gnpda1        | 0.33557215  | 0.075 | 0.287 | 3.31E-05   | 5 |
| Asna1         | 0.33916391  | 0.123 | 0.366 | 3.69E-05   | 5 |
| Anp32b        | 0.266833225 | 0.274 | 0.64  | 3.73E-05   | 5 |
| Hsbp1         | 0.324881852 | 0.292 | 0.664 | 3.76E-05   | 5 |
| Mvb12a        | 0.250825149 | 0.113 | 0.346 | 3.80E-05   | 5 |
| Nme1          | 0.267646243 | 0.274 | 0.64  | 3.91E-05   | 5 |
| Anapc13       | 0.281531464 | 0.208 | 0.531 | 4.34E-05   | 5 |
| Uqcr10        | 0.320881682 | 0.33  | 0.76  | 4.47E-05   | 5 |
| Cmpk1         | 0.323581294 | 0.255 | 0.604 | 4.60E-05   | 5 |
| Tbcb          | 0.342769488 | 0.236 | 0.573 | 4.92E-05   | 5 |
| Snrpc         | 0.267616952 | 0.198 | 0.495 | 5.21E-05   | 5 |
| Bgn           | 1.159030352 | 0.538 | 0.586 | 5.49E-05   | 5 |
| Commd8        | 0.30767382  | 0.198 | 0.489 | 5.93E-05   | 5 |
| Park7         | 0.30733644  | 0.311 | 0.72  | 6.30E-05   | 5 |
| Ino80e        | 0.269028538 | 0.075 | 0.274 | 6.97E-05   | 5 |
| Mirps16       | 0.272408423 | 0.16  | 0.418 | 6.99E-05   | 5 |
| Ndufv1        | 0.257202248 | 0.113 | 0.339 | 7.10E-05   | 5 |
| Ndufa5        | 0.319120213 | 0.217 | 0.522 | 7.35E-05   | 5 |
| Dnajc19       | 0.303088639 | 0.17  | 0.436 | 7.41E-05   | 5 |
| Tsg101        | 0.333684528 | 0.132 | 0.378 | 7.70E-05   | 5 |
| Mcts1         | 0.275805374 | 0.16  | 0.415 | 7.97E-05   | 5 |
| Cd302         | 0.317984915 | 0.208 | 0.508 | 9.32E-05   | 5 |
| Rps2          | 0.303937249 | 0.877 | 0.95  | 9.82E-05   | 5 |
| Mrpl28        | 0.350226357 | 0.16  | 0.416 | 0.00010404 | 5 |
| Apobec1       | 0.2856988   | 0.132 | 0.365 | 0.00010685 | 5 |
| Polr2g        | 0.255947068 | 0.179 | 0.457 | 0.00010803 | 5 |
| Prmt1         | 0.254951451 | 0.132 | 0.365 | 0.00010807 | 5 |
| Cd63          | 0.725640133 | 0.66  | 0.669 | 0.00011278 | 5 |
| Ctnnb1        | 0.279709172 | 0.113 | 0.336 | 0.0001172  | 5 |
| Chmp5         | 0.291783016 | 0.17  | 0.44  | 0.00012021 | 5 |
| Gm2000        | 0.306394171 | 0.245 | 0.575 | 0.00012365 | 5 |
| Sertad1       | 0.278132245 | 0.085 | 0.283 | 0.00012859 | 5 |
| Txndc17       | 0.322981184 | 0.283 | 0.658 | 0.00013448 | 5 |
| Dap           | 0.250268533 | 0.179 | 0.45  | 0.00013641 | 5 |
| Cltb          | 0.343392149 | 0.123 | 0.342 | 0.00015083 | 5 |



|               |             |       |       |            |   |
|---------------|-------------|-------|-------|------------|---|
| Rsl24d1       | 0.287909289 | 0.075 | 0.263 | 0.00015801 | 5 |
| Fundc2        | 0.293056    | 0.16  | 0.406 | 0.00017786 | 5 |
| Snf8          | 0.276094056 | 0.198 | 0.473 | 0.0001891  | 5 |
| Zeb2os        | 0.282945965 | 0.085 | 0.273 | 0.00018972 | 5 |
| G3bp1         | 0.33248097  | 0.208 | 0.497 | 0.00021588 | 5 |
| Rragc         | 0.289998764 | 0.151 | 0.383 | 0.00023102 | 5 |
| Romo1         | 0.326397408 | 0.264 | 0.605 | 0.0002454  | 5 |
| Pdrg1         | 0.255945669 | 0.075 | 0.252 | 0.00025212 | 5 |
| Fabp5         | 1.49769575  | 0.33  | 0.224 | 0.00025636 | 5 |
| Ndufv2        | 0.308380652 | 0.245 | 0.581 | 0.00027012 | 5 |
| Rps12         | 0.391230092 | 0.755 | 0.938 | 0.00027335 | 5 |
| Gsn           | 1.164764513 | 0.604 | 0.713 | 0.00028776 | 5 |
| Clec4a2       | 0.274169264 | 0.198 | 0.454 | 0.00030399 | 5 |
| Bcl2l1        | 0.251562259 | 0.104 | 0.289 | 0.00034439 | 5 |
| Lrp1          | 0.427300347 | 0.17  | 0.402 | 0.0003794  | 5 |
| Abhd12        | 0.330857456 | 0.245 | 0.533 | 0.0003855  | 5 |
| Dctn3         | 0.274026162 | 0.245 | 0.553 | 0.00039908 | 5 |
| Uqcrq         | 0.29399204  | 0.368 | 0.789 | 0.00040707 | 5 |
| Lgals1        | 0.429027832 | 0.811 | 0.891 | 0.00043109 | 5 |
| Tmed3         | 0.399420396 | 0.236 | 0.527 | 0.000445   | 5 |
| Tuba1a        | 0.258323199 | 0.236 | 0.526 | 0.00045199 | 5 |
| Snapc5        | 0.316967658 | 0.208 | 0.467 | 0.00046858 | 5 |
| Spcs1         | 0.352628291 | 0.311 | 0.696 | 0.00048566 | 5 |
| Cuedc2        | 0.368577077 | 0.179 | 0.423 | 0.00050884 | 5 |
| Pih1d1        | 0.294205236 | 0.094 | 0.273 | 0.00053378 | 5 |
| Vdac1         | 0.387694409 | 0.198 | 0.461 | 0.00053994 | 5 |
| Paics         | 0.362062863 | 0.094 | 0.276 | 0.00054132 | 5 |
| Rpl26         | 0.307886638 | 0.943 | 0.961 | 0.00055178 | 5 |
| Hcfc1r1       | 0.378265422 | 0.208 | 0.475 | 0.0005566  | 5 |
| Ptov1         | 0.259096882 | 0.123 | 0.319 | 0.00056203 | 5 |
| Commd3        | 0.373592722 | 0.17  | 0.408 | 0.00066077 | 5 |
| Mrpl48        | 0.338463268 | 0.113 | 0.302 | 0.0006686  | 5 |
| Mrpl51        | 0.283636969 | 0.16  | 0.369 | 0.00070041 | 5 |
| 1500011K16Rik | 0.283489651 | 0.132 | 0.336 | 0.0007017  | 5 |
| Cox7b         | 0.342343719 | 0.34  | 0.727 | 0.00072616 | 5 |
| Ntan1         | 0.261808349 | 0.16  | 0.379 | 0.00073564 | 5 |
| Yif1a         | 0.265713547 | 0.104 | 0.286 | 0.00084131 | 5 |
| Fam50a        | 0.294779942 | 0.132 | 0.328 | 0.00090963 | 5 |
| Pgk1          | 0.452138526 | 0.245 | 0.518 | 0.00093826 | 5 |
| Zcchc17       | 0.421124544 | 0.104 | 0.281 | 0.00095324 | 5 |
| Npc2          | 0.501629285 | 0.726 | 0.885 | 0.00096668 | 5 |
| Mrpl23        | 0.406536826 | 0.264 | 0.573 | 0.00103729 | 5 |
| Hikeshi       | 0.29098591  | 0.132 | 0.326 | 0.0010435  | 5 |
| Pold4         | 0.327887418 | 0.179 | 0.401 | 0.00105157 | 5 |
| Bsg           | 0.287588955 | 0.368 | 0.767 | 0.00117162 | 5 |
| Ndufa7        | 0.265141252 | 0.358 | 0.757 | 0.00119957 | 5 |
| Polr2f        | 0.425507211 | 0.236 | 0.503 | 0.00127723 | 5 |
| March2        | 0.310743909 | 0.17  | 0.373 | 0.00133127 | 5 |
| Cndbp1        | 0.276475638 | 0.094 | 0.257 | 0.00159935 | 5 |
| Lamtor2       | 0.377145379 | 0.33  | 0.692 | 0.00165956 | 5 |
| Gyg           | 0.250410245 | 0.104 | 0.267 | 0.00167095 | 5 |
| Ftl1-ps1      | 0.386192287 | 0.226 | 0.485 | 0.00174561 | 5 |
| Eef1d         | 0.326777812 | 0.358 | 0.759 | 0.00177053 | 5 |
| Hsd17b10      | 0.337649307 | 0.16  | 0.362 | 0.00182933 | 5 |
| Rcn2          | 0.321565156 | 0.104 | 0.268 | 0.00185057 | 5 |
| Rps26         | 0.256911922 | 0.821 | 0.942 | 0.00185946 | 5 |
| Ranbp1        | 0.31481639  | 0.302 | 0.625 | 0.00187544 | 5 |
| Ctsb          | 0.721380043 | 0.821 | 0.849 | 0.00206979 | 5 |
| Akr1a1        | 0.610573704 | 0.613 | 0.824 | 0.00218164 | 5 |
| Polr2m        | 0.326404472 | 0.132 | 0.307 | 0.00219692 | 5 |
| Col3a1        | 1.218406097 | 0.415 | 0.408 | 0.00228634 | 5 |
| Stt3a         | 0.442250999 | 0.142 | 0.334 | 0.00234696 | 5 |
| Atp5o.1       | 0.397340417 | 0.33  | 0.693 | 0.00240991 | 5 |
| Rit1          | 0.33773165  | 0.104 | 0.265 | 0.00255991 | 5 |
| Slc25a4       | 0.391909086 | 0.264 | 0.543 | 0.00264076 | 5 |
| Slirp         | 0.383104278 | 0.236 | 0.494 | 0.00280399 | 5 |
| Stk11         | 0.403693545 | 0.151 | 0.34  | 0.00284871 | 5 |
| Sar1a         | 0.385666288 | 0.208 | 0.439 | 0.00309707 | 5 |
| Atp6v1c1      | 0.373705558 | 0.189 | 0.392 | 0.00320236 | 5 |
| Glo1          | 0.324816407 | 0.151 | 0.336 | 0.00324614 | 5 |
| Ppp1r2        | 0.283881448 | 0.189 | 0.39  | 0.00337124 | 5 |
| Cyb5a         | 0.321002546 | 0.302 | 0.619 | 0.00337527 | 5 |
| Gpx1          | 0.429082653 | 0.764 | 0.868 | 0.00342943 | 5 |
| Rnf7          | 0.493442892 | 0.264 | 0.557 | 0.00353756 | 5 |
| Ptms          | 0.353513131 | 0.302 | 0.593 | 0.00355086 | 5 |
| Minos1        | 0.29461233  | 0.377 | 0.792 | 0.00373587 | 5 |
| Ubtd1         | 0.308185297 | 0.113 | 0.266 | 0.0038176  | 5 |

|               |             |       |       |            |   |
|---------------|-------------|-------|-------|------------|---|
| lmp1          | 0.268800053 | 0.123 | 0.282 | 0.00388479 | 5 |
| Bola3         | 0.528157743 | 0.132 | 0.298 | 0.00388665 | 5 |
| Lamtor4       | 0.32372683  | 0.292 | 0.6   | 0.00390796 | 5 |
| Ufm1          | 0.282822523 | 0.17  | 0.367 | 0.00429179 | 5 |
| Esd           | 0.453010804 | 0.302 | 0.615 | 0.00431002 | 5 |
| Lbh           | 0.317699695 | 0.113 | 0.262 | 0.00486686 | 5 |
| Gltp          | 0.265024184 | 0.368 | 0.728 | 0.00506961 | 5 |
| Pgam1         | 0.382917082 | 0.264 | 0.528 | 0.0052004  | 5 |
| Ndufa1        | 0.384126398 | 0.34  | 0.69  | 0.00521339 | 5 |
| Anxa1         | 0.307485282 | 0.274 | 0.523 | 0.00563692 | 5 |
| Mt2           | 1.110805882 | 0.509 | 0.577 | 0.0057738  | 5 |
| Ndufv3        | 0.460440543 | 0.311 | 0.634 | 0.00578346 | 5 |
| Stx8          | 0.346139761 | 0.151 | 0.316 | 0.00599549 | 5 |
| Itgb5         | 0.349299164 | 0.236 | 0.467 | 0.00654543 | 5 |
| Prdx4         | 0.250346651 | 0.189 | 0.38  | 0.0065728  | 5 |
| Sec14l1       | 0.358192897 | 0.132 | 0.28  | 0.00815224 | 5 |
| Hspb1         | 1.033960264 | 0.302 | 0.251 | 0.00826001 | 5 |
| Tmx1          | 0.342050664 | 0.16  | 0.328 | 0.00886631 | 5 |
| Mrps18a       | 0.376393747 | 0.189 | 0.38  | 0.00914905 | 5 |
| Prdx1         | 0.687987964 | 0.651 | 0.858 | 0.00958005 | 5 |
| Atp5g1        | 0.283904288 | 0.387 | 0.753 | 0.00966221 | 5 |
| Naca          | 0.294402697 | 0.708 | 0.932 | 0.00980435 | 5 |
| Swi5          | 0.618183658 | 0.33  | 0.649 | 0.00985727 | 5 |
| S100a9        | 5.831852864 | 0.96  | 0.02  | 6.48E-204  | 6 |
| Hdc           | 2.891606542 | 0.787 | 0.013 | 6.56E-174  | 6 |
| S100a8        | 6.051934529 | 0.96  | 0.042 | 6.07E-164  | 6 |
| G0s2          | 3.843860649 | 0.773 | 0.028 | 4.91E-136  | 6 |
| Cxcr2         | 1.963947524 | 0.507 | 0.001 | 1.93E-134  | 6 |
| Retnlg        | 3.722440682 | 0.48  | 0.002 | 1.18E-123  | 6 |
| Acod1         | 2.368170523 | 0.6   | 0.014 | 1.90E-118  | 6 |
| Il1r2         | 2.969434743 | 0.867 | 0.07  | 4.06E-109  | 6 |
| Mmp9          | 2.07117699  | 0.547 | 0.013 | 1.13E-106  | 6 |
| Wfdc21        | 2.58882307  | 0.427 | 0.004 | 8.00E-100  | 6 |
| Il1f9         | 1.803025621 | 0.373 | 0.002 | 3.62E-94   | 6 |
| Slpi          | 3.108000674 | 0.653 | 0.05  | 3.01E-79   | 6 |
| Gm5483        | 2.328958618 | 0.28  | 0.003 | 3.55E-66   | 6 |
| Arg2          | 1.969614275 | 0.52  | 0.037 | 4.39E-65   | 6 |
| Il1b          | 3.162696662 | 0.987 | 0.275 | 1.19E-63   | 6 |
| Asprv1        | 1.761789877 | 0.267 | 0.003 | 1.37E-62   | 6 |
| Stfa2l1       | 1.612046535 | 0.253 | 0.002 | 4.53E-62   | 6 |
| Ifitm1        | 2.725060759 | 0.587 | 0.058 | 2.12E-59   | 6 |
| Trem1         | 2.394971011 | 0.653 | 0.083 | 7.54E-59   | 6 |
| Clec4d        | 2.394786786 | 0.867 | 0.208 | 4.60E-57   | 6 |
| Csf3r         | 2.236554807 | 0.693 | 0.11  | 7.38E-55   | 6 |
| Cd300lf       | 2.097230551 | 0.773 | 0.153 | 1.50E-54   | 6 |
| Mxd1          | 2.243981518 | 0.693 | 0.124 | 3.17E-50   | 6 |
| H2-Q10        | 1.424009288 | 0.36  | 0.021 | 7.91E-49   | 6 |
| Hp            | 2.294312246 | 0.6   | 0.082 | 1.03E-48   | 6 |
| Lmnb1         | 2.36532679  | 0.787 | 0.209 | 4.51E-46   | 6 |
| Cd24a         | 1.779093874 | 0.667 | 0.115 | 4.31E-45   | 6 |
| Slc7a11       | 2.212265213 | 0.653 | 0.118 | 6.12E-45   | 6 |
| Srgn          | 2.251375772 | 1     | 0.874 | 1.11E-44   | 6 |
| Msrb1         | 2.366352402 | 0.96  | 0.53  | 4.66E-43   | 6 |
| Ccr1          | 2.38758549  | 0.787 | 0.219 | 1.26E-42   | 6 |
| Upp1          | 1.380433268 | 0.267 | 0.011 | 1.63E-42   | 6 |
| Cxcl3         | 2.492370932 | 0.32  | 0.019 | 2.49E-42   | 6 |
| Lrg1          | 2.102682391 | 0.427 | 0.048 | 3.22E-39   | 6 |
| S100a11       | 2.20111017  | 0.973 | 0.789 | 9.73E-39   | 6 |
| Pglyrp1       | 1.98150671  | 0.613 | 0.122 | 1.35E-37   | 6 |
| Sifn1         | 2.175209943 | 0.6   | 0.123 | 1.47E-37   | 6 |
| Hcar2         | 2.255340284 | 0.427 | 0.051 | 1.68E-37   | 6 |
| Cebpb         | 1.736254613 | 0.973 | 0.748 | 1.11E-36   | 6 |
| Tyrobp        | 1.134401968 | 1     | 0.817 | 1.45E-35   | 6 |
| Clec4e        | 2.12621522  | 0.667 | 0.183 | 1.05E-32   | 6 |
| Btg1          | 1.420183587 | 0.987 | 0.805 | 2.95E-32   | 6 |
| Eif1          | 0.870730835 | 1     | 0.981 | 2.36E-29   | 6 |
| Gadd45a       | 1.728220341 | 0.453 | 0.08  | 6.38E-29   | 6 |
| Fth1          | 1.140085377 | 1     | 0.998 | 1.09E-28   | 6 |
| Ets2          | 1.710059845 | 0.693 | 0.289 | 1.14E-24   | 6 |
| Cxcl2         | 1.745046787 | 0.92  | 0.57  | 2.46E-24   | 6 |
| Mcemp1        | 1.471027855 | 0.44  | 0.097 | 3.98E-23   | 6 |
| Cd44          | 1.808184284 | 0.76  | 0.447 | 8.86E-23   | 6 |
| Sell          | 1.490189888 | 0.387 | 0.073 | 5.19E-22   | 6 |
| S100a6        | 1.316398561 | 0.933 | 0.866 | 2.92E-21   | 6 |
| Z310001H17Rik | 1.627827489 | 0.493 | 0.145 | 6.58E-21   | 6 |
| Samsn1        | 1.724938993 | 0.667 | 0.318 | 1.65E-20   | 6 |
| Cd9           | 1.456103233 | 0.827 | 0.518 | 2.31E-20   | 6 |

|               |             |       |       |          |   |
|---------------|-------------|-------|-------|----------|---|
| Malat1        | 0.691888927 | 1     | 0.987 | 3.15E-20 | 6 |
| Il1rn         | 1.803680685 | 0.533 | 0.17  | 3.16E-20 | 6 |
| Ptgs2         | 1.435396475 | 0.387 | 0.083 | 8.11E-20 | 6 |
| Sirpb1b       | 1.476801851 | 0.4   | 0.095 | 2.33E-19 | 6 |
| Mcl1          | 1.370270419 | 0.813 | 0.666 | 4.81E-19 | 6 |
| Acta2         | 1.065224873 | 0.88  | 0.723 | 5.29E-19 | 6 |
| Cdk2ap2       | 1.863937705 | 0.8   | 0.659 | 3.74E-18 | 6 |
| Il1rap        | 1.172328913 | 0.253 | 0.038 | 6.55E-18 | 6 |
| Gabarap       | 0.840319216 | 0.92  | 0.899 | 9.30E-18 | 6 |
| Nudt4         | 1.609231029 | 0.547 | 0.217 | 9.77E-18 | 6 |
| Rnf149        | 1.600126699 | 0.667 | 0.399 | 6.66E-17 | 6 |
| Plaur         | 1.992529526 | 0.627 | 0.323 | 1.27E-16 | 6 |
| Tnfaip2       | 1.643709909 | 0.52  | 0.199 | 1.50E-16 | 6 |
| Grina         | 1.65463408  | 0.653 | 0.407 | 1.33E-15 | 6 |
| Gsr           | 1.492608896 | 0.587 | 0.277 | 2.17E-15 | 6 |
| Trim30b       | 1.055790829 | 0.267 | 0.051 | 4.14E-15 | 6 |
| Ifitm2        | 1.004029987 | 0.893 | 0.761 | 6.47E-15 | 6 |
| Trem3         | 1.050869494 | 0.253 | 0.047 | 8.88E-15 | 6 |
| Rab11fip1     | 1.222988061 | 0.347 | 0.093 | 1.51E-14 | 6 |
| Map1lc3b      | 1.146404765 | 0.773 | 0.766 | 2.63E-14 | 6 |
| Osgin1        | 1.198338403 | 0.253 | 0.05  | 8.60E-14 | 6 |
| Alox5ap       | 0.918356048 | 0.88  | 0.705 | 8.88E-14 | 6 |
| Plek          | 1.537426969 | 0.68  | 0.536 | 2.29E-13 | 6 |
| H3f3a         | 0.53929643  | 0.933 | 0.942 | 5.33E-13 | 6 |
| Fxyd5         | 0.637996738 | 0.92  | 0.895 | 6.72E-13 | 6 |
| Klf2          | 1.369855584 | 0.747 | 0.545 | 9.53E-13 | 6 |
| Litaf         | 1.219784615 | 0.72  | 0.615 | 1.69E-12 | 6 |
| Cass4         | 0.980860898 | 0.267 | 0.062 | 1.69E-12 | 6 |
| Cd33          | 1.222039542 | 0.52  | 0.264 | 2.38E-12 | 6 |
| Tpd52         | 1.121905257 | 0.72  | 0.611 | 5.08E-12 | 6 |
| Pim1          | 1.279222865 | 0.773 | 0.64  | 9.40E-12 | 6 |
| Pnrc1         | 1.099084969 | 0.773 | 0.749 | 1.02E-11 | 6 |
| Slc16a3       | 1.630070588 | 0.4   | 0.152 | 1.15E-11 | 6 |
| Cd52          | 0.6440767   | 0.96  | 0.878 | 4.84E-11 | 6 |
| Trib1         | 1.325140543 | 0.573 | 0.358 | 6.90E-11 | 6 |
| Gcnt2         | 1.095067115 | 0.293 | 0.088 | 1.02E-10 | 6 |
| Vasp          | 1.042993754 | 0.68  | 0.573 | 1.20E-10 | 6 |
| Hbb-bs        | 1.229593256 | 0.587 | 0.357 | 1.24E-10 | 6 |
| Thbs1         | 1.884146067 | 0.347 | 0.118 | 1.45E-10 | 6 |
| Actg1         | 0.645686383 | 0.973 | 0.972 | 2.40E-10 | 6 |
| Pfn1          | 0.464035505 | 1     | 0.98  | 3.81E-10 | 6 |
| Stkl7b        | 1.268091634 | 0.653 | 0.56  | 7.93E-10 | 6 |
| Sorl1         | 1.072852379 | 0.36  | 0.141 | 1.30E-09 | 6 |
| Txn1          | 1.071655095 | 0.747 | 0.788 | 1.50E-09 | 6 |
| Tgm2          | 1.329311973 | 0.413 | 0.189 | 2.35E-09 | 6 |
| Ube2b         | 1.101080291 | 0.653 | 0.617 | 6.48E-09 | 6 |
| Atp6v1g1      | 0.760523959 | 0.747 | 0.802 | 1.05E-08 | 6 |
| Lst1          | 1.137488784 | 0.64  | 0.53  | 1.53E-08 | 6 |
| Cd53          | 0.825409703 | 0.76  | 0.822 | 2.03E-08 | 6 |
| AA467197      | 0.812410718 | 0.44  | 0.191 | 2.17E-08 | 6 |
| Ier3          | 1.107970154 | 0.627 | 0.455 | 5.33E-08 | 6 |
| Emilin2       | 1.365738508 | 0.467 | 0.288 | 5.72E-08 | 6 |
| Cxcr4         | 1.59857793  | 0.387 | 0.189 | 6.12E-08 | 6 |
| Cd14          | 1.286056964 | 0.707 | 0.632 | 7.14E-08 | 6 |
| Nlrp3         | 1.152827279 | 0.453 | 0.27  | 1.42E-07 | 6 |
| CSar1         | 0.85333326  | 0.64  | 0.509 | 1.78E-07 | 6 |
| Nfkbia        | 1.134274737 | 0.733 | 0.782 | 1.81E-07 | 6 |
| Ccl6          | 1.282817374 | 0.72  | 0.611 | 2.62E-07 | 6 |
| Dusp1         | 0.602145047 | 0.88  | 0.812 | 3.83E-07 | 6 |
| Fcer1g        | 0.512105403 | 0.973 | 0.822 | 5.18E-07 | 6 |
| Adam8         | 1.121272378 | 0.333 | 0.153 | 5.34E-07 | 6 |
| Prdx5         | 0.788529708 | 0.693 | 0.746 | 6.72E-07 | 6 |
| Adipor1       | 1.068688295 | 0.6   | 0.593 | 7.67E-07 | 6 |
| Cks2          | 1.500446674 | 0.413 | 0.239 | 8.76E-07 | 6 |
| Sem1          | 0.552406409 | 0.787 | 0.89  | 8.95E-07 | 6 |
| Mrpl33        | 0.965598253 | 0.667 | 0.694 | 9.51E-07 | 6 |
| Cox17         | 1.366665615 | 0.613 | 0.631 | 9.55E-07 | 6 |
| Osm           | 1.085748535 | 0.453 | 0.271 | 1.11E-06 | 6 |
| Dgat1         | 1.115894612 | 0.28  | 0.116 | 1.22E-06 | 6 |
| Gadd45b       | 1.194174716 | 0.52  | 0.391 | 1.27E-06 | 6 |
| Lilr4b        | 1.31437072  | 0.573 | 0.508 | 1.53E-06 | 6 |
| Sirpb1c       | 1.151473389 | 0.333 | 0.159 | 1.83E-06 | 6 |
| Myl6          | 0.26544025  | 0.987 | 0.974 | 2.00E-06 | 6 |
| 2810474019Rik | 1.361335348 | 0.44  | 0.287 | 2.18E-06 | 6 |
| Jaml          | 1.225678657 | 0.28  | 0.122 | 3.19E-06 | 6 |
| Gmfg          | 0.869505587 | 0.68  | 0.786 | 3.85E-06 | 6 |
| Ube2d3        | 0.548704394 | 0.773 | 0.857 | 5.93E-06 | 6 |

|               |             |       |       |            |   |
|---------------|-------------|-------|-------|------------|---|
| Sdcbp         | 0.527771859 | 0.747 | 0.805 | 6.20E-06   | 6 |
| Marcks11      | 1.197954864 | 0.573 | 0.494 | 7.50E-06   | 6 |
| Taldo1        | 0.932032367 | 0.653 | 0.749 | 8.60E-06   | 6 |
| Btg2          | 0.793778584 | 0.707 | 0.731 | 1.04E-05   | 6 |
| Junb          | 0.412336425 | 0.907 | 0.897 | 1.11E-05   | 6 |
| Lcp1          | 0.604214943 | 0.773 | 0.802 | 1.16E-05   | 6 |
| Cd300ld       | 1.261612366 | 0.427 | 0.296 | 1.17E-05   | 6 |
| Snx20         | 1.195819095 | 0.52  | 0.455 | 1.18E-05   | 6 |
| Tagln         | 0.883411999 | 0.533 | 0.423 | 1.26E-05   | 6 |
| Rnf11         | 1.054446782 | 0.333 | 0.189 | 2.22E-05   | 6 |
| Snap23        | 1.030311699 | 0.547 | 0.51  | 2.34E-05   | 6 |
| Ltb           | 0.791662344 | 0.347 | 0.171 | 3.07E-05   | 6 |
| Rab20         | 1.157906046 | 0.427 | 0.309 | 3.93E-05   | 6 |
| Fosl2         | 1.110697892 | 0.413 | 0.295 | 6.37E-05   | 6 |
| Ptafr         | 0.958990787 | 0.467 | 0.377 | 6.63E-05   | 6 |
| Txnip         | 1.013392679 | 0.467 | 0.344 | 7.58E-05   | 6 |
| 1600010M07Rik | 1.150382129 | 0.267 | 0.134 | 8.37E-05   | 6 |
| Selenok       | 0.602504861 | 0.693 | 0.84  | 9.45E-05   | 6 |
| Nfe2l2        | 0.950099441 | 0.533 | 0.517 | 9.59E-05   | 6 |
| Ppp1r2        | 1.042032464 | 0.453 | 0.369 | 9.77E-05   | 6 |
| Arc3          | 0.483688846 | 0.773 | 0.899 | 0.00011541 | 6 |
| Rtp4          | 1.283653331 | 0.427 | 0.321 | 0.00013946 | 6 |
| Csrnp1        | 0.850880616 | 0.493 | 0.43  | 0.00014517 | 6 |
| Cyp4f18       | 0.947000204 | 0.387 | 0.258 | 0.00014649 | 6 |
| Hist1h2bc     | 0.890690367 | 0.427 | 0.313 | 0.00017749 | 6 |
| Atp5v0e       | 0.531896937 | 0.72  | 0.838 | 0.00018053 | 6 |
| Fgl2          | 1.085420966 | 0.4   | 0.293 | 0.00019749 | 6 |
| Rgcc          | 0.872591028 | 0.267 | 0.131 | 0.00019976 | 6 |
| Pkm           | 0.611734458 | 0.68  | 0.819 | 0.00020472 | 6 |
| Sfn2          | 0.760324844 | 0.613 | 0.656 | 0.00024028 | 6 |
| Pilra         | 0.999199207 | 0.373 | 0.266 | 0.00041767 | 6 |
| Siglece       | 1.025131351 | 0.307 | 0.193 | 0.00044539 | 6 |
| lsg15         | 1.196381286 | 0.4   | 0.294 | 0.00044886 | 6 |
| Gda           | 1.033787665 | 0.387 | 0.28  | 0.00047746 | 6 |
| Coro1a        | 0.487418422 | 0.8   | 0.84  | 0.00050307 | 6 |
| Cr1l          | 0.261680842 | 0.133 | 0.382 | 0.00067337 | 6 |
| Anxa2         | 0.639453644 | 0.653 | 0.686 | 0.00071992 | 6 |
| Ier5          | 0.760603376 | 0.627 | 0.684 | 0.00081079 | 6 |
| Actb          | 0.529341101 | 1     | 0.983 | 0.00097402 | 6 |
| Atp6v1c1      | 0.273377165 | 0.147 | 0.389 | 0.00103107 | 6 |
| Bnip2         | 0.25718284  | 0.2   | 0.493 | 0.00122354 | 6 |
| Sap18         | 0.455139652 | 0.227 | 0.497 | 0.00152641 | 6 |
| Ccrl2         | 1.641519403 | 0.467 | 0.443 | 0.00158744 | 6 |
| Tes           | 0.944981806 | 0.32  | 0.227 | 0.00168807 | 6 |
| Fam107b       | 1.041138948 | 0.373 | 0.287 | 0.00191488 | 6 |
| Ddx5          | 0.274350883 | 0.787 | 0.917 | 0.00193035 | 6 |
| Rac2          | 0.622568366 | 0.64  | 0.749 | 0.00223281 | 6 |
| Supt4a        | 0.782642806 | 0.56  | 0.63  | 0.00247599 | 6 |
| Gpcpd1        | 1.060833361 | 0.32  | 0.231 | 0.00258769 | 6 |
| Ppp1r15a      | 0.995360857 | 0.507 | 0.546 | 0.00260902 | 6 |
| Hba-a2        | 0.792499245 | 0.293 | 0.191 | 0.00283778 | 6 |
| Ppp1r12a      | 0.282206431 | 0.2   | 0.43  | 0.00310474 | 6 |
| Gng5          | 0.379902891 | 0.733 | 0.882 | 0.0031601  | 6 |
| Dennd4a       | 0.928479696 | 0.427 | 0.4   | 0.00326077 | 6 |
| Jmjd1c        | 0.296786863 | 0.147 | 0.359 | 0.00326463 | 6 |
| Xbp1          | 0.906087844 | 0.493 | 0.525 | 0.00337615 | 6 |
| Ski           | 0.250867196 | 0.093 | 0.259 | 0.00511288 | 6 |
| H2afj         | 0.666560764 | 0.547 | 0.667 | 0.00572562 | 6 |
| Irf2bp2       | 0.435529296 | 0.12  | 0.309 | 0.00594177 | 6 |
| Adgre5        | 0.68543629  | 0.4   | 0.355 | 0.00610546 | 6 |
| Ostf1         | 0.622103125 | 0.627 | 0.804 | 0.00657689 | 6 |
| Dok3          | 0.311678761 | 0.16  | 0.362 | 0.00658603 | 6 |
| Bcl2a1a       | 1.168395282 | 0.32  | 0.247 | 0.00903389 | 6 |
| Cebpd         | 0.873272769 | 0.4   | 0.359 | 0.0090504  | 6 |
| Ccl3          | 1.20525517  | 0.467 | 0.428 | 0.00990334 | 6 |
| Ccr9          | 2.813845138 | 0.949 | 0.004 | 5.14E-233  | 7 |
| Dntt          | 2.702782174 | 0.769 | 0.001 | 1.30E-206  | 7 |
| Endou         | 1.97077366  | 0.718 | 0     | 5.72E-199  | 7 |
| Arpp21        | 1.86576429  | 0.615 | 0     | 2.63E-170  | 7 |
| Gm15340       | 1.841861659 | 0.538 | 0.002 | 6.63E-136  | 7 |
| Rag1          | 1.75936998  | 0.487 | 0     | 1.01E-134  | 7 |
| A930003A15Rik | 1.467188451 | 0.436 | 0     | 1.46E-120  | 7 |
| Dgkeos        | 1.486481919 | 0.41  | 0     | 1.70E-113  | 7 |
| Myb           | 1.767842845 | 0.59  | 0.01  | 4.19E-107  | 7 |
| Tctex1d1      | 1.318031483 | 0.385 | 0     | 1.93E-106  | 7 |
| Cd8b1         | 2.688481746 | 0.949 | 0.047 | 3.07E-102  | 7 |
| Satb1         | 3.036361423 | 0.974 | 0.064 | 1.09E-94   | 7 |

|           |             |       |       |          |   |
|-----------|-------------|-------|-------|----------|---|
| Aqp11     | 1.574394745 | 0.436 | 0.004 | 5.50E-93 | 7 |
| Cd8a      | 2.308415844 | 0.846 | 0.045 | 1.09E-87 | 7 |
| Tcf7      | 2.583364431 | 0.821 | 0.045 | 8.18E-87 | 7 |
| Sox4      | 2.628100708 | 0.718 | 0.035 | 5.16E-80 | 7 |
| Rapgef3   | 1.146760142 | 0.333 | 0.002 | 6.73E-80 | 7 |
| Ldhb      | 2.197221171 | 0.846 | 0.068 | 9.65E-70 | 7 |
| Ly6d      | 2.105403363 | 0.513 | 0.017 | 9.29E-67 | 7 |
| Trat1     | 1.104306795 | 0.333 | 0.005 | 1.00E-62 | 7 |
| Cd4       | 1.639612341 | 0.538 | 0.023 | 2.93E-62 | 7 |
| Trbc2     | 3.270941779 | 1     | 0.131 | 9.52E-61 | 7 |
| Lat       | 2.422467796 | 0.974 | 0.119 | 1.71E-59 | 7 |
| Themis    | 1.570119562 | 0.487 | 0.02  | 1.02E-57 | 7 |
| Cd3e      | 2.15400507  | 0.923 | 0.104 | 1.20E-57 | 7 |
| Lck       | 2.465777419 | 0.897 | 0.106 | 8.80E-57 | 7 |
| Cd3g      | 1.946934306 | 0.974 | 0.115 | 1.05E-54 | 7 |
| Cd27      | 2.292746302 | 0.795 | 0.081 | 1.33E-54 | 7 |
| Tubb2b    | 2.190701016 | 0.667 | 0.052 | 1.89E-54 | 7 |
| Txk       | 1.963089948 | 0.718 | 0.067 | 1.76E-50 | 7 |
| Rnf157    | 1.765681452 | 0.513 | 0.029 | 2.13E-50 | 7 |
| Nsg2      | 1.031755493 | 0.282 | 0.005 | 2.99E-50 | 7 |
| Cd247     | 1.739671183 | 0.744 | 0.079 | 3.33E-47 | 7 |
| Cd3d      | 1.962030076 | 0.872 | 0.111 | 1.48E-46 | 7 |
| Sit1      | 1.658651551 | 0.538 | 0.037 | 8.93E-46 | 7 |
| Sh2d1a    | 1.561158716 | 0.564 | 0.045 | 4.55E-43 | 7 |
| Gm5914    | 1.514146938 | 0.462 | 0.028 | 2.66E-42 | 7 |
| Spint2    | 1.88848566  | 0.718 | 0.091 | 7.40E-41 | 7 |
| Ssbp2     | 1.980878816 | 0.667 | 0.079 | 4.13E-40 | 7 |
| Cd24a     | 2.018768422 | 0.821 | 0.126 | 4.32E-39 | 7 |
| Trac      | 2.031598011 | 0.744 | 0.097 | 1.18E-38 | 7 |
| Thy1      | 2.082283612 | 0.872 | 0.149 | 2.27E-38 | 7 |
| Ntrk3     | 0.984861337 | 0.282 | 0.01  | 6.66E-37 | 7 |
| Trbc1     | 3.235527702 | 0.692 | 0.094 | 7.51E-37 | 7 |
| Bcl11b    | 1.628278482 | 0.564 | 0.056 | 9.12E-37 | 7 |
| Lef1      | 1.592488984 | 0.41  | 0.028 | 4.17E-35 | 7 |
| Camk4     | 1.02904514  | 0.385 | 0.024 | 3.93E-34 | 7 |
| Frat2     | 1.636518568 | 0.59  | 0.07  | 6.84E-34 | 7 |
| Ets1      | 1.840455521 | 0.769 | 0.138 | 2.20E-33 | 7 |
| Arl5c     | 2.151446096 | 0.795 | 0.161 | 3.93E-32 | 7 |
| Sept1     | 1.47194764  | 0.744 | 0.132 | 1.01E-29 | 7 |
| Hist3h2ba | 1.79577673  | 0.538 | 0.068 | 1.28E-29 | 7 |
| Cd28      | 1.797240704 | 0.538 | 0.074 | 1.68E-26 | 7 |
| Dusp10    | 1.618282291 | 0.487 | 0.061 | 2.05E-26 | 7 |
| Sla2      | 1.422502661 | 0.385 | 0.036 | 3.38E-26 | 7 |
| Ppp1r16b  | 1.761048747 | 0.513 | 0.069 | 5.43E-26 | 7 |
| Jakmip1   | 1.327966556 | 0.436 | 0.049 | 3.10E-25 | 7 |
| Skap1     | 1.339731062 | 0.615 | 0.108 | 2.46E-24 | 7 |
| Ramp1     | 1.76381013  | 0.872 | 0.303 | 3.72E-24 | 7 |
| Itk       | 1.205150163 | 0.436 | 0.052 | 6.02E-24 | 7 |
| Socs1     | 1.583008201 | 0.513 | 0.077 | 7.28E-24 | 7 |
| Atl2      | 1.422152863 | 0.462 | 0.062 | 2.22E-23 | 7 |
| Clk3      | 1.908688886 | 0.795 | 0.26  | 4.71E-23 | 7 |
| Mier1     | 1.935571383 | 0.718 | 0.199 | 3.34E-22 | 7 |
| Slc35d1   | 1.063797219 | 0.333 | 0.032 | 4.83E-22 | 7 |
| Znrf1     | 1.596939495 | 0.718 | 0.198 | 4.89E-22 | 7 |
| Trp53i11  | 1.237773362 | 0.41  | 0.051 | 5.63E-22 | 7 |
| Rgcc      | 1.54311341  | 0.59  | 0.125 | 3.99E-19 | 7 |
| Vps37b    | 1.436564257 | 0.769 | 0.249 | 1.68E-18 | 7 |
| Dusp5     | 1.608582535 | 0.795 | 0.291 | 2.22E-18 | 7 |
| Tespa1    | 1.399336923 | 0.41  | 0.063 | 4.14E-18 | 7 |
| Plcx2     | 0.991273259 | 0.282 | 0.028 | 8.64E-18 | 7 |
| Gimap9    | 1.351924031 | 0.436 | 0.074 | 8.72E-18 | 7 |
| Rmnd5a    | 1.580609396 | 0.513 | 0.108 | 1.05E-17 | 7 |
| H3f3b     | 0.92260548  | 1     | 0.958 | 1.28E-17 | 7 |
| Rhoh      | 1.84052079  | 0.692 | 0.237 | 2.29E-17 | 7 |
| Xrcc6     | 1.392822833 | 0.436 | 0.078 | 4.13E-17 | 7 |
| Saraf     | 1.422493601 | 0.897 | 0.644 | 5.05E-17 | 7 |
| Cdca7     | 1.01917319  | 0.282 | 0.031 | 1.39E-16 | 7 |
| Ubb       | 0.703979464 | 1     | 0.984 | 1.76E-16 | 7 |
| Gramd3    | 1.852232839 | 0.513 | 0.12  | 5.62E-16 | 7 |
| Cnn3      | 1.299552712 | 0.385 | 0.062 | 5.64E-16 | 7 |
| Hmgb1     | 1.41907667  | 0.923 | 0.787 | 8.71E-16 | 7 |
| Malat1    | 1.048774266 | 1     | 0.988 | 2.12E-15 | 7 |
| Prkcq     | 0.842915033 | 0.308 | 0.041 | 6.42E-15 | 7 |
| Traf4     | 0.916679898 | 0.256 | 0.028 | 6.96E-15 | 7 |
| Eif1      | 0.664126194 | 1     | 0.981 | 1.68E-14 | 7 |
| Gtf2h4    | 1.226296144 | 0.41  | 0.083 | 2.77E-14 | 7 |
| Snx18     | 1.715551511 | 0.692 | 0.296 | 3.38E-14 | 7 |

|           |             |       |       |          |   |
|-----------|-------------|-------|-------|----------|---|
| Ptprcap   | 1.141338418 | 0.59  | 0.148 | 5.68E-14 | 7 |
| Patz1     | 1.04040838  | 0.308 | 0.047 | 1.39E-13 | 7 |
| Prkca     | 1.222478608 | 0.359 | 0.065 | 1.99E-13 | 7 |
| Gimap1    | 1.060760641 | 0.487 | 0.112 | 2.48E-13 | 7 |
| Rnf125    | 0.858431135 | 0.282 | 0.04  | 3.14E-13 | 7 |
| Limd2     | 1.412821229 | 0.821 | 0.517 | 3.64E-13 | 7 |
| Cyb5a     | 1.305758424 | 0.846 | 0.585 | 4.14E-13 | 7 |
| Nabp1     | 1.250236982 | 0.564 | 0.18  | 4.77E-13 | 7 |
| Gimap6    | 1.291216249 | 0.538 | 0.151 | 5.69E-13 | 7 |
| Srsf5     | 1.124369614 | 0.897 | 0.788 | 6.15E-13 | 7 |
| Arhgap45  | 1.419316445 | 0.769 | 0.512 | 3.50E-12 | 7 |
| Tubb2a    | 2.01127197  | 0.718 | 0.408 | 3.77E-12 | 7 |
| Ddx5      | 0.745661954 | 1     | 0.907 | 5.26E-12 | 7 |
| Ezr       | 1.323567893 | 0.692 | 0.354 | 1.14E-11 | 7 |
| Metap2    | 1.620606232 | 0.744 | 0.49  | 1.26E-11 | 7 |
| Hnrnpf    | 0.808414818 | 0.923 | 0.816 | 1.93E-11 | 7 |
| Fbxl12    | 0.862270329 | 0.282 | 0.047 | 2.34E-11 | 7 |
| Rbm39     | 0.865451764 | 0.923 | 0.823 | 3.06E-11 | 7 |
| Sept6     | 1.099549938 | 0.487 | 0.148 | 3.53E-11 | 7 |
| Ube2s     | 1.236053284 | 0.795 | 0.609 | 5.91E-11 | 7 |
| Paip2     | 1.017340093 | 0.769 | 0.555 | 7.56E-11 | 7 |
| Klf13     | 1.093914253 | 0.795 | 0.586 | 1.06E-10 | 7 |
| Xist      | 0.986730171 | 0.897 | 0.783 | 2.48E-10 | 7 |
| Rasgrp1   | 1.01526324  | 0.359 | 0.086 | 4.91E-10 | 7 |
| Rnf145    | 1.495091107 | 0.487 | 0.177 | 9.53E-10 | 7 |
| Ap3s1     | 1.201713585 | 0.718 | 0.49  | 9.90E-10 | 7 |
| Rcsd1     | 1.160531217 | 0.59  | 0.282 | 1.49E-09 | 7 |
| Edem1     | 1.259253691 | 0.641 | 0.356 | 1.88E-09 | 7 |
| Slc25a5   | 0.765898424 | 0.872 | 0.828 | 3.44E-09 | 7 |
| Prdx6     | 1.109268595 | 0.769 | 0.53  | 7.23E-09 | 7 |
| Hnrnpa1   | 1.022334263 | 0.744 | 0.571 | 8.43E-09 | 7 |
| Nono      | 1.140962878 | 0.667 | 0.436 | 8.51E-09 | 7 |
| Ezh2      | 0.957634543 | 0.333 | 0.089 | 1.58E-08 | 7 |
| Taf7      | 1.134071538 | 0.436 | 0.154 | 2.07E-08 | 7 |
| H2afv     | 1.169947087 | 0.667 | 0.449 | 2.32E-08 | 7 |
| Cnbp      | 0.799643934 | 0.821 | 0.764 | 3.65E-08 | 7 |
| Smc4      | 1.167718785 | 0.513 | 0.23  | 3.96E-08 | 7 |
| Hba-a1    | 1.262215455 | 0.513 | 0.229 | 7.37E-08 | 7 |
| Mapk8     | 0.810393103 | 0.282 | 0.069 | 7.78E-08 | 7 |
| Cdk17     | 0.869073234 | 0.333 | 0.094 | 8.33E-08 | 7 |
| Chmp1b    | 1.094900496 | 0.436 | 0.172 | 1.02E-07 | 7 |
| Hbb-bs    | 1.222809602 | 0.641 | 0.362 | 1.03E-07 | 7 |
| Hnrnpa2b1 | 0.727567539 | 0.846 | 0.763 | 1.34E-07 | 7 |
| Abli1     | 0.964118479 | 0.282 | 0.07  | 1.66E-07 | 7 |
| Rpl27     | 0.513763883 | 0.974 | 0.895 | 1.82E-07 | 7 |
| Hnrnpk    | 0.772772856 | 0.795 | 0.802 | 2.45E-07 | 7 |
| Tra2b     | 0.850815095 | 0.718 | 0.611 | 2.67E-07 | 7 |
| Cirbp     | 1.114583714 | 0.564 | 0.309 | 2.86E-07 | 7 |
| Il21r     | 1.156225684 | 0.513 | 0.261 | 3.18E-07 | 7 |
| H3f3a     | 0.589403821 | 0.949 | 0.941 | 3.31E-07 | 7 |
| Rps27     | 0.278869083 | 1     | 0.987 | 3.82E-07 | 7 |
| Wdr12     | 1.020087867 | 0.333 | 0.105 | 3.91E-07 | 7 |
| Abhd8     | 0.787501999 | 0.333 | 0.102 | 4.05E-07 | 7 |
| Nrip1     | 1.163092868 | 0.41  | 0.16  | 4.65E-07 | 7 |
| Mxd4      | 1.085882223 | 0.513 | 0.264 | 4.94E-07 | 7 |
| Pcbp2     | 0.719946977 | 0.795 | 0.753 | 5.50E-07 | 7 |
| Desi1     | 0.974333518 | 0.385 | 0.143 | 6.06E-07 | 7 |
| Snrnp70   | 1.123029511 | 0.641 | 0.491 | 7.31E-07 | 7 |
| Rps3a1    | 0.333182059 | 1     | 0.952 | 7.44E-07 | 7 |
| Rbm3      | 0.853115998 | 0.769 | 0.727 | 1.21E-06 | 7 |
| Stmn1     | 1.305411911 | 0.462 | 0.197 | 1.25E-06 | 7 |
| Acta2     | 0.485694734 | 0.846 | 0.729 | 1.48E-06 | 7 |
| Zfp422    | 0.930603683 | 0.308 | 0.097 | 1.51E-06 | 7 |
| Eif3h     | 0.63125098  | 0.821 | 0.778 | 1.83E-06 | 7 |
| Pnrc1     | 0.798659121 | 0.795 | 0.749 | 2.05E-06 | 7 |
| Slc38a2   | 0.965447511 | 0.615 | 0.43  | 2.25E-06 | 7 |
| Fus       | 0.991786325 | 0.667 | 0.533 | 2.31E-06 | 7 |
| Sash3     | 0.981555813 | 0.436 | 0.2   | 3.84E-06 | 7 |
| Actn1     | 0.91045457  | 0.436 | 0.198 | 4.34E-06 | 7 |
| Prps2     | 0.833550937 | 0.308 | 0.102 | 4.59E-06 | 7 |
| Sub1      | 0.642976854 | 0.846 | 0.853 | 5.06E-06 | 7 |
| Gpr132    | 1.053925806 | 0.487 | 0.258 | 5.79E-06 | 7 |
| Orai2     | 0.76639253  | 0.256 | 0.074 | 6.25E-06 | 7 |
| Krit1     | 0.90175029  | 0.436 | 0.206 | 6.82E-06 | 7 |
| Rnf167    | 0.94309999  | 0.41  | 0.186 | 8.70E-06 | 7 |
| Rbm3      | 0.857519077 | 0.256 | 0.077 | 9.19E-06 | 7 |
| Cdkn1b    | 0.98396835  | 0.333 | 0.126 | 1.01E-05 | 7 |

|          |             |       |       |            |   |
|----------|-------------|-------|-------|------------|---|
| Atp5h    | 0.48289235  | 0.846 | 0.849 | 1.14E-05   | 7 |
| Usp3     | 0.94983233  | 0.436 | 0.223 | 1.36E-05   | 7 |
| Impdh1   | 0.781776764 | 0.282 | 0.094 | 1.45E-05   | 7 |
| Hbb-bt   | 0.730061594 | 0.256 | 0.077 | 1.50E-05   | 7 |
| Kif5b    | 0.972634184 | 0.59  | 0.469 | 1.61E-05   | 7 |
| Ube2d3   | 0.60342836  | 0.795 | 0.854 | 1.74E-05   | 7 |
| Acap1    | 0.652453528 | 0.256 | 0.078 | 2.00E-05   | 7 |
| Serbp1   | 0.501595958 | 0.769 | 0.743 | 2.14E-05   | 7 |
| Ccng2    | 0.965024668 | 0.333 | 0.135 | 2.61E-05   | 7 |
| Stat5b   | 0.918893136 | 0.282 | 0.1   | 3.01E-05   | 7 |
| Ubn1     | 0.809923531 | 0.462 | 0.263 | 3.19E-05   | 7 |
| Sik1     | 0.803752158 | 0.308 | 0.115 | 3.25E-05   | 7 |
| Ctcf     | 0.986655929 | 0.385 | 0.184 | 3.30E-05   | 7 |
| Gsk3b    | 0.961405143 | 0.513 | 0.329 | 3.31E-05   | 7 |
| Sh2d2a   | 0.725197485 | 0.282 | 0.093 | 3.62E-05   | 7 |
| Hist3h2a | 1.112591424 | 0.462 | 0.26  | 3.80E-05   | 7 |
| Tia1     | 0.741498991 | 0.308 | 0.117 | 3.88E-05   | 7 |
| Polg     | 0.755922867 | 0.282 | 0.1   | 3.99E-05   | 7 |
| Hs2st1   | 0.825500189 | 0.256 | 0.085 | 4.35E-05   | 7 |
| Ptma     | 0.746601296 | 0.949 | 0.934 | 4.46E-05   | 7 |
| Gmfg     | 0.722729593 | 0.769 | 0.78  | 5.37E-05   | 7 |
| Ets2     | 0.924554894 | 0.513 | 0.307 | 5.50E-05   | 7 |
| Rpl7     | 0.341065678 | 0.974 | 0.934 | 5.56E-05   | 7 |
| Sumo2    | 0.663883037 | 0.744 | 0.809 | 5.69E-05   | 7 |
| Fbxw2    | 0.9039443   | 0.487 | 0.313 | 5.96E-05   | 7 |
| Trir     | 0.681396677 | 0.641 | 0.589 | 6.32E-05   | 7 |
| Gpr171   | 0.902720406 | 0.359 | 0.161 | 7.31E-05   | 7 |
| mt-Nd3   | 0.63138907  | 0.667 | 0.631 | 8.78E-05   | 7 |
| Bcl2l1   | 1.054752161 | 0.333 | 0.148 | 8.97E-05   | 7 |
| Ccpg1    | 1.079601681 | 0.333 | 0.147 | 0.00010625 | 7 |
| Aes      | 0.913232854 | 0.641 | 0.58  | 0.00011691 | 7 |
| Son      | 0.688606614 | 0.667 | 0.645 | 0.00011752 | 7 |
| Hspb11   | 0.892436622 | 0.359 | 0.173 | 0.00011988 | 7 |
| Rgs2     | 0.785682608 | 0.692 | 0.577 | 0.00012064 | 7 |
| mt-Co2   | 0.26263515  | 1     | 0.949 | 0.00013039 | 7 |
| Tpt1     | 0.281499864 | 1     | 0.977 | 0.00013156 | 7 |
| Fas      | 0.897841827 | 0.333 | 0.15  | 0.00013559 | 7 |
| Tob1     | 1.035546498 | 0.308 | 0.13  | 0.00015579 | 7 |
| Hba-a2   | 0.900957335 | 0.385 | 0.191 | 0.00015895 | 7 |
| Rps6kb1  | 0.858501368 | 0.333 | 0.156 | 0.00016133 | 7 |
| Tcf12    | 0.826023307 | 0.308 | 0.134 | 0.0001779  | 7 |
| Eif4g2   | 0.726625816 | 0.641 | 0.646 | 0.0001828  | 7 |
| Mef2d    | 0.783089862 | 0.308 | 0.134 | 0.00019631 | 7 |
| Stx6     | 0.996347684 | 0.359 | 0.183 | 0.00019836 | 7 |
| Dnaja1   | 0.980123811 | 0.667 | 0.657 | 0.00022505 | 7 |
| Taf1d    | 1.036713466 | 0.436 | 0.27  | 0.00023046 | 7 |
| Tex30    | 0.769124732 | 0.282 | 0.116 | 0.00023213 | 7 |
| Il2rg    | 1.030703973 | 0.513 | 0.338 | 0.00024487 | 7 |
| Pycard   | 0.640304249 | 0.667 | 0.598 | 0.0002501  | 7 |
| Bnip3l   | 0.819370286 | 0.564 | 0.476 | 0.00025442 | 7 |
| Lztf1l   | 0.824693346 | 0.282 | 0.117 | 0.00025616 | 7 |
| Slc7a11  | 0.821666231 | 0.333 | 0.144 | 0.00029573 | 7 |
| Rpa1     | 0.7121036   | 0.308 | 0.14  | 0.0003078  | 7 |
| Ttc14    | 1.041950433 | 0.41  | 0.241 | 0.00032583 | 7 |
| Lbr      | 0.760763264 | 0.41  | 0.237 | 0.00035356 | 7 |
| Tubb5    | 0.844419375 | 0.692 | 0.684 | 0.00037398 | 7 |
| Gtf3c2   | 0.81572707  | 0.308 | 0.141 | 0.00037531 | 7 |
| Hbp1     | 0.826406589 | 0.385 | 0.207 | 0.0003921  | 7 |
| Tnfaip3  | 0.621297217 | 0.59  | 0.439 | 0.00043453 | 7 |
| Trim11   | 0.872433485 | 0.256 | 0.104 | 0.00045272 | 7 |
| Traf3ip3 | 0.707873077 | 0.282 | 0.118 | 0.0004885  | 7 |
| Csrp1    | 0.783501671 | 0.487 | 0.335 | 0.00053878 | 7 |
| Tnrc6b   | 0.847343613 | 0.359 | 0.197 | 0.0005665  | 7 |
| Tsc22d4  | 0.899167842 | 0.538 | 0.454 | 0.00072718 | 7 |
| Eif3f    | 0.378570738 | 0.846 | 0.857 | 0.00074602 | 7 |
| Oaz1     | 0.377619023 | 0.974 | 0.945 | 0.00074747 | 7 |
| mt-Cytb  | 0.254598795 | 1     | 0.948 | 0.0007652  | 7 |
| Selplg   | 0.586969    | 0.692 | 0.66  | 0.00082358 | 7 |
| Ndufv3   | 0.47917671  | 0.641 | 0.606 | 0.00083282 | 7 |
| Tmed9    | 0.451285759 | 0.692 | 0.7   | 0.00083763 | 7 |
| Snrpe    | 0.602972511 | 0.641 | 0.664 | 0.00084609 | 7 |
| Prkar1a  | 0.690706141 | 0.615 | 0.611 | 0.0009098  | 7 |
| Smc3     | 0.870248747 | 0.359 | 0.208 | 0.00098801 | 7 |
| Btg1     | 0.286792046 | 0.897 | 0.813 | 0.00102458 | 7 |
| Rcvtb2   | 1.150952765 | 0.385 | 0.235 | 0.00108368 | 7 |
| Cabin1   | 0.825810372 | 0.308 | 0.155 | 0.00111542 | 7 |
| Eif3e    | 0.647568775 | 0.667 | 0.674 | 0.0011558  | 7 |

|          |             |       |       |            |   |
|----------|-------------|-------|-------|------------|---|
| Arhgef1  | 0.850596875 | 0.487 | 0.37  | 0.00119421 | 7 |
| Cd47     | 0.605409685 | 0.667 | 0.721 | 0.00122262 | 7 |
| Chd1     | 0.892834476 | 0.256 | 0.115 | 0.00123443 | 7 |
| Arhgdib  | 0.569360271 | 0.795 | 0.854 | 0.00125167 | 7 |
| Ttc19    | 0.725308924 | 0.282 | 0.135 | 0.00135475 | 7 |
| Itgal    | 0.55214728  | 0.308 | 0.146 | 0.00139888 | 7 |
| Atp5d    | 0.405096501 | 0.718 | 0.777 | 0.00154564 | 7 |
| Actr1b   | 0.951971712 | 0.308 | 0.161 | 0.00154797 | 7 |
| Tom20    | 0.676481573 | 0.641 | 0.67  | 0.0016766  | 7 |
| Snu13    | 0.793139106 | 0.564 | 0.586 | 0.00173582 | 7 |
| Rbm25    | 0.908045394 | 0.513 | 0.449 | 0.00174606 | 7 |
| Ubal2    | 0.736371388 | 0.564 | 0.502 | 0.00175062 | 7 |
| Trpc4ap  | 0.96605179  | 0.41  | 0.283 | 0.00192017 | 7 |
| Smarce1  | 0.77492956  | 0.436 | 0.323 | 0.00208    | 7 |
| Itpr2    | 0.672658397 | 0.256 | 0.118 | 0.00213426 | 7 |
| Cox7a2l  | 0.381975114 | 0.769 | 0.807 | 0.00222669 | 7 |
| Bclaf1   | 0.792418007 | 0.436 | 0.322 | 0.00260502 | 7 |
| Srsf3    | 0.646039776 | 0.615 | 0.632 | 0.00271848 | 7 |
| Nop53    | 0.677561364 | 0.641 | 0.684 | 0.00281344 | 7 |
| Eef2     | 0.335954166 | 0.897 | 0.893 | 0.00286896 | 7 |
| Srsf6    | 0.813511592 | 0.513 | 0.473 | 0.00299851 | 7 |
| Rpl13a   | 0.403320663 | 0.795 | 0.831 | 0.00304791 | 7 |
| Slc44a2  | 0.696815021 | 0.308 | 0.167 | 0.00305659 | 7 |
| Pdcd4    | 0.850601894 | 0.359 | 0.215 | 0.00322199 | 7 |
| Emb      | 0.593236489 | 0.538 | 0.423 | 0.00325527 | 7 |
| Stk16    | 0.766783871 | 0.308 | 0.172 | 0.0032681  | 7 |
| Ikzf1    | 0.898335354 | 0.385 | 0.259 | 0.00337421 | 7 |
| Calm2    | 0.521698208 | 0.769 | 0.869 | 0.00351836 | 7 |
| Usmg5    | 0.454869324 | 0.667 | 0.722 | 0.00384164 | 7 |
| Dnajb1   | 0.997060995 | 0.41  | 0.296 | 0.0039081  | 7 |
| Selenok  | 0.348430683 | 0.769 | 0.833 | 0.00390991 | 7 |
| Atp11b   | 0.790635399 | 0.282 | 0.149 | 0.00392934 | 7 |
| Rps17    | 0.281243837 | 0.923 | 0.936 | 0.00394207 | 7 |
| Foxp1    | 0.758987442 | 0.487 | 0.423 | 0.00406405 | 7 |
| Srp9     | 0.559111299 | 0.641 | 0.695 | 0.00442703 | 7 |
| Topors   | 0.716651808 | 0.256 | 0.129 | 0.00450377 | 7 |
| Stk4     | 0.802126087 | 0.333 | 0.203 | 0.00455393 | 7 |
| Rpl15    | 0.253825747 | 0.949 | 0.932 | 0.00467433 | 7 |
| Ing2     | 0.831933905 | 0.308 | 0.177 | 0.00486723 | 7 |
| Snrpg    | 0.460377124 | 0.692 | 0.723 | 0.00496595 | 7 |
| Peli1    | 0.800857287 | 0.385 | 0.263 | 0.0051215  | 7 |
| Dnajc15  | 0.917871839 | 0.513 | 0.479 | 0.00512171 | 7 |
| Polr1d   | 0.444637336 | 0.641 | 0.698 | 0.00512978 | 7 |
| Fam107b  | 0.758165049 | 0.41  | 0.288 | 0.00514919 | 7 |
| Def6     | 0.702186621 | 0.333 | 0.208 | 0.00523906 | 7 |
| Hnrnpdl  | 0.877985775 | 0.487 | 0.442 | 0.00527004 | 7 |
| Abi3     | 0.772596934 | 0.385 | 0.267 | 0.00528545 | 7 |
| Atp5a1   | 0.57622652  | 0.667 | 0.768 | 0.00550113 | 7 |
| Smarcd2  | 0.932534063 | 0.385 | 0.281 | 0.00566489 | 7 |
| Ncor1    | 0.729440636 | 0.513 | 0.487 | 0.0060338  | 7 |
| Ppp1r15a | 0.599418337 | 0.564 | 0.543 | 0.00611055 | 7 |
| Rasgrp2  | 1.012396589 | 0.256 | 0.13  | 0.00616805 | 7 |
| Fkbp1a   | 0.532531998 | 0.615 | 0.659 | 0.00644051 | 7 |
| Vgll4    | 0.746358101 | 0.333 | 0.205 | 0.00651995 | 7 |
| Tspan13  | 0.675030383 | 0.462 | 0.347 | 0.00653797 | 7 |
| Celf2    | 0.962746129 | 0.538 | 0.543 | 0.00669457 | 7 |
| Emg1     | 0.86335954  | 0.513 | 0.517 | 0.00671836 | 7 |
| Npm1     | 0.3614872   | 0.769 | 0.797 | 0.00679564 | 7 |
| Ankrd11  | 0.704811969 | 0.538 | 0.521 | 0.00693591 | 7 |
| Atp5b    | 0.4408089   | 0.718 | 0.841 | 0.00702044 | 7 |
| Rbm38    | 0.555020667 | 0.256 | 0.132 | 0.00798975 | 7 |
| Tmsb10   | 0.492052868 | 0.821 | 0.774 | 0.00807371 | 7 |
| Tecpr1   | 0.886794647 | 0.282 | 0.163 | 0.00807454 | 7 |
| Rbm6     | 0.718489196 | 0.282 | 0.163 | 0.00817276 | 7 |
| Rpf1     | 0.743330569 | 0.333 | 0.217 | 0.00855296 | 7 |
| Psip1    | 0.747914705 | 0.256 | 0.139 | 0.00871841 | 7 |
| Hnrnpm   | 0.679394913 | 0.513 | 0.508 | 0.00902008 | 7 |
| Chchd2   | 0.340848019 | 0.897 | 0.894 | 0.0095251  | 7 |
| Ythdf1   | 0.63651554  | 0.308 | 0.189 | 0.00955288 | 7 |
| Acyp1    | 0.660323629 | 0.256 | 0.141 | 0.00956333 | 7 |



**Supplementary Table 2. Transcriptional response to SWNT-SHP1i in lesional macrophages, relative to SWNT-Cy5.5 control (Cluster 1).**

Cluster markers were identified using the non-parametric Wilcoxon rank sum test (n = 4 biologically independent animals per group).

| Gene     | log2 Fold Change | P value  | pct.1 | pct.2 |
|----------|------------------|----------|-------|-------|
| Acta2    | 1.265152964      | 1.24E-59 | 0.909 | 0.21  |
| Mgp      | 0.459018521      | 5.07E-25 | 0.996 | 1     |
| Tagln    | 0.753298678      | 1.33E-19 | 0.502 | 0.136 |
| Myh9     | 0.552016153      | 4.20E-18 | 0.474 | 0.121 |
| Tpm2     | 0.510457321      | 3.10E-17 | 0.446 | 0.107 |
| Spp1     | 0.417340773      | 1.38E-16 | 0.604 | 0.229 |
| Fau      | 0.254796871      | 1.46E-16 | 1     | 0.995 |
| Eef1a1   | 0.288009697      | 2.53E-14 | 1     | 1     |
| Hspb1    | 0.482242624      | 3.88E-14 | 0.4   | 0.103 |
| Rps15    | 0.286833643      | 6.87E-13 | 0.993 | 0.977 |
| Lgals1   | -0.428487287     | 8.19E-13 | 0.958 | 0.991 |
| Crip1    | -0.590857524     | 1.25E-12 | 0.93  | 0.986 |
| Cd36     | -0.479534984     | 3.34E-12 | 0.186 | 0.491 |
| Igfbp7   | 0.406678942      | 6.81E-12 | 0.891 | 0.785 |
| Ucp2     | 0.388976747      | 2.43E-11 | 0.944 | 0.893 |
| Ifi272a  | -0.763231471     | 2.84E-11 | 0.898 | 0.963 |
| Bin1     | -0.42898845      | 1.85E-10 | 0.544 | 0.785 |
| Ndufa4   | -0.404960776     | 2.61E-10 | 0.768 | 0.883 |
| Rpl30    | 0.262910032      | 3.58E-10 | 0.989 | 0.967 |
| Clu      | 0.413980296      | 4.58E-10 | 0.386 | 0.145 |
| Rgl1     | -0.335340932     | 5.02E-10 | 0.165 | 0.425 |
| Npl      | -0.539366078     | 6.00E-10 | 0.186 | 0.435 |
| Atp5k    | -0.3870932       | 1.13E-09 | 0.66  | 0.822 |
| Rps20    | 0.277814168      | 1.52E-09 | 0.989 | 0.972 |
| Retnla   | -1.168421472     | 4.24E-09 | 0.081 | 0.28  |
| Csrp2    | 0.318143302      | 4.86E-09 | 0.449 | 0.21  |
| Pf4      | -0.507081019     | 5.06E-09 | 0.807 | 0.921 |
| Ednrb    | -0.52050367      | 5.65E-09 | 0.077 | 0.266 |
| Cnn1     | 0.279474566      | 6.69E-09 | 0.182 | 0.019 |
| Snx2     | -0.415336689     | 6.73E-09 | 0.611 | 0.799 |
| Rnaset2a | -0.389801845     | 7.47E-09 | 0.565 | 0.818 |
| Fcna     | -0.826365094     | 1.03E-08 | 0.158 | 0.364 |
| Emp1     | -0.42812922      | 1.10E-08 | 0.361 | 0.607 |
| Dok2     | -0.393976103     | 1.78E-08 | 0.354 | 0.612 |
| Timd4    | -0.347192473     | 2.57E-08 | 0.06  | 0.234 |
| Folr2    | -0.560122249     | 2.73E-08 | 0.439 | 0.645 |
| Ccl7     | -0.597285864     | 3.71E-08 | 0.502 | 0.724 |
| Eif3f    | 0.269586077      | 3.72E-08 | 0.923 | 0.883 |
| Ltc4s    | -0.579856412     | 3.91E-08 | 0.435 | 0.636 |
| Ap2m1    | -0.361551132     | 4.19E-08 | 0.733 | 0.902 |
| Eno1     | -0.33124207      | 5.05E-08 | 0.621 | 0.808 |
| Rap1a    | -0.374988127     | 9.60E-08 | 0.681 | 0.832 |
| Mpeg1    | 0.42111853       | 1.58E-07 | 0.66  | 0.472 |
| Erh      | -0.298973465     | 1.58E-07 | 0.179 | 0.393 |
| Snx3     | -0.289155533     | 2.58E-07 | 0.839 | 0.949 |
| Fam213b  | -0.404177348     | 3.69E-07 | 0.249 | 0.458 |
| Fcgrt    | -0.46737877      | 3.72E-07 | 0.796 | 0.893 |
| Cstb     | -0.352959275     | 4.41E-07 | 0.818 | 0.911 |
| Pfn1     | -0.279597286     | 4.71E-07 | 0.996 | 1     |
| Romo1    | -0.311461868     | 5.87E-07 | 0.54  | 0.757 |
| Rgs1     | 0.642363468      | 6.34E-07 | 0.589 | 0.407 |
| Pdia3    | -0.264724614     | 6.90E-07 | 0.877 | 0.93  |
| Snx6     | -0.333671722     | 7.70E-07 | 0.512 | 0.724 |
| Ccl24    | -0.363795006     | 9.55E-07 | 0.207 | 0.411 |
| Lyve1    | -0.42600244      | 1.03E-06 | 0.253 | 0.467 |
| Peptd    | -0.394514693     | 1.20E-06 | 0.498 | 0.659 |
| Cd163    | -0.375362198     | 1.45E-06 | 0.182 | 0.383 |
| Dusp3    | -0.300437049     | 1.68E-06 | 0.291 | 0.509 |
| F13a1    | -0.551406091     | 2.01E-06 | 0.495 | 0.645 |
| Gas6     | -0.403648186     | 2.10E-06 | 0.663 | 0.813 |
| Trim47   | -0.350096468     | 2.37E-06 | 0.393 | 0.603 |
| C3       | 0.350908814      | 2.44E-06 | 0.389 | 0.22  |
| Cycs     | -0.280627523     | 3.76E-06 | 0.421 | 0.654 |
| Alox5    | -0.285724966     | 4.05E-06 | 0.214 | 0.407 |
| Jaml     | 0.256541987      | 4.45E-06 | 0.133 | 0.019 |
| Cbr2     | -0.413161454     | 4.70E-06 | 0.512 | 0.692 |
| Clec10a  | -0.444487706     | 4.71E-06 | 0.256 | 0.449 |
| Pdlim1   | -0.280702188     | 5.27E-06 | 0.168 | 0.35  |
| S100a13  | -0.326742005     | 5.32E-06 | 0.646 | 0.804 |
| Ndufa3   | -0.287046914     | 6.01E-06 | 0.723 | 0.804 |
| Fgfr1    | -0.272694806     | 6.20E-06 | 0.13  | 0.29  |
| Nisch    | 0.300341889      | 6.84E-06 | 0.709 | 0.556 |

|          |              |             |       |       |
|----------|--------------|-------------|-------|-------|
| Psm4     | -0.279602743 | 8.82E-06    | 0.593 | 0.771 |
| Manf     | -0.330700252 | 1.00E-05    | 0.688 | 0.808 |
| Ccl2     | -0.509657421 | 1.01E-05    | 0.691 | 0.813 |
| S100a10  | -0.301703773 | 1.13E-05    | 0.793 | 0.879 |
| Mfge8    | 0.330838367  | 1.28E-05    | 0.372 | 0.215 |
| Eps8     | -0.286386111 | 1.29E-05    | 0.337 | 0.528 |
| Cd209f   | -0.855827569 | 1.31E-05    | 0.067 | 0.192 |
| Gas7     | -0.27208706  | 1.32E-05    | 0.463 | 0.654 |
| Myl12a   | -0.252549817 | 1.34E-05    | 0.884 | 0.963 |
| Cd209g   | -0.419650897 | 1.34E-05    | 0.053 | 0.173 |
| Cox7a2l  | 0.255013872  | 1.40E-05    | 0.898 | 0.883 |
| Mt2      | 0.286952605  | 1.44E-05    | 0.86  | 0.729 |
| Fkbp5    | 0.33704007   | 1.82E-05    | 0.449 | 0.304 |
| Rgs2     | 0.335063253  | 1.86E-05    | 0.653 | 0.514 |
| Usmg5    | -0.323985805 | 1.87E-05    | 0.653 | 0.776 |
| Cd52     | 0.262394769  | 1.92E-05    | 0.874 | 0.729 |
| Cfh      | -0.257459094 | 1.99E-05    | 0.572 | 0.752 |
| Tslp     | -0.32029767  | 2.12E-05    | 0.098 | 0.243 |
| Fxyd2    | -0.32408326  | 2.24E-05    | 0.291 | 0.481 |
| Ifitm3   | -0.340298498 | 2.32E-05    | 0.909 | 0.958 |
| Timp2    | -0.313386265 | 3.83E-05    | 0.926 | 0.958 |
| Selenbp1 | -0.25089197  | 3.98E-05    | 0.274 | 0.453 |
| Polr2k   | -0.260597737 | 4.70E-05    | 0.428 | 0.645 |
| Ramp1    | 0.290376637  | 5.24E-05    | 0.288 | 0.14  |
| Tppp3    | -0.504746258 | 5.76E-05    | 0.214 | 0.374 |
| Vsig4    | -0.552757294 | 7.86E-05    | 0.056 | 0.164 |
| Cd74     | 0.481114409  | 8.47E-05    | 0.877 | 0.785 |
| Ifngr1   | 0.258547977  | 9.26E-05    | 0.881 | 0.841 |
| Ifitm6   | -0.275327141 | 9.52E-05    | 0.091 | 0.21  |
| Gatm     | -0.321523463 | 9.99E-05    | 0.407 | 0.598 |
| Tmem147  | -0.254748607 | 0.000114012 | 0.354 | 0.542 |
| Cfp      | -0.341959248 | 0.000134932 | 0.709 | 0.813 |
| Hgsnat   | -0.402645101 | 0.000151451 | 0.288 | 0.439 |
| Pros1    | -0.272127264 | 0.000200569 | 0.267 | 0.43  |
| Cd300c2  | 0.265584857  | 0.000215326 | 0.709 | 0.593 |
| Ccl6     | -0.638146279 | 0.000217453 | 0.772 | 0.883 |
| Tmem256  | -0.259323005 | 0.000255849 | 0.705 | 0.832 |
| Serpnb6a | -0.313895502 | 0.00028179  | 0.681 | 0.804 |
| Gmfg     | -0.257308706 | 0.000324405 | 0.804 | 0.893 |
| Xlr      | -0.250515701 | 0.000447415 | 0.077 | 0.182 |
| Cd69     | 0.277436576  | 0.000557059 | 0.102 | 0.023 |
| Rpf1     | 0.259104159  | 0.000619865 | 0.26  | 0.145 |
| Lpcat2   | 0.252576146  | 0.000679242 | 0.523 | 0.393 |
| Pi16     | -0.319615705 | 0.000728676 | 0.375 | 0.547 |
| C4b      | -0.372158757 | 0.000768452 | 0.368 | 0.5   |
| Ccl8     | -0.821591152 | 0.000800435 | 0.323 | 0.453 |
| Igsf6    | 0.26184576   | 0.000980792 | 0.484 | 0.383 |
| Anxa2    | -0.27835436  | 0.001068155 | 0.684 | 0.743 |
| Sod3     | 0.263970329  | 0.001078514 | 0.316 | 0.21  |
| H2-Aa    | 0.519853719  | 0.001250177 | 0.554 | 0.439 |
| Tgfb1    | 0.300661088  | 0.001481815 | 0.386 | 0.271 |
| Fcgr4    | 0.360474341  | 0.001595442 | 0.411 | 0.304 |
| S100a6   | -0.285174482 | 0.001626434 | 0.849 | 0.902 |
| Nsa2     | 0.260436488  | 0.001902764 | 0.509 | 0.449 |
| H2-Ab1   | 0.431596943  | 0.001958187 | 0.649 | 0.561 |
| Actb     | -0.313482748 | 0.001988336 | 0.996 | 1     |
| Zfp36    | 0.264597507  | 0.002141865 | 0.891 | 0.855 |
| Sgk1     | 0.439967947  | 0.002431366 | 0.425 | 0.341 |
| Mpp1     | -0.259811428 | 0.002524474 | 0.509 | 0.589 |
| Wfdc17   | -0.645606271 | 0.00252928  | 0.881 | 0.883 |
| Pmp22    | -0.260922983 | 0.003829081 | 0.635 | 0.734 |
| Zmynd15  | 0.292398799  | 0.004098366 | 0.214 | 0.121 |
| Cd9      | 0.283008433  | 0.004764828 | 0.582 | 0.486 |
| H2-Eb1   | 0.477652984  | 0.00557242  | 0.505 | 0.421 |
| AA467197 | 0.359055243  | 0.005581539 | 0.242 | 0.14  |
| Glipr1   | 0.325030349  | 0.006283802 | 0.509 | 0.402 |
| Gadd45b  | 0.340564586  | 0.008447609 | 0.442 | 0.369 |
| Ccl12    | -0.255224849 | 0.010698404 | 0.54  | 0.664 |
| H2-DMa   | 0.259179246  | 0.011579529 | 0.66  | 0.607 |
| Plac8    | -0.26769656  | 0.013950563 | 0.06  | 0.121 |
| Rcn3     | -0.250987714 | 0.021168616 | 0.393 | 0.477 |
| Clec4n   | 0.301439559  | 0.024884113 | 0.491 | 0.435 |
| Socs3    | 0.344478064  | 0.025698788 | 0.765 | 0.743 |
| Clec4d   | 0.278825536  | 0.029345348 | 0.267 | 0.206 |
| Ccl3     | 0.253884552  | 0.030944622 | 0.642 | 0.589 |

**Supplementary Table 3. Enriched functions in SWNT-SHP11-treated lesional macrophages identified by Ingenuity Pathway Analysis. Note the lack of a predicted increase in signaling related to cell death or apoptosis of leukocytes, indicating that chronic blockade of the CD47-SIRP $\alpha$  axis does not induce maladaptive changes in the lesional macrophage.**

Functional enrichment was assessed using two-sided Fisher's exact test (n = 4 biologically independent animals per group).

| Categories                                                                                                                                                       | Diseases or Functions Annotation           | P value  | Predicted Activation | z-score | Molecules         | # Molecules |
|------------------------------------------------------------------------------------------------------------------------------------------------------------------|--------------------------------------------|----------|----------------------|---------|-------------------|-------------|
| Cellular Movement,Immune Cell Trafficking                                                                                                                        | Leukocyte migration                        | 5.91E-22 |                      | -1.986  | ACTB,ALOX5,ANX    | 48          |
| Connective Tissue Disorders,Inflammatory Disease,Inflammatory Response,Organismal Injury and Abnormalities,Skeletal and Muscular Disorders                       | Inflammation of joint                      | 2.22E-18 |                      | -1.061  | ACTA2,ALOX5,C3,   | 45          |
| Connective Tissue Disorders,Inflammatory Disease,Organismal Injury and Abnormalities,Skeletal and Muscular Disorders                                             | Rheumatic Disease                          | 7.15E-18 |                      | -0.989  | ACTA2,ALOX5,C3,   | 49          |
| Cellular Movement,Hematological System Development and Function,Immune Cell Trafficking                                                                          | Cell movement of leukocytes                | 1.29E-17 |                      | -1.618  | ACTB,ALOX5,ANX    | 39          |
| Immunological Disease                                                                                                                                            | Systemic autoimmune syndrome               | 1.33E-17 |                      | 0       | ACTA2,ALOX5,C3,   | 49          |
| Cellular Movement                                                                                                                                                | Cell movement                              | 2.78E-16 | Decreased            | -3.113  | ACTA2,ACTB,ALO    | 65          |
| Hematological System Development and Function,Tissue Morphology                                                                                                  | Quantity of blood cells                    | 7.82E-16 |                      | 0.254   | ALOX5,C3,C4A/C4   | 42          |
| Cellular Movement                                                                                                                                                | Migration of cells                         | 1.53E-15 | Decreased            | -2.898  | ACTA2,ACTB,ALO    | 60          |
| Cellular Movement,Hematological System Development and Function,Immune Cell Trafficking,Inflammatory Response                                                    | Cell movement of phagocytes                | 1.64E-15 |                      | -1.462  | ALOX5,ANXA2,C3,   | 31          |
| Hematological System Development and Function,Tissue Morphology                                                                                                  | Quantity of leukocytes                     | 2.29E-15 |                      | -0.083  | ALOX5,C3,C4A/C4   | 39          |
| Connective Tissue Disorders,Immunological Disease,Inflammatory Disease,Inflammatory Response,Organismal Injury and Abnormalities,Skeletal and Muscular Disorders | Rheumatoid arthritis                       | 3.57E-15 |                      |         | ACTA2,ALOX5,C3,   | 35          |
| Connective Tissue Disorders,Organismal Injury and Abnormalities,Skeletal and Muscular Disorders                                                                  | Non-traumatic arthropathy                  | 6.44E-15 |                      |         | ACTA2,ALOX5,C3,   | 37          |
| Cellular Movement                                                                                                                                                | Cell movement of myeloid cells             | 8.94E-15 |                      | -1.143  | ALOX5,ANXA2,C3,   | 30          |
| Tissue Morphology                                                                                                                                                | Quantity of cells                          | 2.01E-14 |                      | -0.307  | ALOX5,C3,C4A/C4   | 54          |
| Cell-To-Cell Signaling and Interaction                                                                                                                           | Adhesion of blood cells                    | 3.81E-14 |                      | -0.455  | C3,C4A/C4B,CCL2,  | 24          |
| Function                                                                                                                                                         | Binding of leukocytes                      | 4.32E-14 |                      | -0.158  | C3,CCL2,Ccl2,CCL3 | 24          |
| Inflammatory Response,Organismal Injury and Abnormalities                                                                                                        | Inflammation of organ                      | 5.56E-14 |                      | 0.179   | ACTA2,ACTB,ALO    | 46          |
| Hematological System Development and Function,Tissue Morphology                                                                                                  | Quantity of myeloid cells                  | 6.04E-14 |                      | -0.587  | ALOX5,C3,C4A/C4   | 27          |
| Cell-To-Cell Signaling and Interaction,Hematological System Development and Function,Immune Cell Trafficking                                                     | Adhesion of immune cells                   | 6.09E-14 |                      | -0.078  | C3,CCL2,Ccl2,CCL3 | 23          |
| Cell-To-Cell Signaling and Interaction                                                                                                                           | Binding of blood cells                     | 7.53E-14 |                      | -0.532  | C3,C4A/C4B,CCL2,  | 25          |
| Cellular Function and Maintenance                                                                                                                                | Function of antigen presenting cells       | 8.23E-14 |                      |         | CCL2,Ccl2,CD36,C  | 19          |
| Cell-To-Cell Signaling and Interaction,Cellular Movement,Hematological System Development and Function,Immune Cell Trafficking                                   | Recruitment of leukocytes                  | 1.12E-13 |                      | -1.597  | ALOX5,C3,C4A/C4   | 22          |
| Cell-To-Cell Signaling and Interaction,Cellular Movement                                                                                                         | Recruitment of cells                       | 1.28E-13 |                      | -1.808  | ALOX5,C3,C4A/C4   | 23          |
| Cellular Movement                                                                                                                                                | Chemotaxis                                 | 1.89E-13 |                      | -0.321  | ALOX5,ANXA2,C3,   | 28          |
| Inflammatory Disease                                                                                                                                             | Chronic inflammatory disorder              | 2.44E-13 |                      |         | ACTA2,ALOX5,C3,   | 40          |
| Cellular Compromise,Inflammatory Response                                                                                                                        | Degranulation of cells                     | 4.97E-13 |                      | 0.275   | ALOX5,ANXA2,C3,   | 28          |
| Inflammatory Response                                                                                                                                            | Inflammatory response                      | 5.50E-13 | Decreased            | -2.277  | ALOX5,ANXA2,C3,   | 33          |
| Endocrine System Disorders,Gastrointestinal Disease,Metabolic Disease,Organismal Injury and Abnormalities                                                        | Diabetes mellitus                          | 7.58E-13 |                      | 0.692   | ACTA2,ANXA2,C3,   | 39          |
| Cellular Movement                                                                                                                                                | Cellular infiltration                      | 7.63E-13 |                      | -0.712  | ACTB,C3,C4A/C4B   | 25          |
| Hematological System Development and Function,Tissue Morphology                                                                                                  | Quantity of granulocytes                   | 9.97E-13 |                      | -0.121  | ALOX5,C3,C4A/C4   | 21          |
| Inflammatory Response                                                                                                                                            | Inflammation of absolute anatomical region | 1.32E-12 |                      | -0.351  | ACTA2,ACTB,ALO    | 38          |
| Cellular Function and Maintenance                                                                                                                                | Function of blood cells                    | 1.50E-12 |                      |         | C3,CCL2,Ccl2,CD3  | 26          |
| Cellular Movement,Hematological System Development and Function,Immune Cell Trafficking,Inflammatory Response                                                    | Cell movement of neutrophils               | 3.43E-12 |                      | -0.772  | ALOX5,C3,C4A/C4   | 20          |
| Cellular Function and Maintenance                                                                                                                                | Function of leukocytes                     | 5.83E-12 |                      |         | C3,CCL2,Ccl2,CD3  | 24          |
| Immunological Disease                                                                                                                                            | Hypersensitive reaction                    | 6.26E-12 |                      | 0.954   | ALOX5,C3,CCL2,C   | 23          |
| Cellular Function and Maintenance                                                                                                                                | Function of phagocytes                     | 6.66E-12 |                      |         | C3,CCL2,Ccl2,CD3  | 18          |
| Inflammatory Response                                                                                                                                            | Inflammation of body cavity                | 7.61E-12 |                      | -0.699  | ACTA2,ACTB,ALO    | 33          |
| Hematological System Development and Function,Inflammatory Response,Tissue Morphology                                                                            | Quantity of phagocytes                     | 8.78E-12 |                      | 0.95    | C3,C4A/C4B,CCL2,  | 23          |
| Cell Death and Survival                                                                                                                                          | Apoptosis                                  | 1.11E-11 |                      | -0.336  | 3830403N18Rik/X   | 62          |
| Endocrine System Disorders,Gastrointestinal Disease,Immunological Disease,Metabolic Disease,Organismal Injury and Abnormalities                                  | Insulin-dependent diabetes mellitus        | 1.49E-11 |                      |         | ACTA2,CCL2,Ccl2,  | 23          |
| Cell Death and Survival                                                                                                                                          | Necrosis                                   | 1.60E-11 |                      | 0.987   | 3830403N18Rik/X   | 62          |
| Cellular Movement,Hematological System Development and Function,Immune Cell Trafficking                                                                          | Cell movement of granulocytes              | 2.58E-11 |                      | -0.914  | ALOX5,C3,C4A/C4   | 21          |
| Dermatological Diseases and Conditions,Organismal Injury and Abnormalities                                                                                       | Psoriasis                                  | 4.13E-11 |                      |         | ACTA2,ANXA2,C3,   | 25          |
| Cellular Movement,Immune Cell Trafficking                                                                                                                        | Cell movement of lymphatic system cells    | 4.90E-11 |                      | 0.267   | ACTB,ALOX5,C3,C   | 22          |

|                                                                                                                                                      |                                           |          |           |        |                   |    |
|------------------------------------------------------------------------------------------------------------------------------------------------------|-------------------------------------------|----------|-----------|--------|-------------------|----|
| Cell-To-Cell Signaling and Interaction,Inflammatory Response                                                                                         | Immune response of leukocytes             | 4.90E-11 |           | -1.018 | BIN1,C3,CCL2,Ccl2 | 19 |
| Metabolic Disease                                                                                                                                    | Glucose metabolism disorder               | 7.85E-11 |           | 0.687  | ACTA2,ANXA2,C3    | 40 |
| Cellular Function and Maintenance,Hematological System Development and Function                                                                      | Function of macrophages                   | 8.50E-11 |           |        | CCL2,Ccl2,CD36,C  | 14 |
| Inflammatory Response                                                                                                                                | Immune response of cells                  | 1.13E-10 |           | -1.201 | BIN1,C3,CCL2,Ccl2 | 25 |
| Cellular Movement,Hematological System Development and Function,Immune Cell Trafficking                                                              | Cellular infiltration by leukocytes       | 1.46E-10 |           | -0.743 | C3,C4A/C4B,CCL2   | 21 |
| Immunological Disease                                                                                                                                | Allergy                                   | 1.66E-10 |           | -0.555 | ACTB,ALOX5,C3,C   | 21 |
| Cellular Compromise,Inflammatory Response                                                                                                            | Degranulation of phagocytes               | 1.80E-10 |           | -0.391 | ALOX5,ANXA2,C3    | 22 |
| Neurological Disease                                                                                                                                 | Progressive neurological disorder         | 1.97E-10 |           |        | ACTB,ALOX5,ANX    | 26 |
| Infectious Diseases                                                                                                                                  | Viral Infection                           | 2.22E-10 |           | -0.897 | ACTA2,ACTB,ALO    | 43 |
| Cell-To-Cell Signaling and Interaction,Cellular Movement                                                                                             | Recruitment of myeloid cells              | 2.49E-10 |           | -1.248 | ALOX5,C3,CCL2,C   | 17 |
| Hematological System Development and Function,Tissue Development                                                                                     | Accumulation of myeloid cells             | 2.73E-10 |           | -1.192 | ALOX5,C3,CCL2,C   | 14 |
| Cardiovascular System Development and Function,Tissue Morphology                                                                                     | Permeability of blood vessel              | 3.65E-10 |           | 1.643  | ACTA2,C3,C4A/C4   | 11 |
| Cellular Movement,Hematological System Development and Function,Immune Cell Trafficking,Inflammatory Response                                        | Chemotaxis of leukocytes                  | 4.39E-10 |           | -0.965 | ALOX5,C3,CCL2,C   | 19 |
| Hematological System Development and Function,Tissue Morphology                                                                                      | Quantity of mononuclear leukocytes        | 4.80E-10 |           | -0.568 | C3,CCL2,Ccl2,Ccl7 | 28 |
| Cellular Movement,Hematological System Development and Function,Immune Cell Trafficking                                                              | Cell movement of mononuclear leukocytes   | 5.20E-10 |           | -0.367 | ACTB,ALOX5,ANX    | 22 |
| Cellular Movement                                                                                                                                    | Chemotaxis of myeloid cells               | 5.24E-10 |           | -0.665 | ALOX5,C3,CCL2,C   | 17 |
| Cellular Movement,Hematological System Development and Function,Immune Cell Trafficking                                                              | Cell movement of lymphocytes              | 8.06E-10 |           | 0.338  | ACTB,ALOX5,C3,C   | 20 |
| Cellular Movement,Hematological System Development and Function,Immune Cell Trafficking,Inflammatory Response                                        | Cell movement of dendritic cells          | 8.08E-10 |           | -0.788 | C3,CCL2,Ccl2,CCL2 | 13 |
| Cellular Movement,Hematological System Development and Function,Immune Cell Trafficking,Inflammatory Response                                        | Chemotaxis of phagocytes                  | 8.74E-10 |           | -0.938 | ALOX5,C3,CCL2,C   | 17 |
| Lymphoid Tissue Structure and Development,Tissue Morphology                                                                                          | Quantity of lymphatic system cells        | 1.14E-09 |           | -0.229 | C3,CCL2,Ccl2,CD3  | 28 |
| Neurological Disease                                                                                                                                 | Progressive motor neuropathy              | 1.18E-09 |           |        | ACTB,ALOX5,ANX    | 23 |
| Cancer,Organismal Injury and Abnormalities,Reproductive System Disease                                                                               | Prostatic intraepithelial tumor           | 1.21E-09 |           |        | ANXA2,C3,CD74,C   | 11 |
| Hematological System Development and Function,Inflammatory Response,Tissue Morphology                                                                | Quantity of neutrophils                   | 1.53E-09 |           | 1.175  | C3,C4A/C4B,CCL2   | 15 |
| Tissue Development                                                                                                                                   | Growth of epithelial tissue               | 2.22E-09 |           | -0.705 | C3,CCL2,Ccl2,CCL2 | 26 |
| Cellular Function and Maintenance                                                                                                                    | Endocytosis by eukaryotic cells           | 2.47E-09 |           | -0.45  | AP2M1,BIN1,C3,C   | 17 |
| Cellular Development,Cellular Growth and Proliferation                                                                                               | Proliferation of blood cells              | 2.59E-09 |           | 0.563  | C3,CCL2,Ccl2,CCL2 | 29 |
| Cellular Movement                                                                                                                                    | Cellular infiltration by myeloid cells    | 3.06E-09 |           | -0.838 | C3,C4A/C4B,CCL2   | 17 |
| Cardiovascular Disease                                                                                                                               | Vascular lesion                           | 3.08E-09 |           |        | ACTA2,ALOX5,CCL   | 15 |
| Cellular Movement,Hematological System Development and Function,Immune Cell Trafficking,Inflammatory Response                                        | Cellular infiltration by phagocytes       | 3.85E-09 |           | -0.655 | C3,C4A/C4B,CCL2   | 16 |
| Cellular Movement,Hematological System Development and Function,Immune Cell Trafficking,Inflammatory Response                                        | Chemotaxis of granulocytes                | 3.93E-09 |           | -0.47  | ALOX5,C3,CCL2,C   | 13 |
| Cellular Function and Maintenance                                                                                                                    | Engulfment of cells                       | 4.08E-09 |           | -0.522 | AP2M1,BIN1,C3,C   | 20 |
| Cell-To-Cell Signaling and Interaction,Cellular Movement,Hematological System Development and Function,Immune Cell Trafficking,Inflammatory Response | Recruitment of phagocytes                 | 4.30E-09 |           | -1.48  | ALOX5,CCL2,Ccl2,  | 15 |
| Hematological System Development and Function,Lymphoid Tissue Structure and Development,Tissue Morphology                                            | Quantity of lymphocytes                   | 4.31E-09 |           | -0.512 | C3,CCL2,Ccl2,CD3  | 26 |
| Cellular Compromise,Inflammatory Response                                                                                                            | Degranulation of neutrophils              | 4.49E-09 |           |        | ALOX5,ANXA2,C3    | 18 |
| Inflammatory Disease,Inflammatory Response,Organismal Injury and Abnormalities,Respiratory Disease                                                   | Inflammation of lung                      | 4.69E-09 |           | -1.29  | ACTB,C3,CCL2,Ccl  | 19 |
| Cellular Function and Maintenance                                                                                                                    | Endocytosis                               | 4.99E-09 |           | -0.618 | ACTB,AP2M1,BIN    | 22 |
| Cellular Movement,Hematological System Development and Function,Immune Cell Trafficking                                                              | Cell movement of antigen presenting cells | 5.25E-09 |           | -0.907 | C3,CCL2,Ccl2,CCL2 | 18 |
| Cellular Movement,Hematological System Development and Function,Immune Cell Trafficking,Inflammatory Response                                        | Chemotaxis of neutrophils                 | 6.53E-09 |           | -0.849 | ALOX5,C3,CCL2,C   | 12 |
| Inflammatory Response,Respiratory Disease                                                                                                            | Inflammation of respiratory system        | 7.16E-09 |           | -0.945 | ACTB,C3,CCL2,Ccl  | 20 |
| Cellular Movement,Immune Cell Trafficking                                                                                                            | Migration of lymphatic system cells       | 7.35E-09 |           | 0.394  | ACTB,ALOX5,C3,C   | 18 |
| Cellular Movement                                                                                                                                    | Cell movement of tumor cell lines         | 8.54E-09 | Decreased | -3.011 | ACTA2,ANXA2,AP    | 31 |
| Hematological System Development and Function,Immune Cell Trafficking,Inflammatory Response,Tissue Development                                       | Accumulation of leukocytes                | 9.91E-09 |           | -0.743 | ALOX5,C3,C4A/C4   | 15 |
| Cellular Movement,Hematological System Development and Function,Immune Cell Trafficking                                                              | Migration of mononuclear leukocytes       | 1.02E-08 |           | 0.307  | ACTB,ALOX5,ANX    | 18 |
| Cell-mediated Immune Response,Cellular Movement,Hematological System Development and Function,Immune Cell Trafficking                                | T cell migration                          | 1.15E-08 |           | 0.592  | ACTB,ALOX5,C3,C   | 15 |

|                                                                                                                                                                                   |                                         |          |  |        |                   |    |
|-----------------------------------------------------------------------------------------------------------------------------------------------------------------------------------|-----------------------------------------|----------|--|--------|-------------------|----|
| Inflammatory Disease,Inflammatory Response,Organismal Injury and Abnormalities,Renal and Urological Disease                                                                       | Nephritis                               | 1.63E-08 |  | 0.163  | ALOX5,C3,C4A/C4   | 17 |
| Cardiovascular System Development and Function                                                                                                                                    | Development of vasculature              | 1.73E-08 |  | -0.071 | ACTA2,ANXA2,C3    | 32 |
| Abnormalities                                                                                                                                                                     | Celiac disease                          | 1.86E-08 |  |        | ALOX5,HLA-DQA1    | 6  |
| Inflammatory Response,Neurological Disease                                                                                                                                        | Inflammation of central nervous system  | 1.86E-08 |  | 0.45   | ALOX5,C3,C4A/C4   | 18 |
| Cellular Movement,Hematological System Development and Function,Immune Cell Trafficking                                                                                           | Lymphocyte migration                    | 2.14E-08 |  | 0.657  | ACTB,ALOX5,C3,C   | 17 |
| Infectious Diseases                                                                                                                                                               | Infection of mammalia                   | 2.44E-08 |  | -0.206 | C3,C4A/C4B,Ccl2,  | 16 |
| Cancer,Organismal Injury and Abnormalities                                                                                                                                        | Advanced malignant tumor                | 2.52E-08 |  | 0.522  | ACTA2,ACTB,ALO    | 31 |
| Cardiovascular Disease,Organismal Injury and Abnormalities                                                                                                                        | Arteriosclerosis                        | 2.63E-08 |  | -0.784 | ACTA2,ALOX5,CCL   | 20 |
| Organismal Injury and Abnormalities,Respiratory Disease                                                                                                                           | Damage of lung                          | 2.66E-08 |  | -1.268 | ANXA2,C3,CCL2,C   | 13 |
| Humoral Immune Response,Protein Synthesis                                                                                                                                         | Quantity of immunoglobulin              | 2.67E-08 |  | 0.195  | C4A/C4B,Ccl2,CD3  | 15 |
| Dermatological Diseases and Conditions,Immunological Disease,Inflammatory Disease,Organismal Injury and Abnormalities                                                             | Lichen planus                           | 2.75E-08 |  |        | CCL2,CD74,EEF1A   | 9  |
| Cell-To-Cell Signaling and Interaction,Cellular Movement,Hematological System Development and Function,Immune Cell Trafficking                                                    | Recruitment of granulocytes             | 2.91E-08 |  | 0      | ALOX5,C3,CCL2,Cc  | 13 |
| Inflammatory Disease,Inflammatory Response,Organismal Injury and Abnormalities,Renal and Urological Disease                                                                       | Glomerulonephritis                      | 3.29E-08 |  | 0.081  | ALOX5,C3,C4A/C4   | 15 |
| Inflammatory Disease,Inflammatory Response,Neurological Disease,Organismal Injury and Abnormalities                                                                               | Encephalitis                            | 3.32E-08 |  | 0.696  | ALOX5,C3,C4A/C4   | 17 |
| Cellular Growth and Proliferation,Lymphoid Tissue Structure and Development                                                                                                       | Proliferation of lymphatic system cells | 3.50E-08 |  | 0.671  | C3,CCL2,Ccl2,CD3  | 26 |
| Cellular Development,Cellular Growth and Proliferation,Hematological System Development and Function,Lymphoid Tissue Structure and Development                                    | Cell proliferation of T lymphocytes     | 3.68E-08 |  | 0.415  | C3,CCL2,Ccl2,CD3  | 22 |
| Tissue Development                                                                                                                                                                | Accumulation of cells                   | 3.80E-08 |  | -1.009 | ALOX5,C3,C4A/C4   | 16 |
| Cancer,Hematological Disease,Immunological Disease,Organismal Injury and Abnormalities                                                                                            | Plasma cell neoplasm                    | 4.49E-08 |  |        | Ccl2,CCL24,Ccl6,C | 9  |
| Cardiovascular System Development and Function,Cellular Development,Cellular Function and Maintenance,Cellular Growth and Proliferation,Organismal Development,Tissue Development | Endothelial cell development            | 4.67E-08 |  | 0.084  | ANXA2,C3,CCL2,C   | 17 |
| Cellular Movement,Hematological System Development and Function,Immune Cell Trafficking                                                                                           | Cellular infiltration by granulocytes   | 5.92E-08 |  | -0.586 | C3,C4A/C4B,Ccl2,  | 13 |
| Cell-To-Cell Signaling and Interaction,Cellular Function and Maintenance,Inflammatory Response                                                                                    | Phagocytosis of phagocytes              | 5.95E-08 |  | -0.019 | BIN1,C3,CD36,CFH  | 11 |
| Cell-To-Cell Signaling and Interaction,Cellular Function and Maintenance,Hematological System Development and Function                                                            | Phagocytosis of myeloid cells           | 6.28E-08 |  | -0.198 | BIN1,C3,CD36,CFH  | 11 |
| Endocrine System Disorders,Gastrointestinal Disease,Metabolic Disease,Organismal Injury and Abnormalities                                                                         | Experimentally-induced diabetes         | 7.13E-08 |  |        | ANXA2,C3,CD74,F   | 9  |
| Cell-To-Cell Signaling and Interaction                                                                                                                                            | Response of myeloid cells               | 7.22E-08 |  | -0.855 | BIN1,C3,CCL2,CD3  | 13 |
| Cell-To-Cell Signaling and Interaction,Inflammatory Response                                                                                                                      | Response of phagocytes                  | 8.45E-08 |  | -0.736 | BIN1,C3,CCL2,CD3  | 13 |
| Cellular Development,Cellular Growth and Proliferation,Hematological System Development and Function,Lymphoid Tissue Structure and Development                                    | Proliferation of lymphocytes            | 1.03E-07 |  | 0.602  | C3,CCL2,Ccl2,CD3  | 24 |
| Cardiovascular Disease,Organismal Injury and Abnormalities                                                                                                                        | Atherosclerosis                         | 1.12E-07 |  | -0.784 | ACTA2,ALOX5,CCL   | 19 |
| Cellular Movement,Hematological System Development and Function,Immune Cell Trafficking,Inflammatory Response                                                                     | Migration of phagocytes                 | 1.25E-07 |  | -1.069 | ANXA2,C3,CCL2,C   | 14 |
| Cell-mediated Immune Response,Cellular Movement,Hematological System Development and Function,Immune Cell Trafficking                                                             | Cell movement of T lymphocytes          | 1.34E-07 |  | 1.063  | C3,CCL2,Ccl2,CCL2 | 13 |
| Gastrointestinal Disease,Immunological Disease,Ophthalmic Disease,Organismal Injury and Abnormalities                                                                             | Sjögren syndrome                        | 1.36E-07 |  |        | ACTB,C3,Ccl2,CCL  | 9  |
| Cancer,Organismal Injury and Abnormalities                                                                                                                                        | Secondary tumor                         | 1.46E-07 |  | 0.522  | ACTA2,ACTB,ALO    | 28 |
| Hematological System Development and Function,Immune Cell Trafficking,Inflammatory Response,Tissue Development                                                                    | Accumulation of granulocytes            | 1.56E-07 |  | -0.651 | ALOX5,CCL2,Ccl2,  | 9  |
| Cellular Function and Maintenance,Inflammatory Response                                                                                                                           | Phagocytosis                            | 1.78E-07 |  | -0.272 | BIN1,C3,Ccl2,CD3  | 15 |
| Cell-To-Cell Signaling and Interaction                                                                                                                                            | Binding of myeloid cells                | 1.89E-07 |  | -0.767 | C3,CCL2,CD69,CFH  | 12 |
| Cellular Compromise,Inflammatory Response                                                                                                                                         | Degranulation of blood platelets        | 1.91E-07 |  |        | CD36,CD9,CLU,F1   | 9  |
| Cellular Movement,Hematological System Development and Function,Immune Cell Trafficking                                                                                           | Migration of antigen presenting cells   | 1.95E-07 |  | -0.954 | C3,CCL2,Ccl2,CCL3 | 11 |
| Connective Tissue Disorders,Inflammatory Disease,Inflammatory Response,Organismal Injury and Abnormalities,Skeletal and Muscular Disorders                                        | Polyarthritis                           | 2.14E-07 |  | -0.514 | CD69,CD74,F13A1   | 11 |
| Cellular Movement,Hematological System Development and Function,Immune Cell Trafficking,Inflammatory Response                                                                     | Migration of dendritic cells            | 2.17E-07 |  | -0.402 | C3,CCL2,CCL3L3,C  | 9  |
| Cell-To-Cell Signaling and Interaction,Inflammatory Response                                                                                                                      | Immune response of phagocytes           | 2.31E-07 |  | -0.497 | BIN1,C3,CCL2,CD3  | 12 |

|                                                                                                                                                                                   |                                        |          |           |        |                      |    |
|-----------------------------------------------------------------------------------------------------------------------------------------------------------------------------------|----------------------------------------|----------|-----------|--------|----------------------|----|
| Cellular Movement,Hematological System Development and Function,Immune Cell Trafficking,Inflammatory Response                                                                     | Infiltration by neutrophils            | 2.35E-07 |           | -0.182 | C3,C4A/C4B,CD36      | 11 |
| Cell-To-Cell Signaling and Interaction                                                                                                                                            | Activation of cells                    | 2.37E-07 |           | -0.867 | ANXA2,C3,C4A/C4      | 28 |
| Cardiovascular System Development and Function,Cellular Development,Cellular Function and Maintenance,Cellular Growth and Proliferation,Organismal Development,Tissue Development | Proliferation of endothelial cells     | 2.38E-07 |           | -0.266 | C3,CCL2,Ccl2,CCL2    | 15 |
| Cardiovascular Disease,Organismal Injury and Abnormalities                                                                                                                        | Vaso-occlusion                         | 2.43E-07 |           | -0.784 | ACTA2,ALOX5,CCL2     | 20 |
| Cell-To-Cell Signaling and Interaction,Cellular Function and Maintenance,Inflammatory Response                                                                                    | Phagocytosis of cells                  | 2.47E-07 |           | -0.071 | BIN1,C3,CD36,CFH     | 14 |
| Metabolic Disease                                                                                                                                                                 | Amyloidosis                            | 2.63E-07 |           |        | ACTA2,ACTB,BIN1      | 21 |
| Inflammatory Disease,Respiratory Disease                                                                                                                                          | Airway hyperresponsiveness             | 2.99E-07 |           | -0.216 | ALOX5,C3,CCL2,CCL2   | 9  |
| Cell-To-Cell Signaling and Interaction,Hematological System Development and Function                                                                                              | Activation of myeloid cells            | 2.99E-07 |           | -1.025 | ANXA2,C3,C4A/C4      | 15 |
| Cell Death and Survival                                                                                                                                                           | Cell survival                          | 3.30E-07 |           | 0.809  | ATP5MD,C3,CCL2       | 36 |
| Hematological System Development and Function,Immune Cell Trafficking,Inflammatory Response,Tissue Development                                                                    | Accumulation of phagocytes             | 3.41E-07 |           | -1.229 | C3,CCL2,Ccl2,FCG     | 10 |
| Infectious Diseases                                                                                                                                                               | Sepsis                                 | 3.50E-07 |           | -0.447 | C3,C4A/C4B,CCL3      | 11 |
| Cell-To-Cell Signaling and Interaction,Hematological System Development and Function,Immune Cell Trafficking,Inflammatory Response                                                | Activation of leukocytes               | 3.59E-07 |           | -0.257 | ANXA2,C3,C4A/C4      | 22 |
| Organismal Injury and Abnormalities                                                                                                                                               | Fibrosis                               | 3.68E-07 | Decreased | -3.047 | ALOX5,C3,CCL2,CCL2   | 20 |
| Immunological Disease,Inflammatory Response                                                                                                                                       | Abnormal function of immune system     | 3.86E-07 |           |        | ALOX5,C3,C4A/C4      | 8  |
| Hematological Disease,Immunological Disease,Inflammatory Disease                                                                                                                  | Eosinophilic inflammation              | 4.56E-07 |           |        | ACTB,CCL24,CCL3      | 9  |
| Cardiovascular System Development and Function,Organismal Development                                                                                                             | Vasculogenesis                         | 4.66E-07 |           | -0.409 | ANXA2,C3,CCL2,CCL2   | 24 |
| Metabolic Disease,Neurological Disease,Organismal Injury and Abnormalities,Psychological Disorders                                                                                | Alzheimer disease                      | 4.72E-07 |           |        | ACTA2,ACTB,BIN1      | 20 |
| Organismal Injury and Abnormalities                                                                                                                                               | Blood clot                             | 4.77E-07 |           | -0.038 | ANXA2,C3,CD36,CCL2   | 12 |
| Inflammatory Disease,Respiratory Disease                                                                                                                                          | Asthma                                 | 5.52E-07 |           |        | ACTA2,ALOX5,C3       | 12 |
| Hereditary Disorder,Neurological Disease,Organismal Injury and Abnormalities,Psychological Disorders                                                                              | Unverricht-Lundborg syndrome           | 5.58E-07 |           |        | C3,C4A/C4B,CSTB      | 4  |
| Cardiovascular System Development and Function,Organismal Development                                                                                                             | Angiogenesis                           | 5.64E-07 |           | -0.071 | ANXA2,C3,CCL2,CCL2   | 27 |
| Function                                                                                                                                                                          | Activation of blood cells              | 5.64E-07 |           | -0.405 | ANXA2,C3,C4A/C4      | 23 |
| Dermatological Diseases and Conditions,Organismal Injury and Abnormalities                                                                                                        | Chronic skin disorder                  | 6.75E-07 |           |        | C3,C4A/C4B,CCL2      | 10 |
| Hematological System Development and Function,Lymphoid Tissue Structure and Development,Tissue Morphology                                                                         | Quantity of T lymphocytes              | 7.37E-07 |           | -0.684 | Ccl2,CD69,CD74,CCL2  | 19 |
| Cellular Development,Cellular Growth and Proliferation,Hematological System Development and Function,Hematopoiesis,Lymphoid Tissue Structure and Development,Tissue Development   | Leukopoiesis                           | 7.60E-07 |           | 0.223  | ALOX5,C3,CCL2,CCL2   | 24 |
| Cellular Development,Cellular Growth and Proliferation,Connective Tissue Development and Function,Skeletal and Muscular System Development and Function,Tissue Development        | Formation of osteoclasts               | 7.60E-07 |           | -0.83  | ALOX5,ANXA2,CCL2     | 9  |
| Cell Death and Survival,Organismal Injury and Abnormalities                                                                                                                       | Necrosis of epithelial tissue          | 7.64E-07 |           | -1.032 | CD36,CD74,CLU,CCL2   | 20 |
| Cellular Function and Maintenance                                                                                                                                                 | Internalization of cells               | 8.13E-07 |           | -0.647 | BIN1,C3,CD36,CFH     | 12 |
| Interaction                                                                                                                                                                       | Interaction of endothelial cells       | 8.32E-07 |           | 0.557  | ANXA2,C3,CCL2,CCL2   | 11 |
| Hematological System Development and Function,Hypersensitivity Response,Immune Cell Trafficking,Inflammatory Response,Tissue Development                                          | Accumulation of mast cells             | 8.32E-07 |           |        | C3,CCL2,FGFR1,LT     | 4  |
| Cardiovascular System Development and Function                                                                                                                                    | Vascularization                        | 8.42E-07 |           | -0.432 | ANXA2,C3,Ccl2,FCG    | 12 |
| Organismal Survival                                                                                                                                                               | Morbidity or mortality                 | 8.66E-07 |           | 1.338  | ACTA2,ACTB,ALOX5     | 49 |
| Cell Death and Survival,Cellular Function and Maintenance                                                                                                                         | Clearance of cells                     | 8.99E-07 |           | -0.587 | ANXA2,CCL2,Ccl2      | 8  |
| Cell-To-Cell Signaling and Interaction,Hematological System Development and Function,Immune Cell Trafficking,Inflammatory Response                                                | Activation of phagocytes               | 9.13E-07 |           | -1.131 | ANXA2,C3,C4A/C4      | 15 |
| Cardiovascular Disease,Organismal Injury and Abnormalities                                                                                                                        | Atherogenesis                          | 9.39E-07 |           |        | ALOX5,CCL2,Ccl2,CCL2 | 7  |
| Development                                                                                                                                                                       | Chemotaxis of lymphatic system cells   | 9.44E-07 |           | -1.159 | CCL2,Ccl2,CCL24,CCL2 | 9  |
| Cancer,Cell Death and Survival,Organismal Injury and Abnormalities                                                                                                                | Cell death of tumor                    | 1.09E-06 |           | -0.324 | ANXA2,CD74,CLU,CCL2  | 17 |
| Cardiovascular System Development and Function                                                                                                                                    | Neovascularization                     | 1.11E-06 |           | -0.126 | ANXA2,C3,Ccl2,FCG    | 10 |
| Cellular Movement,Hematological System Development and Function,Immune Cell Trafficking,Inflammatory Response                                                                     | Cell movement of macrophages           | 1.16E-06 |           | 0.009  | C3,CCL2,Ccl2,CCL3    | 13 |
| Cell-To-Cell Signaling and Interaction,Cellular Movement,Hematological System Development and Function,Immune Cell Trafficking                                                    | Recruitment of inflammatory leukocytes | 1.16E-06 |           | 0.447  | C3,C4A/C4B,Ccl2,CCL2 | 5  |
| Cardiovascular Disease,Organismal Injury and Abnormalities                                                                                                                        | Atherosclerotic lesion                 | 1.21E-06 |           |        | ALOX5,CCL2,Ccl2,CCL2 | 10 |
| Cancer,Organismal Injury and Abnormalities                                                                                                                                        | Advanced extracranial solid tumor      | 1.24E-06 |           | 1.091  | ACTA2,ALOX5,ANXA2    | 20 |
| Cellular Function and Maintenance                                                                                                                                                 | Uptake of cells                        | 1.25E-06 |           | -0.2   | C3,CD163,CD36,CCL2   | 6  |

|                                                                                                                                                                           |                                             |          |           |        |                   |    |
|---------------------------------------------------------------------------------------------------------------------------------------------------------------------------|---------------------------------------------|----------|-----------|--------|-------------------|----|
| Cell-To-Cell Signaling and Interaction,Hematological System Development and Function,Immune Cell Trafficking                                                              | Binding of granulocytes                     | 1.29E-06 |           | -0.376 | C3,CFH,CFP,FCGR   | 9  |
| Hematological Disease,Immunological Disease                                                                                                                               | Abnormal function of neutrophils            | 1.31E-06 |           |        | ALOX5,Ccl2,CLEC6  | 7  |
| Organismal Injury and Abnormalities,Renal and Urological Disease                                                                                                          | Proteinuria                                 | 1.38E-06 |           | 0.398  | C3,CCL2,Ccl2,CFH, | 10 |
| Hematological System Development and Function,Tissue Morphology                                                                                                           | Quantity of antigen presenting cells        | 1.38E-06 |           | 0.272  | C4A/C4B,CCL2,Ccl  | 13 |
| Neurological Disease,Skeletal and Muscular Disorders                                                                                                                      | Neuromuscular disease                       | 1.47E-06 |           |        | ACTB,ALOX5,ANX    | 25 |
| Cellular Movement                                                                                                                                                         | Transmigration of cells                     | 1.50E-06 |           | 0.974  | ACTA2,CCL2,Ccl2,  | 10 |
| Cell Morphology                                                                                                                                                           | Morphology of leukocytes                    | 1.50E-06 |           |        | C3,CCL2,Ccl2,Ccl7 | 14 |
| Hematological Disease,Immunological Disease                                                                                                                               | Eosinophilia                                | 1.56E-06 |           | -0.229 | ACTB,ALOX5,CCL2   | 10 |
| Gastrointestinal Disease,Organismal Injury and Abnormalities                                                                                                              | Benign oral disorder                        | 1.59E-06 |           |        | ACTB,C3,C4A/C4B   | 16 |
| Cancer,Organismal Injury and Abnormalities                                                                                                                                | Metastatic solid tumor                      | 1.64E-06 |           | 1.153  | ACTA2,ALOX5,AN    | 21 |
| Inflammatory Response                                                                                                                                                     | Function of immune system                   | 1.66E-06 |           |        | ALOX5,C3,C4A/C4   | 9  |
| Cardiovascular Disease,Organismal Injury and Abnormalities                                                                                                                | Formation of vascular lesion                | 1.69E-06 |           |        | ALOX5,CCL2,Ccl2,  | 8  |
| Cellular Movement,Hematological System Development and Function,Immune Cell Trafficking,Inflammatory Response                                                             | Chemotaxis of macrophages                   | 1.80E-06 |           | -0.98  | CCL2,Ccl2,CCL3L3, | 8  |
| Cell Death and Survival                                                                                                                                                   | Cell death of blood cells                   | 1.83E-06 |           | 1.468  | C3,CCL2,Ccl2,CCL3 | 21 |
| Humoral Immune Response,Protein Synthesis                                                                                                                                 | Quantity of IgG                             | 1.89E-06 |           | 0.497  | Ccl2,CD36,CD69,C  | 11 |
| Cardiovascular System Development and Function,Cellular Movement                                                                                                          | Cell movement of endothelial cells          | 1.89E-06 |           | -0.04  | ANXA2,CCL2,CCL2   | 15 |
| Cell-To-Cell Signaling and Interaction,Cellular Function and Maintenance,Hematological System Development and Function,Inflammatory                                       | Phagocytosis of neutrophils                 | 1.94E-06 |           | 0.343  | C3,CD36,CFH,CLEC  | 6  |
| Cellular Movement                                                                                                                                                         | Mobilization of cells                       | 1.94E-06 |           | -1.342 | ALOX5,CCL2,Ccl2,  | 7  |
| Cellular Movement,Organismal Injury and Abnormalities,Respiratory Disease                                                                                                 | Cellular infiltration of lung               | 1.94E-06 |           |        | ACTB,CCL3L3,ENG   | 7  |
| Cell-To-Cell Signaling and Interaction                                                                                                                                    | Binding of lymphatic system cells           | 2.00E-06 |           | 0.091  | ANXA2,CCL2,CD69   | 10 |
| Infectious Diseases                                                                                                                                                       | Parasitic Infection                         | 2.00E-06 |           | -0.128 | C3,C4A/C4B,Ccl2,  | 10 |
| Embryonic Development,Hematological System Development and Function,Lymphoid Tissue Structure and Development,Organ Development,Organismal Development,Tissue Development | Formation of lymphoid tissue                | 2.10E-06 |           | 0.727  | C3,C4A/C4B,CD74   | 14 |
| Organismal Injury and Abnormalities                                                                                                                                       | Bleeding                                    | 2.20E-06 |           | -0.027 | ALOX5,ANXA2,C3    | 16 |
| Cardiovascular Disease,Organismal Injury and Abnormalities                                                                                                                | Intermediate disease stage peripheral arter | 2.22E-06 |           |        | ALOX5,CD163,CFH   | 9  |
| Cellular Function and Maintenance                                                                                                                                         | Cellular homeostasis                        | 2.28E-06 |           | 1.696  | ANXA2,C3,C4A/C4   | 36 |
| Cellular Movement,Hematological System Development and Function,Immune Cell Trafficking,Inflammatory Response                                                             | Chemotaxis of mononuclear leukocytes        | 2.55E-06 | Decreased | -2.003 | CCL2,Ccl2,CCL24,C | 10 |
| Cell-To-Cell Signaling and Interaction,Cellular Growth and Proliferation,Hematological System Development and Function                                                    | Stimulation of leukocytes                   | 2.55E-06 |           | -1.001 | C3,CCL2,CCL24,CD  | 10 |
| Cellular Movement,Hematological System Development and Function                                                                                                           | Mobilization of myeloid cells               | 2.66E-06 |           | -1.432 | ALOX5,CCL2,Ccl2,  | 5  |
| Cell Signaling,Molecular Transport,Vitamin and Mineral Metabolism                                                                                                         | Quantity of Ca2+                            | 2.67E-06 |           | -1.25  | ANXA2,C3,CCL2,C   | 15 |
| Immunological Disease                                                                                                                                                     | Abnormal morphology of immune system        | 2.85E-06 |           |        | C3,Ccl2,Ccl7,CD36 | 13 |
| Organismal Injury and Abnormalities                                                                                                                                       | Wound                                       | 2.96E-06 |           | 0.339  | ACTA2,ANXA2,C3,   | 11 |
| Cancer,Organismal Injury and Abnormalities                                                                                                                                | Lymphatic system tumor                      | 3.26E-06 |           |        | ACTB,ALOX5,ANX    | 39 |
| Cardiovascular System Development and Function,Cellular Movement                                                                                                          | Migration of endothelial cells              | 3.35E-06 |           | -0.093 | ANXA2,CCL2,CD36   | 14 |
| Cell Cycle                                                                                                                                                                | Cell cycle progression                      | 3.38E-06 | Decreased | -2.233 | ACTB,CLU,CSTB,D   | 27 |
| Morphology                                                                                                                                                                | Cell death of tumor cells                   | 3.48E-06 |           | -0.324 | ANXA2,CD74,CLU    | 16 |
| Free Radical Scavenging                                                                                                                                                   | Metabolism of reactive oxygen species       | 3.48E-06 |           | -1.553 | ACTB,ALOX5,ANX    | 17 |
| Cell-To-Cell Signaling and Interaction                                                                                                                                    | Binding of tumor cell lines                 | 3.57E-06 | Decreased | -2.403 | ANXA2,CCL2,Ccl2,  | 15 |
| Cancer,Organismal Injury and Abnormalities                                                                                                                                | Advanced malignant solid tumor              | 3.61E-06 |           | 1.153  | ACTA2,ALOX5,AN    | 22 |
| Cellular Movement,Hematological System Development and Function,Immune Cell Trafficking,Inflammatory Response                                                             | Chemotaxis of peritoneal macrophages        | 3.90E-06 |           | -0.566 | CCL2,Ccl2,CCL3L3, | 4  |
| Cell-To-Cell Signaling and Interaction,Hematological System Development and Function,Immune Cell Trafficking,Inflammatory Response                                        | Activation of antigen presenting cells      | 3.91E-06 |           | -1.806 | ANXA2,C3,CCL2,C   | 13 |
| Immunological Disease,Inflammatory Disease                                                                                                                                | Atopic disease                              | 3.93E-06 |           |        | C3,CD74,EEF1A1,   | 12 |
| Connective Tissue Disorders,Dermatological Diseases and Conditions,Inflammatory Disease,Organismal Injury and Abnormalities,Skeletal and Muscular Disorders               | Scleroderma                                 | 3.96E-06 |           |        | ACTA2,C3,C4A/C4   | 8  |
| Connective Tissue Development and Function,Tissue Development                                                                                                             | Growth of connective tissue                 | 4.00E-06 |           | -1.147 | ACTB,ALOX5,ANX    | 20 |
| Neurological Disease                                                                                                                                                      | Demyelination                               | 4.17E-06 |           | 1.528  | ALOX5,C3,CCL2,Cc  | 8  |
| Connective Tissue Disorders,Inflammatory Disease,Inflammatory Response,Organismal Injury and Abnormalities,Skeletal and Muscular Disorders                                | Experimentally-induced arthritis            | 4.19E-06 |           | -0.025 | C3,CCL3L3,CD69,F  | 9  |
| Cardiovascular Disease,Organismal Injury and Abnormalities                                                                                                                | Peripheral vascular disease                 | 4.34E-06 |           |        | ACTA2,ALOX5,CD    | 16 |
| Cancer,Hematological Disease,Immunological Disease,Organismal Injury and Abnormalities                                                                                    | Neoplasia of leukocytes                     | 4.38E-06 |           |        | ALOX5,ANXA2,C3,   | 38 |
| Organismal Injury and Abnormalities,Respiratory Disease                                                                                                                   | Lung injury                                 | 4.51E-06 |           | -0.97  | ANXA2,C3,CCL2,C   | 10 |
| Cell-To-Cell Signaling and Interaction                                                                                                                                    | Response of mononuclear leukocytes          | 4.67E-06 |           | -1.729 | CCL2,Ccl2,CD69,H  | 11 |

|                                                                                                                                                                                       |                                                 |          |           |        |                   |    |
|---------------------------------------------------------------------------------------------------------------------------------------------------------------------------------------|-------------------------------------------------|----------|-----------|--------|-------------------|----|
| Cellular Movement,Hematological System Development and Function,Immune Cell Trafficking,Inflammatory Response                                                                         | Chemotaxis of antigen presenting cells          | 4.76E-06 |           | -1.354 | CCL2,Ccl2,CCL24,C | 9  |
| Cellular Movement,Hematological System Development and Function,Immune Cell Trafficking                                                                                               | Cellular infiltration by mononuclear leukocytes | 4.85E-06 |           | 0.554  | C3,CCL2,Ccl2,CCL3 | 10 |
| Interaction                                                                                                                                                                           | Binding of endothelial cells                    | 4.85E-06 |           | 0.886  | ANXA2,C3,CCL2,C   | 10 |
| Cardiovascular System Development and Function                                                                                                                                        | Morphology of cardiovascular system             | 4.87E-06 |           |        | ACTA2,BIN1,CCL2   | 24 |
| Immunological Disease                                                                                                                                                                 | Delayed hypersensitive reaction                 | 4.88E-06 |           | 0.816  | CCL2,Ccl2,CD74,C  | 8  |
| Cell-To-Cell Signaling and Interaction,Inflammatory Response                                                                                                                          | Immune response of antigen presenting cells     | 5.02E-06 |           | 0.132  | BIN1,C3,CD36,CD   | 10 |
| Cell-To-Cell Signaling and Interaction,Cellular Movement,Hematological System Development and Function,Immune Cell Trafficking                                                        | Recruitment of antigen presenting cells         | 5.14E-06 |           | -1.98  | CCL2,Ccl2,CCL3L3  | 8  |
| Cellular Function and Maintenance                                                                                                                                                     | Uptake of leukocytes                            | 5.39E-06 |           |        | C3,CD36,GAS6      | 3  |
| Immunological Disease                                                                                                                                                                 | Immediate hypersensitivity                      | 5.58E-06 |           |        | ALOX5,C3,CD74,E   | 13 |
| Cell Death and Survival                                                                                                                                                               | Apoptosis of tumor cell lines                   | 5.63E-06 |           | -0.93  | 3830403N18Rik/x   | 30 |
| Cell-To-Cell Signaling and Interaction                                                                                                                                                | Binding of leukemia cell lines                  | 5.68E-06 |           | -1.854 | ANXA2,CCL2,CD36   | 8  |
| Immunological Disease,Inflammatory Disease,Inflammatory Response,Neurological Disease,Organismal Injury and Abnormalities                                                             | Experimental autoimmune encephalomyelitis       | 5.72E-06 |           | 0.405  | C3,Ccl2,CD74,CLE  | 13 |
| Cardiovascular Disease,Hereditary Disorder,Organismal Injury and Abnormalities                                                                                                        | Familial vascular disease                       | 5.82E-06 |           |        | ACTA2,C3,CCL2,C   | 11 |
| Disease,Inflammatory Response,Organismal Injury and Abnormalities,Skeletal and Muscular Disorders                                                                                     | Polyarticular juvenile rheumatoid arthritis     | 5.87E-06 |           |        | CD69,CD74,GADD    | 7  |
| Cancer,Organismal Injury and Abnormalities,Respiratory Disease                                                                                                                        | Pulmonary metastasis                            | 5.88E-06 |           | 1.091  | ALOX5,ANXA2,CC    | 9  |
| Cancer,Organismal Injury and Abnormalities                                                                                                                                            | Visceral metastasis                             | 6.20E-06 |           | 1.153  | ACTA2,ALOX5,AN    | 15 |
| Immunological Disease,Inflammatory Disease,Ophthalmic Disease,Organismal Injury and Abnormalities                                                                                     | Experimental autoimmune uveoretinitis           | 6.29E-06 |           | 0.277  | ALOX5,CLEC6A,IF   | 4  |
| Hematological Disease                                                                                                                                                                 | Abnormal function of hematopoietic system       | 6.29E-06 |           |        | ANXA2,GAS6,IFN    | 4  |
| Cellular Movement                                                                                                                                                                     | Migration of tumor cell lines                   | 6.34E-06 | Decreased | -2.331 | ACTA2,ANXA2,AP    | 23 |
| Cell Death and Survival                                                                                                                                                               | Cell viability                                  | 6.41E-06 |           | 0.411  | ATP5MD,C3,CCL2    | 32 |
| Connective Tissue Disorders,Immunological Disease,Inflammatory Disease,Organismal Injury and Abnormalities,Skeletal and Muscular Disorders                                            | Lupus erythematosus                             | 6.48E-06 |           |        | ALOX5,C3,C4A/C4   | 13 |
| Neurological Disease,Organismal Injury and Abnormalities                                                                                                                              | Progressive encephalopathy                      | 6.64E-06 |           |        | ANXA2,C3,C4A/C4   | 13 |
| Organismal Development                                                                                                                                                                | Growth of vessel                                | 6.65E-06 |           | -1.091 | CCL2,Ccl2,EDNRB   | 9  |
| Cell-To-Cell Signaling and Interaction,Hematological System Development and Function                                                                                                  | Binding of lymphocytes                          | 6.92E-06 |           | 0.486  | CCL2,CD69,CLEC1   | 9  |
| Cellular Movement,Hematological System Development and Function,Immune Cell Trafficking,Inflammatory Response,Lymphoid Tissue Structure and Development                               | Chemotaxis of lymphocytes                       | 6.93E-06 |           | -1.474 | CCL2,Ccl2,CCL24,C | 8  |
| Infectious Diseases                                                                                                                                                                   | Infection by influenza A virus                  | 7.79E-06 |           |        | C3,C4A/C4B,CCL2   | 5  |
| Cardiovascular Disease,Immunological Disease,Inflammatory Disease,Organismal Injury and Abnormalities                                                                                 | Experimental autoimmune myocarditis             | 7.82E-06 |           |        | CCL2,Ccl2,CCL3L3  | 4  |
| Infectious Diseases                                                                                                                                                                   | Infection by Herpesviridae                      | 7.99E-06 |           | -0.218 | C3,C4A/C4B,CCL2   | 7  |
| Organ Morphology,Organismal Injury and Abnormalities,Renal and Urological Disease,Renal and Urological System Development and Function                                                | Abnormal morphology of renal glomerulus         | 8.49E-06 |           |        | C4A/C4B,CFH,CLU   | 7  |
| Cell-To-Cell Signaling and Interaction,Inflammatory Response                                                                                                                          | Immune response of T lymphocytes                | 8.80E-06 |           | -0.776 | Ccl2,CD69,HLA-DQ  | 8  |
| Organismal Survival                                                                                                                                                                   | Organismal death                                | 8.83E-06 |           | 1.347  | ACTA2,ACTB,ALO    | 46 |
| Protein Synthesis                                                                                                                                                                     | Quantity of cytokine                            | 8.86E-06 |           | 1.372  | ALOX5,C3,Ccl2,CD  | 11 |
| Cellular Movement,Hematological System Development and Function                                                                                                                       | Mobilization of blood cells                     | 9.03E-06 |           | -0.97  | ALOX5,CCL2,Ccl2,  | 6  |
| Free Radical Scavenging                                                                                                                                                               | Synthesis of reactive oxygen species            | 9.15E-06 |           | -1.369 | ACTB,ALOX5,ANX    | 16 |
| Cell-mediated Immune Response,Cellular Movement,Hematological System Development and Function,Immune Cell Trafficking,Inflammatory Response,Lymphoid Tissue Structure and Development | Chemotaxis of T lymphocytes                     | 9.54E-06 |           | -1.22  | CCL2,Ccl2,CCL24,C | 7  |
| Infectious Diseases                                                                                                                                                                   | Staphylococcal infection                        | 9.61E-06 |           |        | C3,C4A/C4B,CD36   | 4  |
| Organismal Injury and Abnormalities,Respiratory Disease                                                                                                                               | Infectious lung disease                         | 9.61E-06 |           |        | C3,C4A/C4B,CCL2   | 4  |
| Hematological System Development and Function,Inflammatory Response,Tissue Morphology                                                                                                 | Quantity of macrophages                         | 9.67E-06 |           | -0.953 | C4A/C4B,CCL2,Ccl  | 10 |
| Cell-To-Cell Signaling and Interaction                                                                                                                                                | Binding of muscle cells                         | 9.84E-06 |           |        | ACTA2,PDIA3,PF4   | 5  |
| Cell-To-Cell Signaling and Interaction,Cellular Function and Maintenance,Hematological System Development and Function,Inflammatory                                                   | Phagocytosis by macrophages                     | 1.01E-05 |           | 0.33   | BIN1,C3,CD36,CLE  | 8  |
| Cellular Development,Cellular Growth and Proliferation                                                                                                                                | Cell proliferation of tumor cell lines          | 1.04E-05 |           | -1.52  | ACTB,ANXA2,ATP    | 36 |
| Connective Tissue Development and Function,Tissue Morphology                                                                                                                          | Quantity of connective tissue cells             | 1.05E-05 |           | -1.066 | C3,CCL2,Ccl2,CD9  | 11 |
| Molecular Transport                                                                                                                                                                   | Quantity of metal                               | 1.08E-05 |           | -1.409 | ANXA2,C3,CCL2,C   | 16 |
| Cellular Function and Maintenance                                                                                                                                                     | Function of mononuclear leukocytes              | 1.10E-05 |           |        | CCL2,Ccl2,CD69,C  | 12 |
| Cancer,Hematological Disease,Organismal Injury and Abnormalities                                                                                                                      | Lymphocytic neoplasm                            | 1.11E-05 |           |        | ALOX5,ANXA2,C3    | 37 |



|                                                                                                                                                                                                          |                                           |          |           |        |                   |    |
|----------------------------------------------------------------------------------------------------------------------------------------------------------------------------------------------------------|-------------------------------------------|----------|-----------|--------|-------------------|----|
| Cellular Development,Cellular Growth and Proliferation,Hematological System Development and Function,Hematopoiesis,Lymphoid Tissue Structure and Development,Tissue Development                          | Hematopoiesis of mononuclear leukocytes   | 1.11E-05 |           | 1.013  | C3,CCL2,CD36,CD6  | 20 |
| Hematological Disease,Immunological Disease                                                                                                                                                              | Lymphoproliferative disorder              | 1.18E-05 |           |        | ALOX5,ANXA2,C3    | 37 |
| Cellular Movement,Hematological System Development and Function,Immune Cell Trafficking                                                                                                                  | Cell movement of natural killer cells     | 1.23E-05 |           | -1.71  | CCL2,Ccl2,CCL3L3, | 6  |
| Connective Tissue Development and Function,Tissue Morphology                                                                                                                                             | Quantity of connective tissue             | 1.27E-05 |           | -1.056 | C3,CCL2,Ccl2,CD36 | 18 |
| Cancer,Hematological Disease,Immunological Disease,Organismal Injury and Abnormalities                                                                                                                   | Lymphocytic cancer                        | 1.29E-05 |           |        | ALOX5,ANXA2,C3    | 36 |
| Cell-To-Cell Signaling and Interaction                                                                                                                                                                   | Response of lymphatic system cells        | 1.29E-05 |           | -1.067 | CCL2,Ccl2,CD9,HL  | 10 |
| Inflammatory Disease,Organismal Injury and Abnormalities,Respiratory Disease                                                                                                                             | Fibrosis of lung                          | 1.34E-05 | Decreased | -2.219 | ALOX5,C3,CCL24,C  | 10 |
| Cardiovascular Disease,Hematological Disease,Organismal Injury and Abnormalities                                                                                                                         | Thrombus                                  | 1.34E-05 |           |        | ANXA2,C3,CD36,C   | 10 |
| Cardiovascular Disease,Inflammatory Disease,Organismal Injury and Abnormalities                                                                                                                          | Myocarditis                               | 1.37E-05 |           | -1.067 | CCL2,Ccl2,CCL3L3, | 5  |
| Infectious Diseases,Neurological Disease,Organismal Injury and Abnormalities,Psychological Disorders                                                                                                     | Prion disease                             | 1.41E-05 |           |        | C3,CLU,MFGE8,PT   | 4  |
| Cellular Growth and Proliferation                                                                                                                                                                        | Colony formation                          | 1.42E-05 |           | -0.765 | BIN1,CCL2,CCL24,  | 18 |
| Cancer,Hematological Disease,Organismal Injury and Abnormalities                                                                                                                                         | Lymphoid cancer                           | 1.44E-05 |           |        | ALOX5,ANXA2,C3    | 37 |
| Cellular Growth and Proliferation,Connective Tissue Development and Function,Tissue Development                                                                                                          | Proliferation of connective tissue cells  | 1.44E-05 |           | -1.069 | ACTB,ALOX5,ANX    | 18 |
| Cell-To-Cell Signaling and Interaction,Cellular Assembly and Organization,Cellular Function and Maintenance,Inflammatory Response                                                                        | Phagocytosis of photoreceptor outer segme | 1.50E-05 |           |        | GAS6,MFGE8,PRC    | 3  |
| Cancer,Organismal Injury and Abnormalities                                                                                                                                                               | Growth of tumor                           | 1.51E-05 |           | -1.253 | ALOX5,ANXA2,CC    | 23 |
| Disease                                                                                                                                                                                                  | Albuminuria                               | 1.52E-05 |           |        | CCL2,CFH,EDNRB,   | 6  |
| Cellular Development,Cellular Growth and Proliferation,Respiratory System Development and Function                                                                                                       | Proliferation of lung cell lines          | 1.52E-05 |           | -0.808 | ALOX5,CCL24,CD9   | 6  |
| Cardiovascular Disease,Organismal Injury and Abnormalities                                                                                                                                               | Peripheral arterial disease               | 1.56E-05 |           |        | ALOX5,CD163,CD3   | 10 |
| Cardiovascular Disease,Connective Tissue Disorders,Dermatological Diseases and Conditions,Immunological Disease,Inflammatory Disease,Organismal Injury and Abnormalities,Skeletal and Muscular Disorders | Systemic sclerosis                        | 1.58E-05 |           |        | ACTA2,C3,C4A/C4   | 7  |
| Cell Death and Survival,Organismal Injury and Abnormalities                                                                                                                                              | Apoptosis of vascular endothelial cells   | 1.66E-05 |           | -0.765 | CD36,CYCS,GAS6,   | 7  |
| Neurological Disease                                                                                                                                                                                     | Demyelination of central nervous system   | 1.68E-05 |           | 1.342  | C3,CCL2,CCL3L3,G  | 5  |
| Lipid Metabolism,Small Molecule Biochemistry                                                                                                                                                             | Synthesis of eicosanoid                   | 1.71E-05 |           | -0.971 | ALOX5,Ccl2,CCL3L  | 10 |
| Cell-To-Cell Signaling and Interaction,Cellular Movement,Hematological System Development and Function,Immune Cell Trafficking,Inflammatory Response                                                     | Recruitment of macrophages                | 1.75E-05 | Decreased | -2.366 | CCL2,Ccl2,CD36,C  | 7  |
| Gastrointestinal Disease,Organismal Injury and Abnormalities                                                                                                                                             | Abnormality of large intestine            | 1.80E-05 |           | -0.127 | ALOX5,C3,CCL2,C   | 14 |
| Cellular Function and Maintenance                                                                                                                                                                        | Function of lymphatic system cells        | 1.84E-05 |           |        | Ccl2,CD69,CD74,G  | 12 |
| Cell-To-Cell Signaling and Interaction,Hematological System Development and Function,Immune Cell Trafficking,Inflammatory Response                                                                       | Activation of granulocytes                | 1.85E-05 |           | -0.842 | C3,CCL2,CFH,FCG   | 7  |
| Dermatological Diseases and Conditions,Gastrointestinal Disease,Immunological Disease,Organismal Injury and Abnormalities                                                                                | Stevens-Johnson syndrome                  | 1.99E-05 |           |        | C3,C4A/C4B,CLU,f  | 4  |
| Cell-To-Cell Signaling and Interaction,Cellular Movement,Hematological System Development and Function,Immune Cell Trafficking,Inflammatory Response                                                     | Recruitment of neutrophils                | 2.04E-05 |           | 0      | ALOX5,CCL2,Ccl2,  | 9  |
| Connective Tissue Disorders,Dermatological Diseases and Conditions,Hematological Disease,Immunological Disease,Organismal Injury and Abnormalities                                                       | Acute immune thrombocytopenic purpura     | 2.23E-05 |           |        | C3,C4A/C4B,FCGR   | 3  |
| Connective Tissue Disorders,Dermatological Diseases and Conditions,Hematological Disease,Immunological Disease,Organismal Injury and Abnormalities                                                       | Chronic immune thrombocytopenic purpura   | 2.23E-05 |           |        | C3,C4A/C4B,FCGR   | 3  |
| Organismal Injury and Abnormalities,Respiratory Disease                                                                                                                                                  | Recurrent sinopulmonary infection         | 2.23E-05 |           |        | C3,C4A/C4B,FCGR   | 3  |
| Developmental Disorder,Hematological Disease,Hereditary Disorder,Immunological Disease,Metabolic Disease,Organismal Injury and Abnormalities                                                             | Congenital agammaglobulinemia             | 2.23E-05 |           |        | C3,C4A/C4B,FCGR   | 3  |
| Cancer,Hematological Disease,Immunological Disease,Organismal Injury and Abnormalities                                                                                                                   | Plasma cell dyscrasia                     | 2.25E-05 |           |        | ANXA2,CCL2,Ccl2,  | 15 |
| Cell-mediated Immune Response,Cellular Movement,Hematological System Development and Function,Immune Cell Trafficking                                                                                    | NK cell migration                         | 2.26E-05 |           | -1.342 | CCL2,Ccl2,CCL3L3, | 5  |
| Cellular Movement                                                                                                                                                                                        | Migration of myeloid cells                | 2.26E-05 |           | 0.067  | C3,CCL2,Ccl2,CCL  | 9  |
| Organismal Injury and Abnormalities,Renal and Urological Disease                                                                                                                                         | Glomerulosclerosis                        | 2.29E-05 |           | -0.475 | C3,CCL2,CLU,GAS   | 8  |
| Hematological System Development and Function,Immune Cell Trafficking,Inflammatory Response,Tissue Development                                                                                           | Accumulation of neutrophils               | 2.30E-05 |           | -0.152 | CCL2,Ccl2,FCGR3A  | 6  |
| Function                                                                                                                                                                                                 | Aggregation of blood cells                | 2.31E-05 |           | -1.177 | C3,CD36,CD9,CFH,  | 10 |
| Cellular Movement,Hematological System Development and Function,Immune Cell Trafficking                                                                                                                  | Migration of granulocytes                 | 2.49E-05 |           | 0.026  | C3,CCL2,Ccl2,CCL  | 8  |
| Cell Death and Survival,Organismal Injury and Abnormalities                                                                                                                                              | Apoptosis of endothelial cells            | 2.50E-05 |           | -0.684 | CD36,CD74,CYCS,   | 9  |

|                                                                                                                                          |                                            |          |           |        |                      |    |
|------------------------------------------------------------------------------------------------------------------------------------------|--------------------------------------------|----------|-----------|--------|----------------------|----|
| Cellular Movement                                                                                                                        | Invasion of cells                          | 2.53E-05 |           | -1.709 | ACTA2, ALOX5, AN     | 24 |
| Cellular Function and Maintenance                                                                                                        | Homeostasis of mononuclear leukocytes      | 2.58E-05 | Increased | 2.107  | Ccl2, CD69, CD74, C  | 17 |
| Cell-To-Cell Signaling and Interaction, Hematological System Development and Function, Inflammatory Response                             | Aggregation of blood platelets             | 2.59E-05 |           | -1.667 | C3, CD36, CD9, CFH   | 9  |
| Development                                                                                                                              | Differentiation of connective tissue cells | 2.66E-05 |           | 0.453  | ALOX5, C3, CCL2, Cc  | 18 |
| Cell-To-Cell Signaling and Interaction, Cellular Growth and Proliferation, Hematological System Development and Function                 | Stimulation of mononuclear leukocytes      | 2.69E-05 |           | -0.483 | C3, CCL2, CD69, CD7  | 8  |
| Hematological System Development and Function, Lymphoid Tissue Structure and Development, Tissue Morphology                              | Quantity of helper T lymphocytes           | 2.76E-05 | Decreased | -2.211 | CD69, IFNGR1, LGA    | 7  |
| Gastrointestinal Disease, Inflammatory Response                                                                                          | Inflammation of gastrointestinal tract     | 2.78E-05 |           | -0.236 | ALOX5, C3, CCL2, Cc  | 15 |
| Cancer, Hematological Disease, Immunological Disease, Organismal Injury and Abnormalities                                                | B cell cancer                              | 2.79E-05 |           |        | ALOX5, ANXA2, CC     | 25 |
| Cardiovascular Disease, Organismal Injury and Abnormalities                                                                              | Infarction                                 | 2.84E-05 |           |        | ACTA2, C3, C4A/C4    | 13 |
| Cellular Movement                                                                                                                        | Cell movement of connective tissue cells   | 2.99E-05 |           | -1.383 | ACTB, CCL2, Ccl2, F  | 10 |
| Cell-To-Cell Signaling and Interaction, Hematological System Development and Function, Immune Cell Trafficking                           | Adhesion of granulocytes                   | 3.04E-05 |           | -0.378 | C3, CFH, GAS6, LGA   | 7  |
| Hematological System Development and Function                                                                                            | Hemostasis                                 | 3.06E-05 |           | -1.4   | ANXA2, C3, C4A/C4    | 12 |
| Gastrointestinal Disease, Inflammatory Disease, Inflammatory Response, Organismal Injury and Abnormalities                               | Inflammation of large intestine            | 3.08E-05 |           | -0.236 | ALOX5, C3, CCL2, Cc  | 13 |
| Dermatological Diseases and Conditions, Inflammatory Disease, Inflammatory Response, Organismal Injury and Abnormalities                 | Dermatitis                                 | 3.14E-05 |           | 0.555  | C3, CD74, EEF1A1, f  | 14 |
| Infectious Diseases                                                                                                                      | Sexually transmitted disease               | 3.14E-05 |           |        | ACTA2, ALOX5, C3,    | 8  |
| Cardiovascular Disease, Organismal Injury and Abnormalities, Skeletal and Muscular Disorders                                             | Myocardial infarction                      | 3.16E-05 |           |        | ACTA2, C3, C4A/C4    | 10 |
| Infectious Diseases, Inflammatory Disease, Neurological Disease                                                                          | Postpoliomyelitis syndrome                 | 3.17E-05 |           |        | C3, C4A/C4B, FCGR    | 3  |
| Immunological Disease, Inflammatory Disease, Neurological Disease                                                                        | Guillain-Barré syndrome                    | 3.17E-05 |           |        | C3, C4A/C4B, FCGR    | 3  |
| Hematological System Development and Function, Lymphoid Tissue Structure and Development, Tissue Morphology                              | Quantity of CD8+ T lymphocyte              | 3.27E-05 |           | -1.111 | CD74, CLEC10A, HL    | 8  |
| Cardiovascular System Development and Function                                                                                           | Neovascularization of organ                | 3.34E-05 |           | 0.391  | C3, Ccl2, FGFR1, LG  | 7  |
| Hematological System Development and Function, Organismal Functions                                                                      | Coagulation of blood                       | 3.38E-05 |           | -1.715 | ANXA2, C3, C4A/C4    | 11 |
| Cellular Function and Maintenance                                                                                                        | Ion homeostasis of cells                   | 3.39E-05 |           | 0.835  | ANXA2, C3, C4A/C4    | 17 |
| Cell Death and Survival                                                                                                                  | Cell death of immune cells                 | 3.60E-05 |           | 0.765  | C3, CCL2, Ccl2, CD6  | 18 |
| Organismal Survival                                                                                                                      | Survival of organism                       | 3.66E-05 |           | 0.889  | C3, CCL2, Ccl2, CCL3 | 20 |
| Cellular Movement                                                                                                                        | Cell movement of hepatic stellate cells    | 3.66E-05 |           | -0.9   | CCL2, Ccl2, LGALS1   | 4  |
| Cell-To-Cell Signaling and Interaction, Hematological System Development and Function, Inflammatory Response                             | Binding of professional phagocytic cells   | 3.70E-05 |           | -0.059 | C3, CCL2, CD69, CFH  | 9  |
| Cell-To-Cell Signaling and Interaction, Hematological System Development and Function, Immune Cell Trafficking, Inflammatory Response    | Activation of neutrophils                  | 3.79E-05 |           | -0.598 | C3, CCL2, CFH, FCGR  | 6  |
| Protein Synthesis                                                                                                                        | Quantity of leptin in blood                | 3.83E-05 |           | 1.219  | ALOX5, C3, Ccl2, CD  | 7  |
| Neurological Disease, Organismal Injury and Abnormalities                                                                                | Epileptic seizure                          | 3.94E-05 |           |        | C3, C4A/C4B, CSTB    | 9  |
| Hematological System Development and Function, Lymphoid Tissue Structure and Development, Tissue Morphology                              | Morphology of lymphoid tissue              | 3.94E-05 |           |        | ALOX5, C3, C4A/C4    | 16 |
| Cell-To-Cell Signaling and Interaction, Cellular Growth and Proliferation, Hematological System Development and Function                 | Stimulation of T lymphocytes               | 4.01E-05 |           | -0.218 | C3, CD69, CD74, CY   | 7  |
| Organismal Development                                                                                                                   | Morphology of body cavity                  | 4.06E-05 |           |        | ALOX5, BIN1, C3, C   | 32 |
| Cell Death and Survival                                                                                                                  | Apoptosis of blood cells                   | 4.19E-05 |           | 1.278  | CCL2, Ccl2, CCL3L3,  | 15 |
| Organismal Injury and Abnormalities, Reproductive System Disease                                                                         | Spontaneous abortion                       | 4.19E-05 |           |        | C3, C4A/C4B, FCGR    | 5  |
| Cardiovascular System Development and Function, Cellular Movement                                                                        | Chemotaxis of endothelial cells            | 4.19E-05 |           | -0.585 | CCL2, CCL24, CD36,   | 5  |
| Cell-To-Cell Signaling and Interaction                                                                                                   | Adhesion of myeloid cells                  | 4.24E-05 |           | -0.714 | C3, CCL2, CFH, GAS   | 8  |
| Cell-To-Cell Signaling and Interaction                                                                                                   | Penetration of monocytes                   | 4.24E-05 |           |        | ANXA2, CCL2          | 2  |
| Cell-To-Cell Signaling and Interaction, Hematological System Development and Function                                                    | Response of lymphocytes                    | 4.32E-05 |           | -0.776 | CCL2, Ccl2, HLA-DQ   | 9  |
| Cellular Growth and Proliferation                                                                                                        | Colony formation of cells                  | 4.33E-05 |           | -0.827 | BIN1, CCL2, CCL24,   | 16 |
| Cardiovascular Disease, Cell Death and Survival, Connective Tissue Disorders, Hematological Disease, Organismal Injury and Abnormalities | Fetal erythroblastosis                     | 4.34E-05 |           |        | C3, C4A/C4B, FCGR    | 3  |
| Hematological Disease, Immunological Disease, Metabolic Disease                                                                          | Severe hypogammaglobulinemia               | 4.34E-05 |           |        | C3, C4A/C4B, FCGR    | 3  |
| Connective Tissue Disorders, Hematological Disease, Organismal Injury and Abnormalities                                                  | Neonatal alloimmune thrombocytopenia       | 4.34E-05 |           |        | C3, C4A/C4B, FCGR    | 3  |
| Infectious Diseases, Respiratory Disease                                                                                                 | Whooping cough                             | 4.34E-05 |           |        | C3, C4A/C4B, FCGR    | 3  |
| Ophthalmic Disease, Organismal Injury and Abnormalities                                                                                  | Nonexudative age-related macular degener   | 4.34E-05 |           |        | C3, CCL2, CFH        | 3  |

|                                                                                                                                                                                                                                    |                                            |          |  |        |                   |    |
|------------------------------------------------------------------------------------------------------------------------------------------------------------------------------------------------------------------------------------|--------------------------------------------|----------|--|--------|-------------------|----|
| Connective Tissue Disorders,Immunological Disease,Inflammatory Disease,Inflammatory Response,Organismal Injury and Abnormalities,Skeletal and Muscular Disorders                                                                   | Juvenile rheumatoid arthritis              | 4.46E-05 |  |        | ALOX5,CD300C,CC   | 9  |
| Digestive System Development and Function,Gastrointestinal Disease,Hepatic System Development and Function,Hepatic System Disease,Inflammatory Disease,Inflammatory Response,Organ Development,Organismal Injury and Abnormalities | Inflammation of liver                      | 4.62E-05 |  | 0.61   | ACTA2,C3,C4A/C4   | 12 |
| Cellular Function and Maintenance                                                                                                                                                                                                  | Endocytosis by epithelial cell lines       | 4.80E-05 |  | -0.106 | C3,CD163,GAS6,P   | 4  |
| Inflammatory Disease,Neurological Disease,Skeletal and Muscular Disorders                                                                                                                                                          | Multiple Sclerosis                         | 5.01E-05 |  |        | ALOX5,C3,C4A/C4   | 10 |
| Cellular Function and Maintenance,Hematological System Development and Function                                                                                                                                                    | Function of T lymphocytes                  | 5.14E-05 |  |        | Ccl2,CD69,CD74,G  | 10 |
| Cellular Function and Maintenance,Hematological System Development and Function                                                                                                                                                    | Function of lymphocytes                    | 5.31E-05 |  |        | Ccl2,CD69,CD74,G  | 11 |
| Immunological Disease,Neurological Disease,Skeletal and Muscular Disorders                                                                                                                                                         | Myasthenia gravis                          | 5.35E-05 |  |        | C3,C4A/C4B,CD74   | 6  |
| Cellular Movement,Hematological System Development and Function,Immune Cell Trafficking,Inflammatory Response                                                                                                                      | Migration of monocytes                     | 5.35E-05 |  | -0.912 | ANXA2,CCL2,Ccl2,  | 6  |
| Cellular Growth and Proliferation,Tissue Development                                                                                                                                                                               | Proliferation of epithelial cells          | 5.72E-05 |  | -0.498 | C3,CD9,CLU,DOK2   | 15 |
| Connective Tissue Disorders,Dermatological Diseases and Conditions,Hematological Disease,Organismal Injury and Abnormalities                                                                                                       | Chronic idiopathic thrombocytopenic purpur | 5.76E-05 |  |        | C3,C4A/C4B,FCGR   | 3  |
| Cardiovascular Disease,Developmental Disorder,Organismal Injury and Abnormalities                                                                                                                                                  | Congenital heart block                     | 5.76E-05 |  |        | C3,C4A/C4B,FCGR   | 3  |
| Inflammatory Disease,Neurological Disease,Organismal Injury and Abnormalities                                                                                                                                                      | Transverse myelitis                        | 5.76E-05 |  |        | C3,C4A/C4B,FCGR   | 3  |
| Immunological Disease,Infectious Diseases                                                                                                                                                                                          | Acquired immunodeficiency syndrome         | 5.77E-05 |  |        | ALOX5,C3,C4A/C4   | 5  |
| Hematological System Development and Function,Immune Cell Trafficking,Inflammatory Response,Tissue Development                                                                                                                     | Accumulation of antigen presenting cells   | 5.97E-05 |  | -1.154 | CCL2,Ccl2,FGFR1,  | 6  |
| Cardiovascular System Development and Function,Organismal Development                                                                                                                                                              | Growth of blood vessel                     | 5.97E-05 |  | -0.391 | EDNRB,GAS6,LGA    | 6  |
| Cellular Movement,Hematological System Development and Function,Immune Cell Trafficking,Inflammatory Response                                                                                                                      | Cell movement of monocytes                 | 6.05E-05 |  | -1.572 | ANXA2,CCL2,Ccl2,  | 8  |
| Neurological Disease,Organismal Injury and Abnormalities                                                                                                                                                                           | Demyelination of spinal cord               | 6.18E-05 |  | 1      | C3,CCL2,GAS6,SP   | 4  |
| Cardiovascular System Development and Function,Hematological System Development and Function                                                                                                                                       | Blood pressure                             | 6.23E-05 |  | 0.517  | ACTA2,CD36,EDN    | 11 |
| Connective Tissue Development and Function,Skeletal and Muscular System Development and Function,Tissue Morphology                                                                                                                 | Quantity of osteoclasts                    | 6.47E-05 |  | -0.896 | C3,CCL2,Ccl2,CD9, | 7  |
| Cancer,Organismal Injury and Abnormalities,Respiratory Disease                                                                                                                                                                     | Advanced lung cancer                       | 6.48E-05 |  | 1.091  | ALOX5,ANXA2,CC    | 10 |
| Cellular Development,Cellular Growth and Proliferation,Nervous System Development and Function,Tissue Development                                                                                                                  | Proliferation of neuronal cells            | 6.52E-05 |  | -1.343 | ACTB,Ccl2,CD9,CL  | 16 |
| Organismal Injury and Abnormalities,Renal and Urological Disease                                                                                                                                                                   | Urination disorder                         | 6.66E-05 |  | -0.665 | C3,CCL2,Ccl2,CFH, | 11 |
| Cellular Movement,Hematological System Development and Function,Immune Cell Trafficking                                                                                                                                            | Cellular infiltration by lymphocytes       | 6.70E-05 |  | 1.273  | C3,CCL2,Ccl2,IFNG | 8  |
| Cellular Development,Cellular Growth and Proliferation,Connective Tissue Development and Function,Tissue Development                                                                                                               | Development of connective tissue cells     | 6.81E-05 |  | -0.83  | ALOX5,ANXA2,CC    | 10 |
| Cell-To-Cell Signaling and Interaction,Cellular Movement                                                                                                                                                                           | Chemoattraction of myeloid cells           | 6.97E-05 |  | -1.195 | C3,CCL2,Ccl2,PF4  | 4  |
| Organismal Injury and Abnormalities,Reproductive System Disease                                                                                                                                                                    | Habitual abortion                          | 6.97E-05 |  |        | C3,C4A/C4B,FCGR   | 4  |
| Organismal Injury and Abnormalities                                                                                                                                                                                                | Injury of mice                             | 7.01E-05 |  | -0.64  | C3,CFP,FCGR3A/F   | 6  |
| Cellular Development,Cellular Growth and Proliferation,Connective Tissue Development and Function,Tissue Development                                                                                                               | Cell proliferation of fibroblasts          | 7.11E-05 |  | -0.968 | ACTB,ALOX5,ANX    | 12 |
| Cell Morphology                                                                                                                                                                                                                    | Morphology of mononuclear leukocytes       | 7.15E-05 |  |        | Ccl2,Ccl7,CD36,CD | 9  |
| Cell Morphology,Cellular Development                                                                                                                                                                                               | Branching of cells                         | 7.17E-05 |  | -1.121 | ANXA2,C3,CCL2,C   | 13 |
| Organismal Injury and Abnormalities                                                                                                                                                                                                | Visceromegaly                              | 7.25E-05 |  |        | C3,C4A/C4B,Ccl2,  | 19 |
| Organismal Development                                                                                                                                                                                                             | Abnormal morphology of body cavity         | 7.32E-05 |  |        | ALOX5,BIN1,C3,C   | 29 |
| Organismal Functions,Organismal Injury and Abnormalities,Tissue Morphology                                                                                                                                                         | Healing of wound                           | 7.41E-05 |  |        | C3,Ccl2,FGFR1,HS  | 8  |
| Cancer,Hematological Disease,Organismal Injury and Abnormalities                                                                                                                                                                   | Mature lymphocytic neoplasm                | 7.44E-05 |  |        | ALOX5,ANXA2,C3,   | 30 |
| Cancer,Cellular Development,Cellular Growth and Proliferation,Organismal Injury and Abnormalities,Tumor Morphology                                                                                                                 | Proliferation of tumor cells               | 7.45E-05 |  | -1.619 | ALOX5,ANXA2,EE    | 14 |
| Cell-To-Cell Signaling and Interaction                                                                                                                                                                                             | Penetration of cells                       | 7.46E-05 |  |        | ACTA2,ANXA2,CC    | 3  |
| Immunological Disease,Neurological Disease,Skeletal and Muscular Disorders                                                                                                                                                         | Generalized myasthenia gravis              | 7.46E-05 |  |        | C3,C4A/C4B,FCGR   | 3  |
| Cell Morphology                                                                                                                                                                                                                    | Budding of cellular membrane               | 7.46E-05 |  |        | ANXA2,AP2M1,S1    | 3  |
| Hematological Disease,Infectious Diseases,Neurological Disease,Organismal Injury and Abnormalities                                                                                                                                 | Cerebral malaria                           | 7.46E-05 |  |        | C3,C4A/C4B,CD36   | 3  |
| Organismal Injury and Abnormalities,Renal and Urological Disease                                                                                                                                                                   | Steroid dependent nephrotic syndrome       | 7.46E-05 |  |        | C3,C4A/C4B,FCGR   | 3  |
| Dermatological Diseases and Conditions,Organismal Injury and Abnormalities                                                                                                                                                         | Toxic epidermal necrolysis                 | 7.46E-05 |  |        | C3,C4A/C4B,FCGR   | 3  |

|                                                                                                                                                                                                                                                                                                                |                                            |          |           |        |                   |    |
|----------------------------------------------------------------------------------------------------------------------------------------------------------------------------------------------------------------------------------------------------------------------------------------------------------------|--------------------------------------------|----------|-----------|--------|-------------------|----|
| Dermatological Diseases and Conditions,Organismal Injury and Abnormalities                                                                                                                                                                                                                                     | Chronic psoriasis                          | 7.62E-05 |           |        | CCL2,CNN1,CRIP1   | 7  |
| Connective Tissue Development and Function,Skeletal and Muscular System Development and Function,Tissue Morphology                                                                                                                                                                                             | Quantity of bone cells                     | 7.66E-05 |           | -0.478 | C3,CCL2,Ccl2,CD9, | 8  |
| Infectious Diseases                                                                                                                                                                                                                                                                                            | Quantity of virus                          | 7.76E-05 |           | -0.152 | ANXA2,Ccl2,CCL3I  | 5  |
| Gastrointestinal Disease,Hepatic System Disease,Metabolic Disease,Organismal Injury and Abnormalities                                                                                                                                                                                                          | Hepatic steatosis                          | 7.77E-05 |           | -1.528 | ALOX5,C3,CCL2,Cc  | 11 |
| Cardiovascular Disease                                                                                                                                                                                                                                                                                         | Aneurysm                                   | 7.78E-05 |           |        | ACTA2,IGFBP7,M    | 6  |
| Cancer,Hematological Disease,Immunological Disease,Organismal Injury and Abnormalities                                                                                                                                                                                                                         | B-cell neoplasm                            | 7.78E-05 |           |        | ALOX5,ANXA2,CC    | 28 |
| Infectious Diseases                                                                                                                                                                                                                                                                                            | Infection by cytomegalovirus               | 7.83E-05 |           |        | C3,C4A/C4B,CCL2   | 4  |
| Organ Morphology,Organismal Injury and Abnormalities,Renal and Urological Disease,Renal and Urological System Development and Function                                                                                                                                                                         | Abnormal morphology of kidney              | 7.90E-05 |           |        | C4A/C4B,CD36,CF   | 10 |
| Organ Morphology,Renal and Urological System Development and Function                                                                                                                                                                                                                                          | Morphology of kidney                       | 7.94E-05 |           |        | C4A/C4B,CD36,CF   | 11 |
| Hematological System Development and Function,Immunological Disease,Lymphoid Tissue Structure and Development,Organ Morphology,Organismal Injury and Abnormalities,Tissue Morphology                                                                                                                           | Abnormal morphology of lymphoid organ      | 7.99E-05 |           |        | ALOX5,C3,C4A/C4   | 13 |
| Cell-To-Cell Signaling and Interaction,Cellular Growth and Proliferation                                                                                                                                                                                                                                       | Stimulation of cells                       | 8.12E-05 |           | -0.852 | C3,CCL2,CCL24,CD  | 11 |
| Hematological System Development and Function,Inflammatory Response,Tissue Morphology                                                                                                                                                                                                                          | Quantity of dendritic cells                | 8.25E-05 |           | 1.594  | CCL2,Ccl2,CLEC4D  | 7  |
| Cellular Movement,Hematological Disease,Immunological Disease,Inflammatory Disease,Inflammatory Response,Organismal Injury and Abnormalities,Respiratory Disease                                                                                                                                               | Eosinophilia of lung                       | 8.33E-05 |           |        | ACTB,CCL3L3,ENC   | 5  |
| Hematological System Development and Function,Lymphoid Tissue Structure and Development,Tissue Morphology                                                                                                                                                                                                      | Quantity of CD4+ T-lymphocytes             | 8.45E-05 | Increased | 2.203  | Ccl2,CD69,CD74,H  | 8  |
| Cancer,Organismal Injury and Abnormalities,Reproductive System Disease                                                                                                                                                                                                                                         | Mammary tumor                              | 8.56E-05 |           | 0.692  | ACTA2,ALOX5,BIN   | 42 |
| Cellular Movement,Hematological System Development and Function,Immune Cell Trafficking,Inflammatory Response                                                                                                                                                                                                  | Migration of macrophages                   | 8.61E-05 |           | -0.676 | CCL2,Ccl2,CCL3L3, | 6  |
| Cellular Function and Maintenance,Molecular Transport                                                                                                                                                                                                                                                          | Flux of inorganic cation                   | 8.66E-05 |           | 0.674  | ANXA2,C3,C4A/C4   | 11 |
| Cell Death and Survival                                                                                                                                                                                                                                                                                        | Cell death of tumor cell lines             | 8.72E-05 |           | -0.634 | 3830403N18Rik/X   | 32 |
| Cellular Movement,Hematological System Development and Function,Immune Cell Trafficking                                                                                                                                                                                                                        | Transmigration of leukocytes               | 8.93E-05 |           | 0.511  | CCL2,Ccl2,CCL24,C | 7  |
| Cellular Function and Maintenance                                                                                                                                                                                                                                                                              | Lymphocyte homeostasis                     | 8.97E-05 | Increased | 2.107  | CD69,CD74,CLEC6   | 16 |
| Organismal Injury and Abnormalities,Tissue Morphology                                                                                                                                                                                                                                                          | Size of lesion                             | 9.00E-05 |           |        | C3,Ccl2,CLU,CSTB  | 12 |
| Cell Signaling                                                                                                                                                                                                                                                                                                 | Protein kinase cascade                     | 9.23E-05 |           | 0.14   | CCL2,CD36,CD74,C  | 14 |
| Organismal Injury and Abnormalities                                                                                                                                                                                                                                                                            | Angiogenesis of lesion                     | 9.29E-05 |           | 0.216  | ANXA2,C3,CD36,U   | 7  |
| Hematological System Development and Function,Humoral Immune Response,Lymphoid Tissue Structure and Development,Tissue Morphology                                                                                                                                                                              | Quantity of B lymphocytes                  | 9.35E-05 |           | -0.285 | C3,CD36,CD69,CD   | 12 |
| Connective Tissue Disorders,Inflammatory Disease,Inflammatory Response,Organismal Injury and Abnormalities,Skeletal and Muscular Disorders                                                                                                                                                                     | K/BxN serum transfer arthritis             | 9.44E-05 |           |        | C3,FCGR3A/FCGR    | 3  |
| Embryonic Development,Hematological System Development and Function,Lymphoid Tissue Structure and Development,Organ Development,Organismal Development,Tissue Development                                                                                                                                      | Lymphangiogenesis                          | 9.57E-05 |           | 0.497  | CD9,EDNRB,FGFR    | 5  |
| Cell-To-Cell Signaling and Interaction,Skeletal and Muscular System Development and Function                                                                                                                                                                                                                   | Binding of smooth muscle cells             | 9.78E-05 |           |        | PDIA3,PF4,SPP1,T  | 4  |
| Connective Tissue Disorders,Immunological Disease,Inflammatory Disease,Organismal Injury and Abnormalities,Skeletal and Muscular Disorders                                                                                                                                                                     | Systemic lupus erythematosus               | 9.84E-05 |           |        | ALOX5,C4A/C4B,C   | 11 |
| Carbohydrate Metabolism                                                                                                                                                                                                                                                                                        | Metabolism of polysaccharide               | 1.00E-04 |           | -1.254 | CCL24,CD36,FGFR   | 10 |
| Cell-mediated Immune Response,Cellular Development,Cellular Function and Maintenance,Cellular Growth and Proliferation,Embryonic Development,Hematological System Development and Function,Hematopoiesis,Lymphoid Tissue Structure and Development,Organ Development,Organismal Development,Tissue Development | Differentiation of Th17 cells              | 1.05E-04 |           | 0.186  | CD69,CLEC6A,IFN   | 6  |
| Cellular Movement,Hematological System Development and Function,Immune Cell Trafficking,Inflammatory Response                                                                                                                                                                                                  | Cellular infiltration by macrophages       | 1.06E-04 |           | 0.014  | C3,CCL2,Ccl2,GAS  | 8  |
| Cardiovascular System Development and Function,Tissue Morphology                                                                                                                                                                                                                                               | Morphology of blood vessel                 | 1.07E-04 |           |        | ACTA2,CCL2,CFH,C  | 11 |
| Cardiovascular Disease,Organismal Injury and Abnormalities                                                                                                                                                                                                                                                     | Advanced stage peripheral arterial disease | 1.08E-04 |           |        | ALOX5,CD163,CD3   | 7  |
| Humoral Immune Response,Inflammatory Response                                                                                                                                                                                                                                                                  | Complement activation                      | 1.10E-04 |           |        | C3,C4A/C4B,CD69   | 6  |
| Infectious Diseases                                                                                                                                                                                                                                                                                            | Infection by RNA virus                     | 1.11E-04 |           | -1.331 | ACTA2,ALOX5,AN    | 21 |
| Cancer,Organismal Injury and Abnormalities,Reproductive System Disease                                                                                                                                                                                                                                         | Breast cancer                              | 1.12E-04 |           |        | ACTA2,ALOX5,C3,   | 40 |
| Gastrointestinal Disease,Inflammatory Disease,Inflammatory Response,Organismal Injury and Abnormalities                                                                                                                                                                                                        | Colitis                                    | 1.13E-04 |           | 0.083  | ALOX5,C3,CCL2,Cc  | 12 |

|                                                                                                                                                                                                                                                                                                                |                                                |          |           |        |                  |    |
|----------------------------------------------------------------------------------------------------------------------------------------------------------------------------------------------------------------------------------------------------------------------------------------------------------------|------------------------------------------------|----------|-----------|--------|------------------|----|
| Cancer,Neurological Disease,Organismal Injury and Abnormalities                                                                                                                                                                                                                                                | Glioblastoma                                   | 1.15E-04 |           |        | CCL2,CD300,CLU   | 13 |
| Cardiovascular System Development and Function,Organismal Development                                                                                                                                                                                                                                          | Vascularization of absolute anatomical regi    | 1.17E-04 |           | 0.555  | C3,Ccl2,FGFR1,LG | 7  |
| Inflammatory Disease,Inflammatory Response,Neurological Disease,Organismal Injury and Abnormalities                                                                                                                                                                                                            | Rasmussen encephalitis                         | 1.17E-04 |           |        | C3,C4A/C4B,FCGF  | 3  |
| Hematological Disease,Hereditary Disorder,Immunological Disease,Organismal Injury and Abnormalities                                                                                                                                                                                                            | Hyper-igm immunodeficiency syndrome            | 1.17E-04 |           |        | C3,C4A/C4B,FCGF  | 3  |
| Cellular Function and Maintenance,Cellular Movement,Hematological System Development and Function,Immune Cell Trafficking,Lymphoid Tissue Structure and Development                                                                                                                                            | Compartmentalization of leukocytes             | 1.17E-04 |           |        | Ccl2,CCL3L3,DOK2 | 3  |
| Cell Death and Survival                                                                                                                                                                                                                                                                                        | Cell death of uterus                           | 1.17E-04 |           |        | CCL24,F13A1,SGK  | 3  |
| Inflammatory Disease,Neurological Disease,Ophthalmic Disease,Organismal Injury and Abnormalities                                                                                                                                                                                                               | Devic syndrome                                 | 1.17E-04 |           |        | C3,C4A/C4B,FCGF  | 3  |
| Inflammatory Disease,Neurological Disease                                                                                                                                                                                                                                                                      | Chronic inflammatory demyelinating polyra      | 1.17E-04 |           |        | C3,C4A/C4B,FCGF  | 3  |
| Cell-To-Cell Signaling and Interaction,Cellular Movement,Hematological System Development and Function,Immune Cell Trafficking,Inflammatory Response                                                                                                                                                           | Chemoattraction of monocytes                   | 1.17E-04 |           |        | CCL2,Ccl2,PF4    | 3  |
| Cardiovascular System Development and Function,Cellular Movement                                                                                                                                                                                                                                               | Migration of vascular endothelial cells        | 1.20E-04 |           | 0.123  | ANXA2,CD36,CD9   | 8  |
| Gastrointestinal Disease,Hepatic System Disease,Organismal Injury and Abnormalities                                                                                                                                                                                                                            | Fibrosis of liver                              | 1.21E-04 | Decreased | -2.425 | CD74,FGFR1,HSP   | 7  |
| Cellular Function and Maintenance                                                                                                                                                                                                                                                                              | Uptake of bacteria                             | 1.21E-04 |           | 0      | C3,CD163,CFH,SN  | 4  |
| Lipid Metabolism,Small Molecule Biochemistry                                                                                                                                                                                                                                                                   | Exposure of phospholipid                       | 1.21E-04 |           |        | CD9,EDNRB,LGAL   | 4  |
| Organismal Injury and Abnormalities                                                                                                                                                                                                                                                                            | Granulation tissue                             | 1.21E-04 |           |        | ACTA2,F13A1,RAI  | 4  |
| Cellular Movement,Hematological System Development and Function,Immune Cell Trafficking,Inflammatory Response                                                                                                                                                                                                  | Homing of M1 macrophages                       | 1.27E-04 |           |        | CCL2,Ccl2        | 2  |
| Lipid Metabolism,Small Molecule Biochemistry                                                                                                                                                                                                                                                                   | Synthesis of leukotriene A4                    | 1.27E-04 |           |        | ALOX5,LTC4S      | 2  |
| Cellular Movement                                                                                                                                                                                                                                                                                              | Transendothelial migration of myeloma cel      | 1.27E-04 |           |        | CCL2,SPP1        | 2  |
| Organismal Injury and Abnormalities,Renal and Urological Disease                                                                                                                                                                                                                                               | Obstructive nephropathy                        | 1.27E-04 |           |        | CCL2,CLU         | 2  |
| Cardiovascular Disease                                                                                                                                                                                                                                                                                         | Calcification of blood vessel wall             | 1.27E-04 |           |        | GAS6,MGP         | 2  |
| Cellular Movement                                                                                                                                                                                                                                                                                              | Migration of connective tissue cells           | 1.31E-04 |           | -0.886 | ACTB,CCL2,FGFR1  | 8  |
| Cellular Movement,Hematological System Development and Function,Immune Cell Trafficking                                                                                                                                                                                                                        | Trafficking of mononuclear leukocytes          | 1.33E-04 |           |        | CCL2,Ccl2,CCL3L3 | 4  |
| Connective Tissue Disorders,Developmental Disorder,Hereditary Disorder,Organismal Injury and Abnormalities,Skeletal and Muscular Disorders                                                                                                                                                                     | Marfan syndrome                                | 1.33E-04 |           |        | ACTA2,CNN1,TAG   | 4  |
| Connective Tissue Disorders,Hematological Disease,Organismal Injury and Abnormalities                                                                                                                                                                                                                          | Early-onset thrombocytopenia                   | 1.33E-04 |           |        | C3,C4A/C4B,CYCS  | 4  |
| Cell-mediated Immune Response,Cellular Development,Cellular Function and Maintenance,Cellular Growth and Proliferation,Embryonic Development,Hematological System Development and Function,Hematopoiesis,Lymphoid Tissue Structure and Development,Organ Development,Organismal Development,Tissue Development | T cell development                             | 1.36E-04 | Increased | 2.107  | CD69,CD74,CLEC6  | 15 |
| Cardiovascular System Development and Function,Cellular Development,Cellular Function and Maintenance,Cellular Growth and Proliferation,Organismal Development,Tissue Development                                                                                                                              | Cell proliferation of vascular endothelial cel | 1.39E-04 |           | 0.354  | C3,CCL2,FGFR1,G  | 8  |
| Lipid Metabolism,Small Molecule Biochemistry                                                                                                                                                                                                                                                                   | Synthesis of fatty acid                        | 1.42E-04 |           | -1.227 | ALOX5,Ccl2,CCL3L | 11 |
| Organismal Injury and Abnormalities                                                                                                                                                                                                                                                                            | Formation of scar tissue                       | 1.44E-04 |           |        | Ccl2,CSTB,SPP1   | 3  |
| Cell-To-Cell Signaling and Interaction,Hematological System Development and Function,Inflammatory Response                                                                                                                                                                                                     | Immune response of helper T lymphocytes        | 1.44E-04 |           |        | Ccl2,LGALS1,SOC  | 3  |
| Gastrointestinal Disease,Hepatic System Disease,Organismal Injury and Abnormalities                                                                                                                                                                                                                            | Damage of liver                                | 1.45E-04 |           | -0.649 | ACTA2,C3,CCL2,Cc | 10 |
| Cell Signaling,Small Molecule Biochemistry                                                                                                                                                                                                                                                                     | Synthesis of nitric oxide                      | 1.45E-04 |           | -0.598 | ALOX5,CD36,CLU   | 10 |
| Cellular Development,Cellular Growth and Proliferation,Digestive System Development and Function,Hepatic System Development and Function,Organ Development                                                                                                                                                     | Proliferation of liver cells                   | 1.48E-04 |           | -0.08  | C3,EDNRB,IFNGR   | 8  |
| Cell Signaling                                                                                                                                                                                                                                                                                                 | MAPKKK cascade                                 | 1.52E-04 |           | 0      | CCL2,CD36,CD74,t | 10 |
| Cell-To-Cell Signaling and Interaction,Hematological System Development and Function,Immune Cell Trafficking,Inflammatory Response                                                                                                                                                                             | Binding of neutrophils                         | 1.59E-04 |           | 0.461  | C3,CFH,FCGR3A/f  | 6  |
| Cellular Movement,Hematological Disease,Immunological Disease,Inflammatory Disease,Inflammatory Response,Organismal Injury and Abnormalities,Respiratory Disease                                                                                                                                               | Allergic pulmonary eosinophilia                | 1.62E-04 |           |        | ACTB,ENO1,PDIA3  | 4  |
| Cell-To-Cell Signaling and Interaction,Cellular Movement,Hematological System Development and Function,Immune Cell Trafficking,Inflammatory Response                                                                                                                                                           | Chemoattraction of phagocytes                  | 1.62E-04 |           | -1.188 | C3,CCL2,Ccl2,PF4 | 4  |
| Cellular Movement,Connective Tissue Development and Function                                                                                                                                                                                                                                                   | Migration of fibroblasts                       | 1.62E-04 |           | -0.57  | ACTB,CCL2,FGFR1  | 7  |

|                                                                                                                                                                                                                                                        |                                                |          |           |        |                    |    |
|--------------------------------------------------------------------------------------------------------------------------------------------------------------------------------------------------------------------------------------------------------|------------------------------------------------|----------|-----------|--------|--------------------|----|
| Cancer,Cell Death and Survival,Organismal Injury and Abnormalities,Tumor Morphology                                                                                                                                                                    | Apoptosis of tumor cells                       | 1.66E-04 |           | -0.286 | ANXA2,CLU,CYCS,    | 10 |
| Organismal Injury and Abnormalities,Renal and Urological Disease                                                                                                                                                                                       | Damage of kidney                               | 1.66E-04 |           | -0.6   | ALOX5,C3,C4A/C4    | 8  |
| Cardiovascular System Development and Function,Organismal Development,Visual System Development and Function                                                                                                                                           | Neovascularization of eye                      | 1.67E-04 |           | 0.164  | C3,Ccl2,FGFR1,LG   | 6  |
| Embryonic Development,Hematological System Development and Function,Lymphoid Tissue Structure and Development,Organ Development,Organismal Development,Tissue Development                                                                              | Formation of lymph node                        | 1.67E-04 |           |        | C3,C4A/C4B,HLA-    | 6  |
| Cardiovascular System Development and Function,Cell-To-Cell Signaling and Interaction                                                                                                                                                                  | Adhesion of endothelial cells                  | 1.73E-04 |           | 0.628  | CCL2,CD36,GAS6,    | 7  |
| Hematological Disease,Hereditary Disorder,Immunological Disease,Metabolic Disease,Organismal Injury and Abnormalities                                                                                                                                  | X-linked agammaglobulinemia                    | 1.74E-04 |           |        | C3,C4A/C4B,FCGF    | 3  |
| Inflammatory Disease,Inflammatory Response,Organismal Injury and Abnormalities,Renal and Urological Disease                                                                                                                                            | Crescentic glomerulonephritis                  | 1.74E-04 |           |        | Ccl2,CCL3L3,SPP1   | 3  |
| Infectious Diseases                                                                                                                                                                                                                                    | Streptococcal infection                        | 1.77E-04 |           |        | C3,C4A/C4B,CCL2,   | 4  |
| Carbohydrate Metabolism,Drug Metabolism,Small Molecule Biochemistry                                                                                                                                                                                    | Synthesis of hyaluronic acid                   | 1.77E-04 |           | -0.152 | CCL24,FGFR1,SPP    | 4  |
| Infectious Diseases                                                                                                                                                                                                                                    | Dengue fever                                   | 1.77E-04 |           |        | C3,CD69,PF4,PRO    | 4  |
| Organismal Injury and Abnormalities,Renal and Urological Disease                                                                                                                                                                                       | Injury of kidney                               | 1.79E-04 |           | -0.2   | ALOX5,C3,Ccl2,CF   | 7  |
| Cellular Movement,Connective Tissue Development and Function                                                                                                                                                                                           | Cell movement of fibroblasts                   | 1.81E-04 |           | -0.911 | ACTB,CCL2,FGFR1    | 8  |
| Cellular Movement,Hematological System Development and Function,Hypersensitivity Response,Immune Cell Trafficking                                                                                                                                      | Cell movement of eosinophils                   | 1.82E-04 |           | -0.861 | C3,CCL2,Ccl2,CCL2  | 6  |
| Hematological System Development and Function,Lymphoid Tissue Structure and Development,Organ Morphology,Tissue Morphology                                                                                                                             | Morphology of lymphoid organ                   | 1.83E-04 |           |        | ALOX5,C3,C4A/C4    | 14 |
| Cardiovascular System Development and Function                                                                                                                                                                                                         | Morphology of vasculature                      | 1.87E-04 |           |        | ACTA2,CCL2,CFH,    | 12 |
| Cellular Development,Cellular Growth and Proliferation,Embryonic Development,Hematological System Development and Function,Hematopoiesis,Lymphoid Tissue Structure and Development,Organ Development,Organismal Development,Tissue Development         | Lymphopoiesis                                  | 1.89E-04 |           | 1.8    | C3,CD36,CD69,CD    | 17 |
| Protein Synthesis                                                                                                                                                                                                                                      | Metabolism of protein                          | 1.93E-04 |           | 0.24   | ALOX5,C3,C4A/C4    | 24 |
| Digestive System Development and Function,Gastrointestinal Disease,Hepatic System Development and Function,Hepatic System Disease,Infectious Diseases,Inflammatory Disease,Inflammatory Response,Organ Development,Organismal Injury and Abnormalities | Infection by hepatitis B virus                 | 2.03E-04 |           |        | C3,C4A/C4B,CCL2,   | 5  |
| Cellular Development,Cellular Growth and Proliferation                                                                                                                                                                                                 | Cell proliferation of breast cancer cell lines | 2.03E-04 |           | -0.08  | ACTB,ANXA2,BIN1    | 14 |
| Cell Death and Survival                                                                                                                                                                                                                                | Cell death of mononuclear leukocytes           | 2.04E-04 |           | -0.017 | Ccl2,CD9,CLEC10A   | 12 |
| Post-Translational Modification                                                                                                                                                                                                                        | Phosphorylation of protein                     | 2.06E-04 |           | 0.705  | ANXA2,C3,CCL2,C    | 17 |
| Cell Death and Survival                                                                                                                                                                                                                                | Apoptosis of leukocytes                        | 2.15E-04 |           | 0.755  | CCL2,Ccl2,CD69,Ct  | 13 |
| Cell Morphology,Inflammatory Response                                                                                                                                                                                                                  | Morphology of phagocytes                       | 2.20E-04 |           |        | C3,CCL2,Ccl2,Ccl7, | 7  |
| Inflammatory Disease,Inflammatory Response,Organismal Injury and Abnormalities,Respiratory Disease                                                                                                                                                     | Pneumonia                                      | 2.20E-04 |           |        | C3,CCL2,EDNRB,F    | 8  |
| Cell Death and Survival,Organismal Injury and Abnormalities                                                                                                                                                                                            | Cell death of epithelial cells                 | 2.25E-04 |           | -0.996 | CLU,CYCS,EEF1A1    | 14 |
| Cellular Movement,Hematological System Development and Function                                                                                                                                                                                        | Cell movement of hematopoietic progenitor      | 2.27E-04 |           | 0.447  | CCL2,CCL3L3,CD65   | 5  |
| Cellular Movement,Hematological System Development and Function,Immune Cell Trafficking                                                                                                                                                                | Mobilization of leukocytes                     | 2.31E-04 |           | -1.067 | ALOX5,CCL2,Ccl2,   | 4  |
| Inflammatory Disease,Inflammatory Response,Organismal Injury and Abnormalities,Renal and Urological Disease                                                                                                                                            | Proliferative nephritis                        | 2.31E-04 |           |        | C3,CFH,PDLIM1,S    | 4  |
| Digestive System Development and Function,Gastrointestinal Disease,Hepatic System Development and Function,Hepatic System Disease,Infectious Diseases,Inflammatory Disease,Inflammatory Response,Organ Development,Organismal Injury and Abnormalities | Viral hepatitis                                | 2.34E-04 |           |        | ACTA2,C3,C4A/C4    | 7  |
| Cardiovascular Disease,Organismal Injury and Abnormalities                                                                                                                                                                                             | Arterial aneurysm                              | 2.40E-04 |           |        | ACTA2,IGFBP7,SP    | 5  |
| Cell Death and Survival,Organismal Injury and Abnormalities                                                                                                                                                                                            | Cell death of epithelial cell lines            | 2.42E-04 | Decreased | -2.159 | CYCS,EEF1A1,EMF    | 10 |
| Cellular Function and Maintenance                                                                                                                                                                                                                      | Engulfment of tumor cell lines                 | 2.42E-04 |           | -1.584 | AP2M1,CD36,FGF     | 7  |
| Cancer,Organismal Injury and Abnormalities,Reproductive System Disease                                                                                                                                                                                 | Female genital tract serous carcinoma          | 2.50E-04 |           |        | ANXA2,C4A/C4B,     | 12 |
| Cardiovascular System Development and Function,Organismal Functions,Tissue Development,Tissue Morphology                                                                                                                                               | Healing of endothelial tissue                  | 2.52E-04 |           |        | CCL2,SPP1          | 2  |
| Cell Signaling,Inflammatory Response                                                                                                                                                                                                                   | Complement activation, alternative pathwa      | 2.52E-04 |           |        | C3,CFP             | 2  |
| Cell Morphology,Organ Morphology,Renal and Urological System Development and Function                                                                                                                                                                  | Cellularity of renal glomerulus                | 2.52E-04 |           |        | CFH,CNN1           | 2  |
| Infectious Diseases                                                                                                                                                                                                                                    | Infection by Murine herpesvirus 4              | 2.52E-04 |           |        | C3,IFNGR1          | 2  |
| Cellular Function and Maintenance,Tissue Development                                                                                                                                                                                                   | Function of fibroblasts                        | 2.52E-04 |           |        | ALOX5,TAGLN        | 2  |

| Supplementary Table 4. Enriched canonical pathways in SWNT-SHP1-treated lesional macrophages from Ingenuity Pathway Analysis. |               |        |         |                                                                         |
|-------------------------------------------------------------------------------------------------------------------------------|---------------|--------|---------|-------------------------------------------------------------------------|
| Functional enrichment was assessed using two-sided Fisher's exact test (n = 4 biologically independent animals per group).    |               |        |         |                                                                         |
| Ingenuity Canonical Pathways                                                                                                  | -log(p-value) | Ratio  | z-score | Molecules                                                               |
| Agranulocyte Adhesion and Diapedesis                                                                                          | 7.25          | 0.0573 |         | MYL9,CCL2,ACTA2,Ccl8,CCL3L3,Ccl2,PF4,ACTB,CCL24,Ccl6,Ccl7               |
| Antigen Presentation Pathway                                                                                                  | 6.79          | 0.158  |         | PDIA3,HLA-DMA,HLA-DQA1,CD74,HLA-DQB1,HLA-DRB5                           |
| Th1 and Th2 Activation Pathway                                                                                                | 6.36          | 0.0535 |         | SOCS3,TGFBR1,HLA-DMA,FGFR1,HLA-DQA1,IFNGR1,HLA-DQB1,TSLP,TIMD4,HLA-DRB5 |
| Th2 Pathway                                                                                                                   | 6.14          | 0.0592 | -1      | SOCS3,TGFBR1,HLA-DMA,FGFR1,HLA-DQA1,HLA-DQB1,TSLP,TIMD4,HLA-DRB5        |
| Granulocyte Adhesion and Diapedesis                                                                                           | 5.53          | 0.05   |         | CCL2,Ccl8,CCL3L3,Ccl2,PF4,CCL24,Ccl6,Ccl7,HSPB1                         |
| T Helper Cell Differentiation                                                                                                 | 5.08          | 0.0822 |         | TGFBR1,HLA-DMA,HLA-DQA1,IFNGR1,HLA-DQB1,HLA-DRB5                        |
| Type I Diabetes Mellitus Signaling                                                                                            | 5.07          | 0.0631 |         | SOCS3,HLA-DMA,HLA-DQA1,IFNGR1,CYCS,HLA-DQB1,HLA-DRB5                    |
| EIF2 Signaling                                                                                                                | 4.69          | 0.0393 |         | EIF3F,RPS15,ACTA2,RPS20,FGFR1,ACTB,RPL30,RAP1A,FAU                      |
| Hepatic Fibrosis / Hepatic Stellate Cell Activation                                                                           | 4.5           | 0.043  |         | MYL9,TGFBR1,CCL2,EDNRB,ACTA2,FGFR1,IFNGR1,TIMP2                         |
| Th1 Pathway                                                                                                                   | 4.48          | 0.0511 | 1.134   | SOCS3,HLA-DMA,FGFR1,HLA-DQA1,IFNGR1,HLA-DQB1,HLA-DRB5                   |
| IL-4 Signaling                                                                                                                | 4.4           | 0.0625 |         | HLA-DMA,FGFR1,HLA-DQA1,HLA-DQB1,RAP1A,HLA-DRB5                          |
| Nur77 Signaling in T Lymphocytes                                                                                              | 4.38          | 0.0847 |         | HLA-DMA,HLA-DQA1,CYCS,HLA-DQB1,HLA-DRB5                                 |
| B Cell Development                                                                                                            | 4.06          | 0.111  |         | HLA-DMA,HLA-DQA1,HLA-DQB1,HLA-DRB5                                      |
| T Cell Exhaustion Signaling Pathway                                                                                           | 3.7           | 0.0385 |         | TGFBR1,HLA-DMA,FGFR1,HLA-DQA1,HLA-DQB1,RAP1A,HLA-DRB5                   |
| Neuroinflammation Signaling Pathway                                                                                           | 3.65          | 0.0288 | 1.667   | TGFBR1,CCL2,HLA-DMA,FGFR1,HLA-DQA1,IFNGR1,MFGE8,HLA-DQB1,HLA-DRB5       |
| Graft-versus-Host Disease Signaling                                                                                           | 3.57          | 0.0833 |         | HLA-DMA,HLA-DQA1,HLA-DQB1,HLA-DRB5                                      |
| Role of NFAT in Regulation of the Immune Response                                                                             | 3.55          | 0.0363 | 1.134   | HLA-DMA,FGFR1,HLA-DQA1,HLA-DQB1,RAP1A,HLA-DRB5,FCGR3A/FCGR3B            |
| Autoimmune Thyroid Disease Signaling                                                                                          | 3.53          | 0.0816 |         | HLA-DMA,HLA-DQA1,HLA-DQB1,HLA-DRB5                                      |
| Regulation of Actin-based Motility by Rho                                                                                     | 3.53          | 0.0562 | -0.447  | MYL9,PFN1,ACTA2,ACTB,MYL12B                                             |
| Dendritic Cell Maturation                                                                                                     | 3.51          | 0.0357 | 1.134   | PDIA3,HLA-DMA,FGFR1,HLA-DQA1,HLA-DQB1,HLA-DRB5,FCGR3A/FCGR3B            |
| Altered T Cell and B Cell Signaling in Rheumatoid Arthritis                                                                   | 3.5           | 0.0556 |         | SPP1,HLA-DMA,HLA-DQA1,HLA-DQB1,HLA-DRB5                                 |
| Epithelial Adherens Junction Signaling                                                                                        | 3.35          | 0.0403 |         | MYL9,TGFBR1,ACTA2,FGFR1,ACTB,RAP1A                                      |
| Glucocorticoid Receptor Signaling                                                                                             | 3.32          | 0.0259 |         | TGFBR1,CCL2,SGK1,FGFR1,ACTB,POLR2K,FKBP5,CD163,RAP1A                    |
| Integrin Signaling                                                                                                            | 3.19          | 0.0317 | -1.134  | MYL9,PFN1,ACTA2,FGFR1,ACTB,RAP1A,MYL12B                                 |
| Regulation of eIF4 and p70S6K Signaling                                                                                       | 3.12          | 0.0364 |         | EIF3F,RPS15,RPS20,FGFR1,RAP1A,FAU                                       |
| Cdc42 Signaling                                                                                                               | 3.09          | 0.0359 |         | MYL9,HLA-DMA,HLA-DQA1,HLA-DQB1,HLA-DRB5,MYL12B                          |
| PKC $\delta$ Signaling in T Lymphocytes                                                                                       | 3.09          | 0.0359 | 0.816   | HLA-DMA,FGFR1,HLA-DQA1,HLA-DQB1,RAP1A,HLA-DRB5                          |
| Actin Cytoskeleton Signaling                                                                                                  | 3.08          | 0.0303 | -1.134  | MYL9,PFN1,ACTA2,FGFR1,ACTB,RAP1A,MYL12B                                 |
| Calcium-induced T Lymphocyte Apoptosis                                                                                        | 3.04          | 0.0606 | 2       | HLA-DMA,HLA-DQA1,HLA-DQB1,HLA-DRB5                                      |
| Virus Entry via Endocytic Pathways                                                                                            | 2.97          | 0.0424 |         | AP2M1,ACTA2,FGFR1,ACTB,RAP1A                                            |
| Cardiac Hypertrophy Signaling                                                                                                 | 2.96          | 0.0289 | -0.378  | MYL9,TGFBR1,PDIA3,FGFR1,RAP1A,MYL12B,HSPB1                              |
| LXR/RXR Activation                                                                                                            | 2.92          | 0.0413 | 0.447   | C4A/C4B,C3,CCL2,CD36,CLU                                                |
| RhoA Signaling                                                                                                                | 2.89          | 0.0407 | -0.447  | MYL9,PFN1,ACTA2,ACTB,MYL12B                                             |
| iCOS-iCOSL Signaling in T Helper Cells                                                                                        | 2.86          | 0.04   | 1.342   | HLA-DMA,FGFR1,HLA-DQA1,HLA-DQB1,HLA-DRB5                                |
| MSP-RON Signaling Pathway                                                                                                     | 2.85          | 0.0541 |         | ACTA2,CCL2,ACTB,FGFR1                                                   |
| Cellular Effects of Sildenafil (Viagra)                                                                                       | 2.77          | 0.0382 |         | MYL9,ACTA2,PDIA3,ACTB,MYL12B                                            |
| Role of JAK1 and JAK3 in $\gamma$ c Cytokine Signaling                                                                        | 2.76          | 0.0513 |         | SOCS3,FGFR1,RAP1A,TSLP                                                  |
| Complement System                                                                                                             | 2.74          | 0.0811 |         | C4A/C4B,C3,CFH                                                          |
| CD28 Signaling in T Helper Cells                                                                                              | 2.72          | 0.0373 |         | HLA-DMA,FGFR1,HLA-DQA1,HLA-DQB1,HLA-DRB5                                |
| NRF2-mediated Oxidative Stress Response                                                                                       | 2.67          | 0.0297 |         | ACTA2,FGFR1,ACTB,FKBP5,RAP1A,SOD3                                       |
| Allograft Rejection Signaling                                                                                                 | 2.61          | 0.0465 |         | HLA-DMA,HLA-DQA1,HLA-DQB1,HLA-DRB5                                      |
| mTOR Signaling                                                                                                                | 2.6           | 0.0288 |         | EIF3F,RPS15,RPS20,FGFR1,RAP1A,FAU                                       |
| Crosstalk between Dendritic Cells and Natural Killer Cells                                                                    | 2.56          | 0.0449 |         | ACTA2,CD69,ACTB,HLA-DRB5                                                |
| OX40 Signaling Pathway                                                                                                        | 2.54          | 0.0444 |         | HLA-DMA,HLA-DQA1,HLA-DQB1,HLA-DRB5                                      |
| Leukotriene Biosynthesis                                                                                                      | 2.5           | 0.154  |         | LTC4S,ALOX5                                                             |
| Death Receptor Signaling                                                                                                      | 2.49          | 0.043  | -1      | ACTA2,ACTB,CYCS,HSPB1                                                   |
| Hereditary Breast Cancer Signaling                                                                                            | 2.49          | 0.0329 |         | GADD45B,FGFR1,ACTB,POLR2K,RAP1A                                         |
| Extrinsic Prothrombin Activation Pathway                                                                                      | 2.32          | 0.125  |         | PROS1,F13A1                                                             |
| Mitochondrial Dysfunction                                                                                                     | 2.27          | 0.0292 |         | NDUFA4,UCP2,COX7A2L,CYCS,NDUFA3                                         |
| FAK Signaling                                                                                                                 | 2.27          | 0.0374 |         | ACTA2,FGFR1,ACTB,RAP1A                                                  |
| PAK Signaling                                                                                                                 | 2.24          | 0.0367 | -1      | MYL9,FGFR1,RAP1A,MYL12B                                                 |
| Oxidative Phosphorylation                                                                                                     | 2.24          | 0.0367 | -1      | NDUFA4,COX7A2L,CYCS,NDUFA3                                              |
| VEGF Signaling                                                                                                                | 2.21          | 0.036  | -1      | ACTA2,FGFR1,ACTB,RAP1A                                                  |
| UVA-Induced MAPK Signaling                                                                                                    | 2.19          | 0.0354 |         | PDIA3,FGFR1,CYCS,RAP1A                                                  |
| IGF-1 Signaling                                                                                                               | 2.19          | 0.0354 |         | SOCS3,FGFR1,IGFBP7,RAP1A                                                |

|                                                             |      |        |        |                                            |
|-------------------------------------------------------------|------|--------|--------|--------------------------------------------|
| Germ Cell-Sertoli Cell Junction Signaling                   | 2.18 | 0.0278 |        | TGFBF1,ACTA2,FGFR1,ACTB,RAP1A              |
| Apelin Cardiomyocyte Signaling Pathway                      | 2.16 | 0.0348 | -1     | MYL9,PDIA3,FGFR1,MYL12B                    |
| Paxillin Signaling                                          | 2.08 | 0.0331 | -1     | ACTA2,FGFR1,ACTB,RAP1A                     |
| Atherosclerosis Signaling                                   | 2    | 0.0312 |        | CCL2,CD36,AOX5,CLU                         |
| Tumoricidal Function of Hepatic Natural Killer Cells        | 1.97 | 0.0833 |        | CYCS,LYVE1                                 |
| IL-8 Signaling                                              | 1.95 | 0.0245 | -1.342 | MYL9,FGFR1,RAP1A,CSTB,MYL12B               |
| STAT3 Pathway                                               | 1.95 | 0.0303 | -1     | SOCS3,TGFBF1,FGFR1,RAP1A                   |
| Adrenomedullin signaling pathway                            | 1.93 | 0.0242 | -2.236 | C3,PDIA3,FGFR1,CFH,RAP1A                   |
| Gap Junction Signaling                                      | 1.92 | 0.024  |        | ACTA2,PDIA3,FGFR1,ACTB,RAP1A               |
| Clathrin-mediated Endocytosis Signaling                     | 1.91 | 0.0239 |        | AP2M1,ACTA2,FGFR1,ACTB,CLU                 |
| IL-6 Signaling                                              | 1.91 | 0.0294 | -1     | SOCS3,FGFR1,RAP1A,HSPB1                    |
| Lipid Antigen Presentation by CD1                           | 1.91 | 0.0769 |        | AP2M1,PDIA3                                |
| Thrombin Signaling                                          | 1.9  | 0.0237 |        | MYL9,PDIA3,FGFR1,RAP1A,MYL12B              |
| Glycine Degradation (Creatine Biosynthesis)                 | 1.89 | 0.5    |        | GATM                                       |
| Leukocyte Extravasation Signaling                           | 1.88 | 0.0235 | -0.447 | ACTA2,FGFR1,ACTB,RAP1A,TIMP2               |
| Agrin Interactions at Neuromuscular Junction                | 1.88 | 0.04   |        | ACTA2,ACTB,RAP1A                           |
| HMGB1 Signaling                                             | 1.86 | 0.0284 | -1     | CCL2,FGFR1,IFNGR1,RAP1A                    |
| Myc Mediated Apoptosis Signaling                            | 1.85 | 0.039  |        | FGFR1,CYCS,RAP1A                           |
| Chemokine Signaling                                         | 1.85 | 0.039  |        | CCL2,CCL24,RAP1A                           |
| Gα12/13 Signaling                                           | 1.84 | 0.028  | -1     | MYL9,FGFR1,RAP1A,MYL12B                    |
| Glioma Invasiveness Signaling                               | 1.84 | 0.0385 |        | FGFR1,RAP1A,TIMP2                          |
| Insulin Receptor Signaling                                  | 1.8  | 0.0272 | -1     | SOCS3,SGK1,FGFR1,RAP1A                     |
| SPINK1 General Cancer Pathway                               | 1.78 | 0.0366 |        | FGFR1,Mt2,RAP1A                            |
| GDNF Family Ligand-Receptor Interactions                    | 1.75 | 0.0357 |        | DOK2,FGFR1,RAP1A                           |
| Angiotensin Signaling                                       | 1.72 | 0.0349 |        | DOK2,FGFR1,RAP1A                           |
| Role of Macrophages, Fibroblasts and Endothelial Cells in R | 1.71 | 0.0186 |        | SOCS3,CCL2,PDIA3,FGFR1,RAP1A,FCGR3A/FCGR3B |
| Erythropoietin Signaling                                    | 1.7  | 0.0341 |        | SOCS3,FGFR1,RAP1A                          |
| Leptin Signaling in Obesity                                 | 1.7  | 0.0341 |        | SOCS3,PDIA3,FGFR1                          |
| Inhibition of Angiogenesis by TSP1                          | 1.68 | 0.0588 |        | TGFBF1,CD36                                |
| Coagulation System                                          | 1.66 | 0.0571 |        | PROS1,F13A1                                |
| Prolactin Signaling                                         | 1.66 | 0.033  |        | SOCS3,FGFR1,RAP1A                          |
| JAK/Stat Signaling                                          | 1.66 | 0.033  |        | SOCS3,FGFR1,RAP1A                          |
| Fcy Receptor-mediated Phagocytosis in Macrophages and M     | 1.65 | 0.0326 |        | ACTA2,ACTB,FCGR3A/FCGR3B                   |
| Interferon Signaling                                        | 1.64 | 0.0556 |        | IFITM3,IFNGR1                              |
| IL-17 Signaling                                             | 1.63 | 0.0323 |        | CCL2,FGFR1,RAP1A                           |
| Tight Junction Signaling                                    | 1.61 | 0.0238 |        | MYL9,TGFBF1,ACTA2,ACTB                     |
| Signaling by Rho Family GTPases                             | 1.6  | 0.0198 | -0.447 | MYL9,ACTA2,FGFR1,ACTB,MYL12B               |
| Glutathione Redox Reactions II                              | 1.59 | 0.25   |        | PDIA3                                      |
| CXCR4 Signaling                                             | 1.58 | 0.0233 | -1     | MYL9,FGFR1,RAP1A,MYL12B                    |
| Aldosterone Signaling in Epithelial Cells                   | 1.56 | 0.023  |        | PDIA3,SGK1,FGFR1,HSPB1                     |
| TR/RXR Activation                                           | 1.55 | 0.03   |        | ENO1,UCP2,FGFR1                            |
| RhoGDI Signaling                                            | 1.55 | 0.0229 | 0      | MYL9,ACTA2,ACTB,MYL12B                     |
| Acute Phase Response Signaling                              | 1.54 | 0.0227 |        | C4A/C4B,SOCS3,C3,RAP1A                     |
| Ceramide Signaling                                          | 1.54 | 0.0297 |        | FGFR1,CYCS,RAP1A                           |
| Mechanisms of Viral Exit from Host Cells                    | 1.53 | 0.0488 |        | ACTA2,ACTB                                 |
| Intrinsic Prothrombin Activation Pathway                    | 1.51 | 0.0476 |        | PROS1,F13A1                                |
| PPARα/RXRα Activation                                       | 1.47 | 0.0215 |        | TGFBF1,PDIA3,CD36,RAP1A                    |
| FAT10 Cancer Signaling Pathway                              | 1.44 | 0.0435 |        | EEF1A1,TGFBF1                              |
| IL-9 Signaling                                              | 1.42 | 0.0426 |        | SOCS3,FGFR1                                |
| Chronic Myeloid Leukemia Signaling                          | 1.42 | 0.0265 |        | TGFBF1,FGFR1,RAP1A                         |
| Production of Nitric Oxide and Reactive Oxygen Species in N | 1.4  | 0.0204 |        | FGFR1,IFNGR1,RAP1A,CLU                     |
| ILK Signaling                                               | 1.39 | 0.0203 | 0      | MYL9,ACTA2,FGFR1,ACTB                      |
| Endothelin-1 Signaling                                      | 1.38 | 0.0201 | -2     | EDNRB,PDIA3,FGFR1,RAP1A                    |
| Sirtuin Signaling Pathway                                   | 1.37 | 0.0171 | 1.342  | NDUFA4,UCP2,GADD45B,NDUFA3,SOD3            |
| Calcium Signaling                                           | 1.33 | 0.0194 |        | MYL9,ACTA2,Tpm2,RAP1A                      |
| PTEN Signaling                                              | 1.33 | 0.0244 |        | TGFBF1,FGFR1,RAP1A                         |
| Protein Kinase A Signaling                                  | 1.32 | 0.015  | 0.447  | MYL9,TGFBF1,DUSP3,PDIA3,RAP1A,MYL12B       |
| Docosahexaenoic Acid (DHA) Signaling                        | 1.31 | 0.037  |        | FGFR1,CYCS                                 |



**Supplementary Table 5. Gene Ontology enrichment analysis of genes that were upregulated in lesional macrophages by exposure to SWNT-SHP1i.**

Functional enrichment was assessed using two-sided Fisher's exact test with Bonferroni correction for multiple comparisons (n = 4 biologically independent animals per group).

| Analyzed List:                                                                                         | upload_1 (Mus musculus)              |       |          |                 |          |
|--------------------------------------------------------------------------------------------------------|--------------------------------------|-------|----------|-----------------|----------|
| Reference List:                                                                                        | Mus musculus (all genes in database) |       |          |                 |          |
| Test Type:                                                                                             | FISHER                               |       |          |                 |          |
| Correction:                                                                                            | BONFERRONI                           |       |          |                 |          |
| ID                                                                                                     | Reference list                       | Input | Expected | Fold Enrichment | P value  |
| MHC class II protein complex (GO:0042613)                                                              | 9                                    | 5     | 0.02     | 100             | 2.29E-07 |
| antigen processing and presentation of exogenous peptide antigen via MHC class II (GO:0019886)         | 14                                   | 5     | 0.04     | 100             | 8.03E-06 |
| antigen processing and presentation of peptide or polysaccharide antigen via MHC class II (GO:0002504) | 16                                   | 5     | 0.04     | 100             | 1.40E-05 |
| antigen processing and presentation of peptide antigen via MHC class II (GO:0002495)                   | 16                                   | 5     | 0.04     | 100             | 1.40E-05 |
| MHC protein complex (GO:0042611)                                                                       | 23                                   | 5     | 0.06     | 86.55           | 1.09E-05 |
| antigen processing and presentation of exogenous peptide antigen (GO:0002478)                          | 24                                   | 5     | 0.06     | 82.95           | 8.05E-05 |
| antigen processing and presentation of exogenous antigen (GO:0019884)                                  | 30                                   | 5     | 0.08     | 66.36           | 2.18E-04 |
| chaperone-mediated protein folding (GO:0061077)                                                        | 50                                   | 5     | 0.13     | 39.81           | 2.24E-03 |
| antigen processing and presentation of peptide antigen (GO:0048002)                                    | 63                                   | 5     | 0.16     | 31.6            | 6.56E-03 |
| antigen processing and presentation (GO:0019882)                                                       | 95                                   | 5     | 0.24     | 20.95           | 4.46E-02 |
| response to bacterium (GO:0009617)                                                                     | 801                                  | 11    | 2.01     | 5.47            | 3.92E-02 |
| response to other organism (GO:0051707)                                                                | 1022                                 | 13    | 2.57     | 5.06            | 1.06E-02 |
| response to external biotic stimulus (GO:0043207)                                                      | 1024                                 | 13    | 2.57     | 5.05            | 1.09E-02 |
| response to biotic stimulus (GO:0009607)                                                               | 1047                                 | 13    | 2.63     | 4.94            | 1.39E-02 |
| multi-organism process (GO:0051704)                                                                    | 2119                                 | 19    | 5.32     | 3.57            | 4.51E-03 |
| protein binding (GO:0005515)                                                                           | 8991                                 | 40    | 22.58    | 1.77            | 9.40E-03 |

**Supplementary Table 6. Gene Ontology enrichment analysis of genes that showed reduced expression in lesional macrophages exposed to SWNT-SHP1i.**

Functional enrichment was assessed using two-sided Fisher's exact test with Bonferroni correction for multiple comparisons (n = 4 biologically independent animals per group).

| Analyzed List:                                                                  | upload_1 (Mus musculus)              |       |          |                 |          |
|---------------------------------------------------------------------------------|--------------------------------------|-------|----------|-----------------|----------|
| Reference List:                                                                 | Mus musculus (all genes in database) |       |          |                 |          |
| Test Type:                                                                      | FISHER                               |       |          |                 |          |
| Correction:                                                                     | BONFERRONI                           |       |          |                 |          |
| ID                                                                              | Reference list                       | Input | Expected | Fold Enrichment | P value  |
| CCR2 chemokine receptor binding (GO:0031727)                                    | 4                                    | 3     | 0.02     | 100             | 6.75E-03 |
| eosinophil chemotaxis (GO:0048245)                                              | 18                                   | 6     | 0.08     | 79.06           | 5.09E-06 |
| eosinophil migration (GO:0072677)                                               | 19                                   | 6     | 0.08     | 74.9            | 6.68E-06 |
| monocyte chemotaxis (GO:0002548)                                                | 33                                   | 6     | 0.14     | 43.13           | 1.17E-04 |
| lymphocyte chemotaxis (GO:0048247)                                              | 39                                   | 7     | 0.16     | 42.57           | 7.41E-06 |
| chemokine activity (GO:0008009)                                                 | 42                                   | 7     | 0.18     | 39.53           | 3.71E-06 |
| mononuclear cell migration (GO:0071674)                                         | 39                                   | 6     | 0.16     | 36.49           | 2.87E-04 |
| CCR chemokine receptor binding (GO:0048020)                                     | 44                                   | 6     | 0.19     | 32.34           | 1.74E-04 |
| lymphocyte migration (GO:0072676)                                               | 55                                   | 7     | 0.23     | 30.19           | 6.44E-05 |
| chemokine-mediated signaling pathway (GO:0070098)                               | 56                                   | 7     | 0.24     | 29.65           | 7.23E-05 |
| chemokine receptor binding (GO:0042379)                                         | 64                                   | 7     | 0.27     | 25.94           | 5.33E-05 |
| cellular response to chemokine (GO:1990869)                                     | 65                                   | 7     | 0.27     | 25.54           | 1.87E-04 |
| response to chemokine (GO:1990868)                                              | 65                                   | 7     | 0.27     | 25.54           | 1.87E-04 |
| neutrophil chemotaxis (GO:0030593)                                              | 76                                   | 7     | 0.32     | 21.85           | 5.07E-04 |
| granulocyte chemotaxis (GO:0071621)                                             | 83                                   | 7     | 0.35     | 20              | 8.90E-04 |
| cellular response to interleukin-1 (GO:0071347)                                 | 72                                   | 6     | 0.3      | 19.77           | 8.10E-03 |
| neutrophil migration (GO:1990266)                                               | 85                                   | 7     | 0.36     | 19.53           | 1.04E-03 |
| granulocyte migration (GO:0097530)                                              | 95                                   | 7     | 0.4      | 17.48           | 2.11E-03 |
| leukocyte chemotaxis (GO:0030595)                                               | 127                                  | 9     | 0.54     | 16.81           | 5.11E-05 |
| response to interleukin-1 (GO:0070555)                                          | 87                                   | 6     | 0.37     | 16.36           | 2.29E-02 |
| myeloid leukocyte migration (GO:0097529)                                        | 117                                  | 8     | 0.49     | 16.22           | 4.84E-04 |
| response to interferon-gamma (GO:0034341)                                       | 125                                  | 8     | 0.53     | 15.18           | 7.85E-04 |
| regulation of phagocytosis (GO:0050764)                                         | 99                                   | 6     | 0.42     | 14.38           | 4.63E-02 |
| cellular response to interferon-gamma (GO:0071346)                              | 100                                  | 6     | 0.42     | 14.23           | 4.90E-02 |
| leukocyte migration (GO:0050900)                                                | 196                                  | 10    | 0.83     | 12.1            | 1.39E-04 |
| regulation of cell shape (GO:0008360)                                           | 146                                  | 7     | 0.62     | 11.37           | 3.26E-02 |
| positive regulation of endocytosis (GO:0045807)                                 | 172                                  | 8     | 0.73     | 11.03           | 7.96E-03 |
| cell chemotaxis (GO:0060326)                                                    | 200                                  | 9     | 0.84     | 10.67           | 2.09E-03 |
| regulation of symbiosis, encompassing mutualism through parasitism (GO:0043903) | 209                                  | 9     | 0.88     | 10.21           | 2.99E-03 |
| positive regulation of ERK1 and ERK2 cascade (GO:0070374)                       | 217                                  | 9     | 0.91     | 9.84            | 4.05E-03 |
| positive regulation of GTPase activity (GO:0043547)                             | 217                                  | 9     | 0.91     | 9.84            | 4.05E-03 |
| myelin sheath (GO:0043209)                                                      | 214                                  | 8     | 0.9      | 8.87            | 6.24E-03 |

|                                                               |      |    |       |      |          |
|---------------------------------------------------------------|------|----|-------|------|----------|
| cytokine activity (GO:0005125)                                | 214  | 8  | 0.9   | 8.87 | 1.20E-02 |
| cytokine-mediated signaling pathway (GO:0019221)              | 255  | 9  | 1.08  | 8.37 | 1.47E-02 |
| regulation of ERK1 and ERK2 cascade (GO:0070372)              | 304  | 10 | 1.28  | 7.8  | 7.03E-03 |
| regulation of endocytosis (GO:0030100)                        | 288  | 9  | 1.21  | 7.41 | 3.86E-02 |
| collagen-containing extracellular matrix (GO:0062023)         | 356  | 11 | 1.5   | 7.33 | 5.73E-04 |
| regulation of GTPase activity (GO:0043087)                    | 295  | 9  | 1.24  | 7.24 | 4.66E-02 |
| positive regulation of hydrolase activity (GO:0051345)        | 502  | 14 | 2.12  | 6.61 | 2.78E-04 |
| cytokine receptor binding (GO:0005126)                        | 323  | 9  | 1.36  | 6.61 | 2.98E-02 |
| receptor ligand activity (GO:0048018)                         | 483  | 12 | 2.04  | 5.89 | 3.00E-03 |
| extracellular matrix (GO:0031012)                             | 473  | 11 | 1.99  | 5.52 | 8.36E-03 |
| receptor regulator activity (GO:0030545)                      | 518  | 12 | 2.18  | 5.49 | 6.11E-03 |
| cellular response to cytokine stimulus (GO:0071345)           | 627  | 13 | 2.64  | 4.92 | 2.34E-02 |
| regulation of hydrolase activity (GO:0051336)                 | 971  | 19 | 4.09  | 4.64 | 2.09E-04 |
| response to cytokine (GO:0034097)                             | 727  | 14 | 3.07  | 4.57 | 2.17E-02 |
| lipid binding (GO:0008289)                                    | 742  | 13 | 3.13  | 4.16 | 4.36E-02 |
| defense response (GO:0006952)                                 | 1299 | 20 | 5.48  | 3.65 | 3.90E-03 |
| immune response (GO:0006955)                                  | 1370 | 21 | 5.78  | 3.64 | 2.03E-03 |
| molecular function regulator (GO:0098772)                     | 1728 | 25 | 7.29  | 3.43 | 1.04E-04 |
| organelle envelope (GO:0031967)                               | 1036 | 15 | 4.37  | 3.43 | 4.35E-02 |
| envelope (GO:0031975)                                         | 1037 | 15 | 4.37  | 3.43 | 4.39E-02 |
| signaling receptor binding (GO:0005102)                       | 1825 | 25 | 7.69  | 3.25 | 2.96E-04 |
| regulation of protein phosphorylation (GO:0001932)            | 1397 | 19 | 5.89  | 3.23 | 4.80E-02 |
| extracellular region part (GO:0044421)                        | 2203 | 29 | 9.29  | 3.12 | 2.50E-05 |
| extracellular space (GO:0005615)                              | 1969 | 25 | 8.3   | 3.01 | 6.40E-04 |
| cellular response to organic substance (GO:0071310)           | 1750 | 22 | 7.38  | 2.98 | 2.68E-02 |
| regulation of catalytic activity (GO:0050790)                 | 1790 | 22 | 7.55  | 2.92 | 3.85E-02 |
| extracellular region (GO:0005576)                             | 2765 | 32 | 11.66 | 2.75 | 7.35E-05 |
| cellular response to chemical stimulus (GO:0070887)           | 2244 | 26 | 9.46  | 2.75 | 1.22E-02 |
| regulation of cellular protein metabolic process (GO:0032268) | 2437 | 27 | 10.27 | 2.63 | 1.68E-02 |
| response to organic substance (GO:0010033)                    | 2415 | 26 | 10.18 | 2.55 | 4.68E-02 |
